# Supplementary material for: Public satisfaction with the healthcare system in China during 2013–2015: a cross-sectional survey of the associated factors
Source: PubMed Central journal article supplement — BMJ Open. 2020 May 27;10(5):e034414. doi: 10.1136/bmjopen-2019-034414 (PMC7259843; doi:10.1136/bmjopen-2019-034414), 2020-05-27
Supplement: bmjopen-2019-034414.draft_revisions.pdf [file bmjopen-2019-034414.draft_revisions.pdf]

# BMJ Open

BMJ Open is committed to open peer review. As part of this commitment we make the peer review history of every article we publish publicly available.

When an article is published we post the peer reviewers' comments and the authors' responses online. We also post the versions of the paper that were used during peer review. These are the versions that the peer review comments apply to.

The versions of the paper that follow are the versions that were submitted during the peer review process. They are not the versions of record or the final published versions. They should not be cited or distributed as the published version of this manuscript.

BMJ Open is an open access journal and the full, final, typeset and author-corrected version of record of the manuscript is available on our site with no access controls, subscription charges or pay-per-view fees (<http://bmjopen.bmj.com>).

If you have any questions on BMJ Open's open peer review process please email [info.bmjopen@bmj.com](mailto:info.bmjopen@bmj.com)

# BMJ Open

## Public satisfaction with health system in China: Rural and geographic variations during 2013 to 2015

|                               |                                                                                                                                                                                                                                                   |
|-------------------------------|---------------------------------------------------------------------------------------------------------------------------------------------------------------------------------------------------------------------------------------------------|
| Journal:                      | <i>BMJ Open</i>                                                                                                                                                                                                                                   |
| Manuscript ID                 | bmjopen-2019-034414                                                                                                                                                                                                                               |
| Article Type:                 | Original research                                                                                                                                                                                                                                 |
| Date Submitted by the Author: | 20-Sep-2019                                                                                                                                                                                                                                       |
| Complete List of Authors:     | Zhang, Jing Hua; Macau University of Science and Technology<br>peng, xinxin; Macau University of Science and Technology<br>Zhang, Hongmin; Macau University of Science and Technology<br>Iwaloye, Ojo; Macau University of Science and Technology |
| Keywords:                     | public satisfaction, health system in China, geographic variations, rural health                                                                                                                                                                  |
|                               |                                                                                                                                                                                                                                                   |

SCHOLARONE™  
Manuscripts

## Title Page

**Article title:** Public satisfaction with health system in China: Rural and geographic variations during 2013 to 2015

**Authors:**

Jing Hua Zhang\*<sup>1</sup>, Xinxin Peng<sup>1</sup>, Hongmin Zhang<sup>1</sup>, Ojo Olukayode Iwaloye<sup>1</sup>

**Affiliation:** 1 School of Business, Macau University of Science and Technology, Macao S.A.R., China

\***Correspondence** to Dr. Jing Hua Zhang, [jhuzhang@must.edu.mo](mailto:jhuzhang@must.edu.mo)

School of Business

Macau University of Science and Technology

Macau S.A.R., China

Tel: (+853) 8897-2986

Fax: +853 2882-7666

**Keywords:** public satisfaction, health system in China, geographic variations, rural health

**Word count:** 4305

## Public satisfaction with health system in China: Rural and geographic variations during 2013 to 2015

### Abstract

**Objective** We aimed to explore how the public satisfaction of the health system in China varies with social and economic factors, especially, rural and geographic variations and changes during 2013 to 2015.

**Design** Population-based, cross-sectional survey performed between July 2013 and July 2015..

**Setting** General population of China during 2013 to 2015

**Participants** Totally 15,969 participants (women=49.4%, sample-weighted average age =51.9)

**Primary outcome measure** Public satisfaction in the health system, defined as “being satisfied ” if a respondent’s satisfaction score  $\geq 70$  points

**Results** 1) The two-year mean of the satisfaction score of the sample is 68.5 out of 100 points and the score in 2015 is higher than 2013 by 3.5 points. 2) Senior respondents (OR=1.19,  $p=0.000$ ), rural respondents (OR=1.23,  $p=0.009$ ) and those with higher socioeconomic status are more likely to report being satisfied. Internal migrants (OR=0.75,  $p=0.000$ ) and those with a higher level of education are less likely to report being satisfied. 3) Total health expenditure percentage of GDP and density of hospital beds have significant positive association (OR=1.13,  $p=0.000$ ). Meanwhile, the government’s share in total health expenditure has a moderate negative association with satisfaction (OR=0.97,  $p=0.000$ ). In rural areas, the density of hospital beds has positive association (OR=1.26,  $p=0.002$ ). 4) The Northeast region and Shanghai (OR =0.49,  $p=0.000$ ; OR=0.71,  $p=0.034$ ) are less likely to report being satisfied, and remained unchanged in 2015.

**Conclusion** There are considerable disparities in the public satisfaction of health system in China, associated with demographic and socioeconomic characteristics, geographic locations, urban-rural environment and regional health resource abundance. Actions are recommended to improve satisfaction with the public health system, especially in Northeast region of China.

### Strengths and limitations of this study

- This study found a moderate negative association with the share of government in the healthcare expenditure, suggesting dissatisfaction derived from the experience with the public health system.
- This study provides empirical evidence about the rural-city disparity and the geographic variations in health satisfaction in China. During the study period, the satisfaction of internal migrants and residents in Northeast region remains unchanged. These findings have important policy implication.
- The survey dataset contains only one global satisfaction score. This data limitation makes it difficult to further attribute the satisfaction or dissatisfaction to specific reform actions or issues of the health system.
- Public satisfaction may be biased by confounding factors, such as media and political discussion, or the citizens' expectations.

# Public satisfaction with health system in China: Rural and geographic variations during 2013 to 2015

## INTRODUCTION

The public satisfaction with health systems is considered one of the most coherent indicators of the general subjective evaluation of healthcare, as well as the acceptability and effectiveness of the healthcare reform[1, 2]. It is a reflection of the shift towards people-centered health system and the emphasis on the responsiveness of the system[3]. The results of public satisfaction surveys may be influenced by wide-ranging factors, such as respondents' views on the general state of affairs in the country[2], debates around the nature and effectiveness of the health system, social welfare culture and media portrayals of the health system[3, 4].

Public satisfaction indicator has several advantages over patient satisfaction measurement. First, it represents a mixture of citizens' personal experiences with the health system and their broader views[2] beyond the provision of quality services; Second, it gathers information on satisfaction from the whole population, including both users and non-users of services. Third, it may affect how the general population utilizes services and their trust in the system[5]. In short, the public satisfaction with health systems has become integral to cross-country and across-time comparisons of health systems[3, 4, 6], as well as health policy evaluations[3, 7].

For decades the priority of the health system in China is set to meet the basic survival needs, such as reducing the mortality[8, 9]. The public satisfaction was not included in the official measurement in China. However, China has achieved a rapid decline in mortality and an unprecedented increase in life expectancy in the past decade. During the recent years, the public satisfaction in China, among many other aspects of the health system, has received wide attention due to the phenomenal intense physician-patient relationships [8-10]. A People-centered Integrated Care has been set as the goal of transition in Healthy China 2030, the new healthcare reform

1  
2  
3  
4 program[8].

5  
6 Currently, there is only a small body of literature studying the public satisfaction  
7 of the health system in China and its related factors[11, 12]. Most are only based on  
8 small survey samples on province level[13, 14]. Some studies focus on the public  
9 dissatisfaction of integration reforms of health insurance schemes[15]. To our  
10 knowledge, no prior studies have systematically examined the nation-wide public  
11 satisfaction of health system upon the second phase of health reform from 2013 to  
12 2015.  
13

14  
15 Specifically, the objectives of this study are: (1) to explore the basic factors  
16 (demographic, socioeconomic and public healthcare resources) associated with the  
17 public satisfaction of the health system in China; (2) to examine how the public  
18 satisfaction of the health system differs between the urban and rural residents, as well  
19 as the major geographic variations in China; (3) to examine changes in the public  
20 satisfaction of the health system between 2013 and 2015.  
21  
22

## 23 24 25 26 27 28 29 30 31 32 33 **HEALTH SYSTEM AND REFORM BACKGROUND IN CHINA**

### 34 35 36 *Institution Background.*

37  
38 The health system in China is largely a public hospital-based delivery system under  
39 the administration of the National Health and Family Planning Commission (NHFPC)  
40 of China[16]. Public hospitals provide more than 90% of the services[9]. A national  
41 accreditation system classifies hospitals into primary, secondary and tertiary levels  
42 according to characteristics such as numbers of beds, professional healthcare force,  
43 diagnosis and treatment equipment, and operation area sizes[16]. The basic health  
44 insurance coverage in China from three major national health insurance systems has  
45 increased significantly during the past decade and has reached 95% of the whole  
46 population in recent years[17].  
47  
48

### 49 50 51 52 53 54 55 *Existing Issues and challenges.*

56  
57 There has been a large volume of literature about the reform of China's health system  
58 in the past decade[8, 18-23]. Due to the privatization and market-oriented reform of  
59  
60

1  
2  
3  
4 the health system in China in the past, by 2000s, there were widespread complaints  
5 about the unaffordable basic health services and difficulties to basic healthcare  
6 access[23, 24]. The disparity in health status had gradually increased across the  
7 country and become a major public policy concern[25]. Meanwhile, due to the fast  
8 growth of the economy and the residents' income, together with the rapid urbanization  
9 in China, there has been an increasingly unmet demand for health service and higher  
10 expectations on the quality and experience with the healthcare system[26].  
11  
12  
13  
14  
15  
16

17 The major existing issues of the system can be summarized as follows: (1) Rising  
18 healthcare cost and high ratio of out-of-pocket expenditure. In 2013, the  
19 reimbursement rates for inpatient care were in the range of 50% to 69%, according to  
20 a resident's health insurance type, which was based on the permanent residence  
21 registration system (rural or urban "Hukou") and/or employment status[17, 27]. (2)  
22 there are large socioeconomic disparity and geographic inequity in healthcare source  
23 allocation and utilization, especially the dichotomy in urban and rural areas[9]. (3)  
24 Financial incentive in the reimbursement and fee-for-service (FFS) payments model  
25 lead to excessive treatment and over prescription[9, 28]. In consequence, there  
26 has arisen a deep distrust of physicians by the public[8, 10, 26]. (4) Poor healthcare  
27 access and service quality perceived by patients. Despite the financial incentive in the  
28 reimbursement of health insurance, no strict referral or gate-keeping system has been  
29 enforced in China yet. Patients are still free to self-refer to hospitals preferred,  
30 regardless of the severity of the sickness[26]. As the results, almost all major hospitals  
31 in China are over demanded and operate over the capacity. While the patients' clinic  
32 waiting time could be as long as a full day, physicians are overloaded and could only  
33 ration a few minutes to meet a patient with technical diagnosis assistance. The  
34 minimal physician-patient face time, on one hand, maybe perceived by patients as  
35 poor service quality, further deteriorate the patient-physician relationship[9]. Together  
36 with the excessive treatment and over-prescription, the deep mistrusts and frustration  
37 of the public often outburst as rising numbers of violent incidents against healthcare  
38 professionals, peaking at the Year 2012[29-31].  
39  
40  
41  
42  
43  
44  
45  
46  
47  
48  
49  
50  
51  
52  
53  
54  
55  
56  
57  
58  
59  
60



### ***2009 Healthcare Reform in China***

In 2009, the Chinese government launched a new wave of healthcare reform actions as part of “the 12<sup>th</sup> Five-Year Plan”, aiming to establish a basic universal health system of safe, effective and affordable service by 2020. To achieve this objective, the government set priorities of achievements in five major areas, including (a) expanding public health insurance, (b) establishment of an Essential Drug System ( with the goals of reducing inappropriate use of drugs, especially over-prescription of antibiotics, and ensuring access to safe, effective, affordable medicines for all.) (c) reforming public hospital, (d) providing primary health care service, and (e) equity of public health services[9].

The healthcare reform was implemented in two sequential phases: (1) The first phase (2009 to 2012) aimed to reallocate resources to healthcare development, to expand the coverage of basic health insurance, and to set up an Essential Drug System. (2) The second phase (2013 to 2015) focused on reforming public hospitals, including the pricing models of health service and prescription drugs[23]. To remove the financial incentives of overprescribing, Zero-Mark-up Drug Policy was implemented among provincial public hospitals (the tertiary-level hospitals) during 2013-2015, after pilot tests in county hospitals in 2012[23].

Due to the implementation approach and pilot tests, geographic variation has become a key characteristic of China’s health system during the reform[32]. Firstly, the reform was implemented by the governments of provinces and cities, which had the discretion to tailor the service level according to the local fiscal budgets available[9]. Secondly, some reform actions first experimented as pilot projects in selected cities or provinces. For examples, public hospitals in Beijing started diagnosis-related groups (DRGs) payment reform since 2011[9, 33]. 100 pilot cities started drug-zero-markup policy from 2012 to 2015. The implementation of the Provincial Reimbursable Drug List (PRDL) also varies largely in quantity and types of medicine.

## METHOD

### *Data analysis and ethical considerations*

Data for this study was collected throughout January to June 2018 by the authors from a range of public data sources. The main data is from the Chinese General Social Survey (CGSS), publicly downloadable at <http://www.cnsda.org/index.php>. No individual patient data was collected for the study and therefore, this study did not require ethics approval.

### *Patient and public involvement*

Patient and public were not involved in the design or planning of this study.

### *Data source*

The major data source of this study is the Chinese General Social Survey (CGSS), a national representative continuous survey project in China since 2003. The CGSS aims to collect dynamic information about Chinese residents' life quality. It first included a single question about public satisfaction of health system in 2013, and then in 2015 a set of detailed questions about public satisfaction regarding various aspects of public healthcare provision. The timing of these two surveys matched well with the agenda of the 2nd phase of 2009 Health Reform, thus has provided good opportunities to study how the public satisfactions have changed after the implementation of the reform. These data are the latest available ones containing public satisfaction of the health system in China. This study adopts the combined datasets from the two waves in 2013 and 2015.

Administered throughout all 31 provinces or municipalities in China, both waves of CGSS surveys adopted the same multi-stage stratified sampling design. The Primary Sampling Unit (PSU) is a county-level unit and there are 2,762 PSUs in the sampling frame. In each wave, the CGSS sampled about 12,000 households and a KISH grid procedure was used to randomly select one adult respondent (18 years of age or older) from each household for a face-to-face in-home interview. Sampling weights were included to reflect the general population parameters of the survey year.

The final sample contains 15,969 observations from the CGSS 2013 and 2015 combined, after deleting observations with important missing variables. There are only 5566 observations from Wave 2013 because CGSS 2013 designed to sample only about half of all respondents to answer the public health satisfaction survey.

1  
2  
3 Additionally, the data of healthcare resources and expenditure on the provincial  
4 level were obtained from the China Public Health Statistical Yearbook 2013 and  
5 2015.  
6  
7  
8  
9  
10  
11  
12

### 13 ***Dependent variable.***

14  
15 Public satisfaction in the health system. The measurement is based on the single  
16 question, ‘Taking all aspects into consideration, how is your general satisfaction in the  
17 healthcare system?’ Respondents were asked to assign a score between 0 to 100, with  
18 ‘0’ representing totally unsatisfied and ‘100’ for totally satisfied. To be consistent  
19 with literature[5, 34]), we constructed a dummy variable of “being satisfied”, which  
20 takes the value of ‘1’ if a respondent’s satisfaction score is greater than or equals to 70  
21 points[34].  
22  
23  
24  
25  
26  
27  
28

### 29 ***Independent variables***

30  
31 Demographic and socioeconomic characteristics. Control variables included gender  
32 (1= female), age group (1= those older or equal to 60 years), minority ethnic group  
33 (1= Yes ), marital status (1= married/living together), and education levels ( a  
34 category variable). General physical health condition was measured by a single item:  
35 ‘How do you evaluate your health condition overall?’ Respondents rated on a  
36 five-point Likert scale (1=very unhealthy, 2 = unhealthy, 3 = so-so, 4 = healthy, and 5  
37 = very healthy). Socioeconomic information included living areas (urban or rural),  
38 internal migrant status (1=Yes), employment status (employed =1), primary health  
39 insurance status (1=Yes) and basic pension status (1=Yes). Household  
40 social-economic status was measured as ‘below the average’, ‘middle class’,  
41 ‘middle-high’, and ‘high’, according to the respondent’s answer to a single item:  
42 ‘How do you assess your relative economic condition in the society?’.  
43  
44  
45  
46  
47  
48  
49

50  
51 Healthcare resources on an aggregated level. We include key indicators of the public  
52 healthcare resources, such as total health expenditure as a percentage of GDP, the  
53 government’s percentage of total expenditure on health, out-of-pocket percentage of  
54 individuals. We also include the densities of the health workforce and hospital beds[3]  
55 (per 10,000 population ) in rural and urban areas of each province respectively.  
56  
57  
58  
59

60 Year and region dummy variables. By economic region classification, there are four

1  
2  
3 regions in China, namely, East, Central, West, and Northeast regions. We also  
4 included dummies to identify four municipalities, namely, Beijing, Shanghai, Tianjin,  
5 and Chongqing, which have abundant health resources and are also the pilot cities of  
6 some health reforms. A dummy variable was included to identify the survey wave of  
7 the year 2015.  
8  
9  
10  
11  
12

### 13 *Statistical analysis*

14  
15 The baseline model is a multivariate logistic regression model[3, 5, 35, 36], analyzing  
16 the major factors associated with Chinese residents' satisfaction of the health system.  
17 The dependent variable was the dummy variable of "being satisfied" with the health  
18 system. The independent variables included all individual and provincial level  
19 variables as introduced in Measures section. In step two, to examine the rural  
20 disparities, we added interaction terms of rural and health resource variables. To  
21 examine how the satisfaction in rural areas change over 2013 and 2015, we tested  
22 with the interaction term of the rural area and year dummy of 2015. In step three,  
23 adopting interaction terms of region dummies and Year2015, we examined the  
24 changes in the geographic variations over time. All regressions were conducted in  
25 STATA 15, weight-adjusted, using the survey weights provided in the original  
26 datasets.  
27  
28  
29  
30  
31  
32  
33  
34  
35  
36  
37

## 38 **RESULTS**

### 39 *Descriptive statistics*

40  
41 Table 1 reports the demographic statistics of the participants (Panel A ) and summary  
42 information of the healthcare resources in various regions in China (Panel B). As  
43 reported in Table 2, the mean satisfaction score of the sample is 68.5 out of 100 points.  
44 The scores in 2013 and 2015 are 66.2 and 69.7 respectively. Panel B of Table 2  
45 reports the percentage of respondents who scored above 70 points and are classified  
46 as "being satisfied with the health system". This ratio was 52.9% in 2013, then 63.9%  
47 in 2015, suggesting that the public satisfaction of the health system in China has made  
48 general improvement during the study period.  
49  
50  
51  
52  
53  
54  
55  
56  
57

### 58 *Baseline analysis*

1  
2  
3 Table 3 reports the logistic regression results of the demographic characteristics of  
4 baseline analysis. Senior respondents (older than or equal to 60 years) are  
5 significantly more likely by 19 percentage points (OR=1.19, p=0.000) to report being  
6 satisfied with the health system.  
7  
8  
9

10 Respondents from rural areas on average are more likely to report being satisfied  
11 (OR=1.23, p=0.009). Those are from ethnic minority groups, with basic health  
12 insurance [37, 38], with better self-reported health, or with higher self-rated  
13 social-economic status, are at greater odds to report being satisfied. Meanwhile,  
14 internal migrants (OR=0.75, p=0.000) and those with a higher level of education[27]  
15 are less likely to report being satisfied.  
16  
17  
18  
19

20 As for the association with province-level health resources and expenditures,  
21 higher total health expenditure percentage of GDP and density of hospital beds are  
22 significantly associated with a higher probability of reporting being satisfied  
23 (OR=1.13, p= 0.000). Meanwhile, the government's share in total health expenditure  
24 has a moderate negative association with satisfaction (OR=0.97, p= 0.000).  
25 Out-of-pocket percentage and the density of the healthcare workforce are  
26 insignificant.  
27  
28  
29  
30  
31

32 Additionally, in the year 2015, the respondents were on average more likely than  
33 in the year 2013 by 51 percentage points to report being satisfied.  
34  
35  
36  
37

### 38 ***Rural disparities and changes***

39 As reported in Panel A of Table 4, in the rural area the density of hospital beds is  
40 positively associated with higher satisfaction (OR=1.26, p= 0.002). The effect is even  
41 stronger than the main effect (OR=1.02, p= 0.057) in Table 3. The density of the  
42 health workforce in rural areas or the dummy variable rural area is not significant in  
43 this specification.  
44  
45  
46  
47

48 Panel B reports the changes in rural areas during the period of 2013 to 2015. The  
49 coefficients of Rural\*2015 indicates that rural residents are more likely by 57  
50 percentage points in 2015 to report being satisfied (OR=1.57, p=0.000). After  
51 including the interaction term of rural areas and year 2015, the odds ratio of the rural  
52 area is reduced to be 1.00 and totally insignificant, while the Year 2015 is still  
53 significant though its odds ratio became smaller.  
54  
55  
56  
57  
58  
59  
60

### 60 ***Geographic variations***

As shown in Table 3, with East China as the baseline region, Middle and West China regions (OR =1.36, p=0.001; OR=1.28, p=0.019), together with Tianjin and Chongqing municipalities (OR =1.48, p=0.001; OR=2.03, p=0.000), are on average more likely to report being satisfied. On another hand, the Northeast region and Shanghai (OR =0.49, p=0.000; OR=0.71, p=0.034) are less likely by about 51 to 30 percentage points respectively. Beijing is not significantly different from the East region.

After the interaction terms of Year2015 and regions are controlled, the results reported in Table 5 indicate that the differences in Middle and West China regions are no longer significant, but the differences in Tianjin, Chongqing, Shanghai and the Northeast region of China are robust and consistent.

### ***Changes in 2015***

Dummy variable Year 2015 captures the average changes in the public satisfaction. As reported in Table 3 and Table 5, the odds ratios of Year 2015 are 1.36 and 1.23 respectively, highly significant in both specifications.

In 2015, after controlling the average year effect and region effects, respondents from the Middle (OR=1.60, p=0.000) and the West China regions (OR=1.44, p=0.002) are significantly more likely to report being satisfied than those from the base group of East China region. Meanwhile, there was no significant improvement in the Northeast region or Shanghai City, though respondents from this two regions tend to report less satisfied.

## **Discussion**

### ***Demographic and socioeconomic characteristics***

The association relationships between the various demographic characteristics and the public satisfaction of health system found in this study are all consistent with existing literature. For example, the senior[27, 39], those with better self-rated health[37], and those with higher social economic status[40], are more likely to report being satisfied[13, 14]. Those are with a lower level of education[27] and those in rural areas[27, 35] more likely to report being satisfied too[14].

This phenomenon may be explained by the role of respondents' expectation[4, 5]. Residents with a lower level of education and in rural areas of China have had a lower

1  
2  
3 level of expectation. For decades in the past, they only had very limited access to  
4 public healthcare resources and social welfare. Also, they usually are unaware of their  
5 entitlements of citizenship or patient rights[41].  
6  
7

### 8 ***Healthcare resources***

9  
10 Generally, more healthcare workforce and resources are associated with a higher level  
11 of public satisfaction of the health system[3, 36]. However, this study has mixed  
12 findings.  
13  
14

- 15 1) There are positive associations between public satisfaction and the healthcare  
16 expenditure's percentage in GDP, as well as the density of hospital beds[36].  
17 These findings are consistent with the general perception in literature[3, 34].  
18
- 19 2) Generally, lower expense out of pocket is preferred by the population. A higher  
20 level of healthcare professionals in the population usually appears to increase  
21 overall patient satisfaction[34, 42]. However, the findings of this study suggest  
22 that the ratio of expenses out of pocket and density of healthcare professionals are  
23 not significant determinants of the public satisfaction in the context of China. This  
24 phenomenon may due to the overcrowded and overcapacity situations in public  
25 hospitals in the central cities or developed regions in China[9].  
26  
27 3) This study has found that there is a moderate negative association with the share  
28 of government in the healthcare expenditure. Despite the government has  
29 provided funds to reduce the economic burdens of healthcare spending, the public  
30 has become less satisfied. This finding is different from those in European  
31 countries[3, 34, 43].  
32

33 This paradox may due to the dissatisfaction derived from the experience with the  
34 public health system, which usually will not pay for or provide preferred  
35 treatments or doctors. For example, upon the implementation of Essential Drug  
36 Lists and Drug Zero-mark-up policy in public hospitals, despite less expenditure  
37 out of pocket, the availability of preferred therapies are limited too[4, 23]. In the  
38 United States, "accessing most preferred care" is highly important to the  
39 satisfaction and the perception is stronger there than in other high-income  
40 countries[6].  
41  
42

### 43 ***Rural disparities***

44 As reported in Panel A of Table 4, the density of hospital beds in rural areas of China  
45  
46  
47  
48  
49  
50  
51  
52  
53  
54  
55  
56  
57  
58  
59  
60

1  
2  
3 has an strong positive association with the satisfaction (OR=1.26, p=0.002), whereas  
4 odds ratio is only 1.04 (p=0.057) in the baseline model. This phenomenon may be  
5 explained as follows. First, hospitalization is often perceived in China as health care  
6 with better quality and with more experienced physicians. Second, because inpatient  
7 service has a higher reimbursement ratio than outpatient service, hospitalization is  
8 often preferred by many patients in China[17, 26]. Third, in rural areas of China,  
9 hospitalization can especially be helpful for a patient with having access to quality  
10 medical care and alleviating the commuting needs from sparsely located home  
11 places[41]. Additionally, if admitted to hospitalization, most rural residents have  
12 lower opportunity cost of time than urban residents, since they don't have  
13 office-commuting requirement.  
14  
15  
16  
17  
18  
19  
20  
21

22 While the bed occupancy rate of tertiary hospitals in China could be as high as 107.5%  
23 on average, it may be as low as 58.0% in township-level hospitals [44]. It is often  
24 difficult to get admitted into tertiary hospitals, or with shorter length of stay[16].  
25  
26  
27

28 When there is a higher density of hospital beds in rural areas, it may be easier for a  
29 patient to get hospitalization admission[45-47]. Therefore, rural residents with easy  
30 hospitalization admission may perceive having good quality healthcare with low cost  
31  
32  
33  
34  
35 Consequently, they may report having high level of satisfaction.

36 As shown in Panel B of Table 4, the odds ratio of Rural\*2015 is as large as 1.57  
37 (p=0.000). This finding indicates a large and significant enhancement in the  
38 satisfaction of the health system in rural areas. After controlling the changes in 2015,  
39 the odds ratio of rural area becomes insignificant, while the year dummy of 2015 is  
40 still large and highly significant (OR=1.24, p=0.000). Together, these results suggest  
41 that the healthcare reform actions of China from 2013 to 2015 have brought  
42 significant improvements to the healthcare satisfaction in rural areas.  
43  
44  
45  
46  
47

#### 48 ***Geographic variations and changes in 2015***

49 The geographic differences in the healthcare system satisfaction may have  
50 reflected the inequality of healthcare resources and quality in China[48]. Beijing,  
51 Shanghai, Tianjin, and Chongqing City, the four municipalities are the most important  
52 central cities in China with the most advanced and abundant healthcare resources of  
53 China. Since they have also piloted many healthcare reform plans, it is not unexpected  
54 that there are no significant changes in the public satisfaction of health system during  
55  
56  
57  
58  
59  
60



1  
2  
3 the studied period.

4  
5 South and West regions, are more likely to experience a significant and large  
6 enhancement of healthcare satisfaction during the reform of 2013-2015, because  
7 many of the reform policies were eventually implemented in these regions after  
8 piloting in East region of China.  
9

10  
11 Shanghai has lower level of satisfaction, it may be due to the very crowded  
12 hospital environment and resources. As the most modernized city in China, Shanghai  
13 has the most skilled professionals and advanced medical equipments. However, all  
14 tertiary hospitals in Shanghai are always highly demanded and crowded with patients  
15 from all over the country without referral system[16]. Hence, local Shanghai residents  
16 actually don't have good experience generally. This situation has not been improved  
17 during this round of healthcare reform.  
18  
19

20  
21 It is noted that the Northeast Region consistently reported a lower level of  
22 satisfaction and no significant improvements during the studied period. The low  
23 satisfaction actually can be attributed to the weak economy concurrently in this region.  
24 Known as China's rustbelt, the three northeastern provinces were plagued by  
25 widespread layoffs in the 1990s and were among the weakest economic growth region  
26 in 2010s[49]. With the shrinking economy and fiscal deficits, the local governments  
27 had a very limited resource available for healthcare and many local healthcare  
28 professionals migrated to other developed regions in the country [9, 50]. Additionally,  
29 poor economic performance may also directly affect the respondents' perception and  
30 lead to a lower rating of the public policies, including the health system[3, 5].  
31 Additionally, Chen et al. (2019) report that patients in the Northeast consistently had  
32 the highest mortalities in terms of the overall stroke and each subtype of stroke[51].  
33 The researchers indicate that this may mainly due to the differences in lifestyle and  
34 inconsistent medical development and economic level.  
35  
36  
37  
38  
39  
40  
41  
42  
43  
44  
45  
46  
47  
48  
49

### 50 ***Robustness check***

51 As a robustness check, we redefined "being satisfied" as those who scored greater  
52 than 80 points and performed the same logistic regressions. We also performed  
53 Ordinary Least Square (OLS) regressions, using the original 'satisfaction score' of  
54 respondents as the dependent variable and examined the rural and regional disparities.  
55 Not reported here, the results of robustness checks are all consistent with our current  
56 findings.  
57  
58  
59  
60

## LIMITATIONS

As a type of subjective evaluation, public satisfaction has several weaknesses when being adopted to measure the health system performance. First, the data in this study, especially, the CGSS 2013, contain only one global satisfaction score. Therefore, it is difficult to attribute the satisfaction or dissatisfaction to specific reform actions or issues of the health system [5]. With the advancement in research and reform of health system in China, dataset with more detailed information may be available in recent years.

Second, while being related with the quality and outcome of healthcare service, public satisfaction may also be influenced by some external factors, such as media and political discussion [5, 36], or the citizens' expectations. Since these confounding factors are not included in the original survey data and it is almost impossible to identify or recover them from other resources, we cannot completely rule out the possibility of potential bias brought by these factors. While it will be interesting to study how media reports and portrays about physicians and hospitals may influence the public's perception or satisfaction about the health system in China, this topic actually is beyond our research scope and expertise.

## CONCLUSION

Using a sample of totally 15,969 observations from Chinese national representative surveys, the CGSS 2013 and 2015, we examined various factors associated with the public satisfaction of the health system in China. We observed considerable disparities in the satisfaction, which are associated with demographic and socioeconomic characteristics, geographic locations and urban-rural environment. We found a moderate negative association with the share of government in the healthcare expenditure, suggesting dissatisfaction derived from the experience with the public health system.

While there was a nation-wide general improvement in the satisfaction level after year 2015, when the 2nd phase of 2009 Health Reform was implemented, the low level of satisfaction among internal migrants and residents in Northeast region

1  
2  
3  
4 remains unchanged. Especially, close attention and further study about the causal  
5 reason of low level satisfaction in Northeast region is recommended.  
6  
7  
8  
9  
10  
11

### 12 **Ethical Statement**

13 The data used in this study is obtained from a publicly available national database.  
14  
15  
16

### 17 **Funding statement**

18 This work was supported by Macao Higher Education Fund, Specialized Subsidy  
19 Scheme for Macao Higher Education Institutions in the Area of Research in  
20 Humanities and Social Sciences.  
21  
22  
23  
24

### 25 **Competing interests statement**

26 No competing financial, professional, or personal interests that might have influenced  
27 the performance or presentation of the work described in this manuscript.  
28  
29  
30

### 31 **Author contributions**

32 JHZ and XP designed the study and developed the methods. XP, JHZ and HZ  
33 reviewed literature. JHZ and XP sorted and analyzed the data. XP prepared the tables.  
34 JHZ, XP and OOI drafted the manuscript. HZ and OOI provided critical review of the  
35 manuscript. All authors have reviewed and approved the final version of the  
36 manuscript for publication.  
37  
38  
39  
40  
41  
42  
43  
44

### 45 **Reference**

46  
47 1 Mossialos E. Citizens' views on health care systems in the 15 member states of the  
48 European Union, *Health Econ* 1997;6:109-16.  
49  
50

51 2 Blendon RJ, Kim M, Benson JM. The public versus the World Health Organization  
52 on health system performance, *Health Aff* 2001;20:10-20.  
53  
54

55 3 AISaud AM, Taddese HB, Filippidis FT. Trends and correlates of the public's  
56 perception of healthcare systems in the European Union: a multilevel analysis of  
57 Eurobarometer survey data from 2009 to 2013, *BMJ Open*  
58 2018;8:e018178,2017-018178.  
59  
60

1  
2  
3 4 Papanicolas I, Cylus J, Smith PC. An analysis of survey data from eleven countries  
4 finds that 'satisfaction' with health system performance means many things, *Health*  
5 *Aff* 2013;32:734-42.  
6  
7

8 5 Footman K, Roberts B, Mills A, et al. Public satisfaction as a measure of health  
9 system performance: a study of nine countries in the former Soviet Union, *Health*  
10 *Policy* 2013;112:62-9.  
11  
12

13 6 Hero JO, Blendon RJ, Zaslavsky AM, et al. Understanding what makes Americans  
14 dissatisfied with their health care system: an international comparison, *Health Aff*  
15 2016;35:502-9.  
16  
17

18 7 Grosso AL, Van Ryzin GG. Public management reform and citizen perceptions of  
19 the UK health system, *International Review of Administrative Sciences*  
20 2012;78:494-513.  
21  
22

23 8 Eggleston K. Health care for 1.3 billion: An overview of China's health system,  
24 2012.  
25  
26

27 9 Liu GG, Vortherms SA, Hong X. China's health reform update, *Annu Rev Public*  
28 *Health* 2017;38:431-48.  
29  
30

31 10 Zhao D, Zhao H, Cleary PD. Understanding the determinants of public trust in the  
32 health care system in China: an analysis of a cross-sectional survey, *J Health Serv Res*  
33 *Policy* 2019;24:37-43.  
34  
35

36 11 Fan JB. Research on the perception structure of residents' satisfaction with public  
37 health service, *East China normal university (philosophy and social science edition)*  
38 2018;50:163-171.  
39  
40

41 12 Wang, Z; Zhou, L; Peng, F. Fiscal expenditure, scale comparison and public  
42 service satisfaction: an analysis based on county-level medical data, *Chinese*  
43 *administration* 2018:14.  
44  
45

46 13 Cheng L. Influencing Factors of Health Service Satisfaction of Urban and Rural  
47 Residents -- An Empirical Analysis Based on 604 Questionnaires in Anhui Province,  
48 *Journal of Yichun University* 2014;36:34-37.  
49  
50

51 14 Tang J. Farmers' satisfaction with rural medical and health services and its  
52 influencing factors -- based on questionnaire survey data of 375 farmers, *Journal of*  
53 *hunan agricultural university: social science edition* 2016;17:2-48.  
54  
55

56 15 Shan L, Zhao M, Ning N, et al. Dissatisfaction with current integration reforms of  
57 health insurance schemes in China: are they a success and what matters? *Health*  
58 *Policy Plan* 2018;33:345-54.  
59  
60

- 1  
2  
3 16 Zhang JH, Yuan J, Wang T. Direct cost of dengue hospitalization in Zhongshan,  
4 China: Associations with demographics, virus types and hospital accreditation, *PLoS*  
5 *neglected tropical diseases* 2017;11:e0005784.  
6  
7  
8 17 Yinzi Jin, Hou Z, Zhang D. Determinants of Health Insurance Coverage among  
9 People Aged 45 and over in China: Who Buys Public, Private and Multiple Insurance,  
10 *PLoS One* 2016;11:e0161774.  
11  
12  
13 18 Brixii H, Mu Y, Targa B, et al. Engaging sub-national governments in addressing  
14 health equities: challenges and opportunities in China's health system reform, *Health*  
15 *Policy Plan* 2012;28:809-24.  
16  
17  
18 19 Ramesh M, Wu X, He AJ. Health governance and healthcare reforms in China,  
19 *Health Policy Plan* 2013;29:663-72.  
20  
21  
22 20 Zhang L, Liu N. Health reform and out-of-pocket payments: lessons from China,  
23 *Health Policy Plan* 2013;29:217-26.  
24  
25  
26 21 Penm J, Li Y, Zhai S, et al. The impact of clinical pharmacy services in China on  
27 the quality use of medicines: a systematic review in context of China's current  
28 healthcare reform, *Health Policy Plan* 2013;29:849-72.  
29  
30  
31 22 Wu D, Lam TP, Lam KF, et al. Challenges to healthcare reform in China:  
32 profit-oriented medical practices, patients' choice of care and guanxi culture in  
33 Zhejiang province, *Health Policy Plan* 2017;32:1241-7.  
34  
35  
36 23 Li L, Fu H. China's health care system reform: Progress and prospects, *Int J Health*  
37 *Plann Manage* 2017;32:240-53.  
38  
39  
40 24 Eggleston K, Ling L, Qingyue M, et al. Health service delivery in China: a  
41 literature review, *Health Econ* 2008;17:149-65.  
42  
43  
44 25 Liu J, Zhang Y. Health status and health disparity in China: a demographic and  
45 socioeconomic perspective, *China Population and Development Studies*  
46 2019;2:301-22.  
47  
48  
49 26 Li X, Lu J, Hu S, et al. The primary health-care system in China, *The Lancet*  
50 2017;390:2584-94.  
51  
52  
53 27 Munro N, Duckett J. Explaining public satisfaction with health-care systems:  
54 findings from a nationwide survey in China, *Health Expectations* 2016;19:654-66.  
55  
56  
57 28 Yu H. Universal health insurance coverage for 1.3 billion people: what accounts  
58 for China's success? *Health Policy* 2015;119:1145-52.  
59  
60

- 1  
2  
3 29 Hesketh T, Wu D, Mao L, et al. Violence against doctors in China, *BMJ*  
4 2012;345:e5730.  
5  
6  
7 30 Wang X, Wang X, Zheng J. How to end violence against doctors in China, *The*  
8 *Lancet* 2012;380:647-8.  
9  
10  
11 31 Shi L, Zhang D, Zhou C, et al. A cross-sectional study on the prevalence and  
12 associated risk factors for workplace violence against Chinese nurses, *BMJ Open*  
13 2017;7:e013105,2016-013105.  
14  
15  
16 32 Burns LR, Liu GG. China's Healthcare System and Reform: Cambridge University  
17 Press 2017.  
18  
19  
20 33 Jiao WP. Diagnosis-Related Groups' Payment Reform in Beijing, *Chin Med J*  
21 *(Engl)* 2018;131:1763-4.  
22  
23  
24 34 Xesfingi S, Vozikis A. Patient satisfaction with the healthcare system: Assessing  
25 the impact of socio-economic and healthcare provision factors, *BMC health services*  
26 *research* 2016;16:94.  
27  
28  
29 35 Stokes J, Gurol-Urganci I, Hone T, et al. Effect of health system reforms in Turkey  
30 on user satisfaction, *J Glob Health* 2015;5:020403.  
31  
32  
33 36 Bleich SN, Özaltin E, Murray CJ. How does satisfaction with the health-care  
34 system relate to patient experience? *Bull World Health Organ* 2009;87:271-8.  
35  
36  
37 37 Vuong Q, Vuong T, Ho T, et al. Psychological and socio-economic factors  
38 affecting social sustainability through impacts on perceived health care quality and  
39 public health: The case of Vietnam, *Sustainability* 2017;9:1456.  
40  
41  
42 38 Lee S, Suh NK, Song J. Determinants of public satisfaction with the National  
43 Health Insurance in South Korea, *Int J Health Plann Manage* 2009;24:131-46.  
44  
45  
46 39 Dong W, Zhang Q, Yan C, et al. Residents' satisfaction with primary medical and  
47 health services in Western China, *BMC health services research* 2017;17:298.  
48  
49  
50 40 He AJ. Public satisfaction with the health system and popular support for state  
51 involvement in an East Asian welfare regime: health policy legitimacy of Hong Kong,  
52 *Social Policy & Administration* 2018;52:750-70.  
53  
54  
55 41 Liu Y, Yuan Z, Liu Y, et al. Changing community health service delivery in  
56 economically less-developed rural areas in China: impact on service use and  
57 satisfaction, *BMJ Open* 2014;4:e004148,2013-004148.  
58  
59  
60 42 Hockenberry JM, Becker ER. How do hospital nurse staffing strategies affect  
patient satisfaction? *ILR Review* 2016;69:890-910.

1  
2  
3 43 Kringos DS, Boerma W, van der Zee J, et al. Europe's strong primary care systems  
4 are linked to better population health but also to higher health spending, *Health Aff*  
5 2013;32:686-94.  
6  
7

8 44 Liu YF, Wang S, Qiao HM. Correlation analysis between the average length of  
9 stay of discharged patients and the utilization rate of hospital beds, *China Health*  
10 *Care&Nutrition* 2012;9:4205-6.  
11  
12

13 45 Folland S, Goodman AC, Stano M. The economics of health and health care:  
14 Taylor & Francis 2017.  
15  
16

17 46 Wennberg JE, Barnes BA, Zubkoff M. Professional uncertainty and the problem of  
18 supplier-induced demand, *Soc Sci Med* 1982;16:811-24.  
19  
20

21 47 Watts BV, Shiner B, Klauss G, et al. Supplier-induced demand for psychiatric  
22 admissions in Northern New England, *BMC Psychiatry* 2011;11:146.  
23  
24

25 48 Meng Q, Fang H, Liu X, et al. Consolidating the social health insurance schemes  
26 in China: towards an equitable and efficient health system, *The Lancet*  
27 2015;386:1484-92.  
28  
29

30 49 Li XP. Is the economic decline in northeast China really the fault of the system?  
31 *Resource Recycling* 2016;7:74-77.  
32  
33

34 50 Zhang S, Zhang W, Zhou H, et al. How China's new health reform influences  
35 village doctors' income structure: evidence from a qualitative study in six counties in  
36 China, *Human resources for health* 2015;13:26.  
37  
38

39 51 Chen H, Shi L, Wang N, et al. Analysis on geographic variations in hospital deaths  
40 and endovascular therapy in ischaemic stroke patients: an observational  
41 cross-sectional study in China, *BMJ Open* 2019;9:e029079,2019-029079.  
42  
43  
44  
45  
46  
47  
48  
49  
50  
51  
52  
53  
54  
55  
56  
57  
58  
59  
60

**Table 1** Descriptive statistics of the respondents in CGSS 2013-2015

Panel A: Respondents

|                                                | Total  | 2013   | 2015   | Chi2  |
|------------------------------------------------|--------|--------|--------|-------|
| N                                              | 15969  | 5566   | 10403  | /     |
| <b>Satisfaction score</b>                      | 68.50  | 66.21  | 69.73  | /     |
| <b>Being satisfied</b>                         | 60.08% | 52.91% | 63.93% | /     |
| <b>Age</b>                                     |        |        |        |       |
| Age (years)                                    | 51.9   | 50.8   | 52.5   | /     |
| Age<60                                         | 63.4%  | 66.4%  | 61.8%  | 32.34 |
| Age>=60                                        | 36.6%  | 33.6%  | 38.2%  |       |
| <b>Gender</b>                                  |        |        |        |       |
| Male                                           | 50.6%  | 50.8%  | 50.5%  | 0.07  |
| Female                                         | 49.4%  | 49.2%  | 49.5%  |       |
| <b>Ethnic group</b>                            |        |        |        |       |
| Han                                            | 92.8%  | 92.4%  | 93.1%  | 2.30  |
| Ethnic minority                                | 7.2%   | 7.6%   | 7.0%   |       |
| <b>Marital status</b>                          |        |        |        |       |
| Single/separated/widow/widower                 | 29.3%  | 28.8%  | 29.6%  | 1.10  |
| Cohabitation/Married                           | 70.7%  | 71.2%  | 70.4%  |       |
| <b>Employment status</b>                       |        |        |        |       |
| Not working                                    | 43.1%  | 39.8%  | 44.9%  | 38.86 |
| Employed/Farm                                  | 56.9%  | 60.3%  | 55.1%  |       |
| <b>Education</b>                               |        |        |        |       |
| Elementary School or less                      | 37.8%  | 36.2%  | 38.7%  | 10.71 |
| Middle / high School                           | 45.6%  | 47.0%  | 44.9%  |       |
| College                                        | 15.5%  | 15.8%  | 15.3%  |       |
| Post graduate                                  | 1.1%   | 1.1%   | 1.1%   |       |
| <b>Self-reported health</b>                    |        |        |        |       |
| Very bad                                       | 3.3%   | 3.4%   | 3.3%   | 49.54 |
| Bad                                            | 15.3%  | 14.4%  | 15.8%  |       |
| Average                                        | 21.6%  | 19.8%  | 22.6%  |       |
| Good                                           | 38.0%  | 37.7%  | 38.1%  |       |
| Very good                                      | 21.8%  | 24.7%  | 20.3%  |       |
| <b>Self-reported household economic status</b> |        |        |        |       |
| Far below average                              | 6.0%   | 5.7%   | 6.2%   | 37.26 |
| Below average                                  | 32.2%  | 30.2%  | 33.3%  |       |
| Average                                        | 53.7%  | 57.0%  | 52.0%  |       |
| Above average                                  | 8.1%   | 7.3%   | 8.2%   |       |
| <b>Insurance status</b>                        |        |        |        |       |
| Without any health Insurance                   | 10.2%  | 11.3%  | 9.6%   | 10.90 |
| With any health insurance                      | 89.8%  | 88.7%  | 90.4%  |       |
| <b>Residence status</b>                        |        |        |        |       |
| Urban                                          | 60.0%  | 59.7%  | 60.2%  | 0.28  |
| Rural                                          | 40.0%  | 40.3%  | 39.8%  |       |



**Internal migrant**

|     |       |       |       |      |
|-----|-------|-------|-------|------|
| No  | 89.0% | 88.7% | 89.2% | 1.09 |
| Yes | 11.0% | 11.3% | 10.8% |      |

**Regions or municipalities**

|                              |       |       |       |       |
|------------------------------|-------|-------|-------|-------|
| East china(without Shanghai) | 23.2% | 23.6% | 23.1% | 37.28 |
| Middle china                 | 23.9% | 22.2% | 24.8% |       |
| West china(without Chongqin) | 21.7% | 21.1% | 22.0% |       |
| NEast china                  | 14.2% | 14.9% | 13.8% |       |
| Beijing                      | 5.1%  | 4.7%  | 5.3%  |       |
| Shanghai                     | 6.2%  | 7.0%  | 5.7%  |       |
| Tianjin                      | 3.2%  | 3.7%  | 3.0%  |       |
| Chongqin                     | 2.6%  | 3.0%  | 2.4%  |       |

**Panel B: Healthcare resources**

|                               | % of healthcare expenditure in GDP |           | Government % in healthcare expenditure |           | Out of pocket(%) |           | hospital beds/10k population |           | healthcare workforce/10k population |           |
|-------------------------------|------------------------------------|-----------|----------------------------------------|-----------|------------------|-----------|------------------------------|-----------|-------------------------------------|-----------|
|                               | Mean                               | Std. Err. | Mean                                   | Std. Err. | Mean             | Std. Err. | Mean                         | Std. Err. | Mean                                | Std. Err. |
| Total                         | 5.48                               | 0.005     | 29.45                                  | 0.029     | 33.12            | 0.031     | 6.05                         | 0.019     | 2.84                                | 0.008     |
| East china (without Shanghai) | 4.24                               | 0.006     | 25.83                                  | 0.034     | 31.89            | 0.041     | 5.96                         | 0.035     | 2.97                                | 0.017     |
| Middle china                  | 5.45                               | 0.005     | 32.84                                  | 0.040     | 36.87            | 0.044     | 5.82                         | 0.038     | 2.36                                | 0.015     |
| West china (without Chongqin) | 6.57                               | 0.008     | 36.54                                  | 0.062     | 32.13            | 0.040     | 5.87                         | 0.043     | 2.38                                | 0.018     |
| NEast china                   | 5.53                               | 0.011     | 24.51                                  | 0.026     | 40.41            | 0.054     | 6.44                         | 0.056     | 2.67                                | 0.019     |
| Beijing                       | 7.21                               | 0.015     | 25.43                                  | 0.040     | 20.45            | 0.058     | 7.48                         | 0.065     | 5.60                                | 0.034     |
| Shanghai                      | 5.59                               | 0.006     | 20.79                                  | 0.017     | 20.22            | 0.024     | 6.89                         | 0.077     | 4.27                                | 0.003     |
| Tianjin                       | 3.97                               | 0.010     | 25.86                                  | 0.027     | 34.20            | 0.089     | 5.36                         | 0.064     | 3.15                                | 0.015     |
| Chongqin                      | 5.64                               | 0.009     | 31.23                                  | 0.013     | 32.22            | 0.164     | 4.26                         | 0.026     | 1.58                                | 0.012     |

**Table 2 Descriptive Statistics of satisfaction about the health system in China (2013-2015)****Panel A**

|                                                | Satisfaction score |      |       |      |       |      |
|------------------------------------------------|--------------------|------|-------|------|-------|------|
|                                                | Total              |      | 2013  |      | 2015  |      |
|                                                | mean               | s.d. | mean  | s.d. | mean  | s.d. |
| <b>Satisfaction score</b>                      | 68.50              | 0.15 | 66.21 | 0.24 | 69.73 | 0.20 |
| <b>Age</b>                                     |                    |      |       |      |       |      |
| Age<60                                         | 67.43              | 0.19 | 65.40 | 0.29 | 68.60 | 0.25 |
| Age>=60                                        | 70.35              | 0.27 | 67.81 | 0.45 | 71.56 | 0.33 |
| <b>Gender</b>                                  |                    |      |       |      |       |      |
| Male                                           | 68.16              | 0.23 | 66.07 | 0.35 | 69.29 | 0.29 |
| Female                                         | 68.84              | 0.21 | 66.35 | 0.34 | 70.17 | 0.27 |
| <b>Ethnic group</b>                            |                    |      |       |      |       |      |
| Han                                            | 68.28              | 0.16 | 65.94 | 0.25 | 69.53 | 0.21 |
| Ethnic minority                                | 71.26              | 0.55 | 69.42 | 0.89 | 72.35 | 0.70 |
| <b>Marital status</b>                          |                    |      |       |      |       |      |
| Single/separated/widow/widower                 | 68.07              | 0.34 | 65.73 | 0.54 | 69.30 | 0.44 |
| Cohabitation/Married                           | 68.67              | 0.17 | 66.40 | 0.27 | 69.91 | 0.22 |
| <b>Employment status</b>                       |                    |      |       |      |       |      |
| Not working                                    | 69.08              | 0.25 | 66.38 | 0.41 | 70.37 | 0.31 |
| Employed/Farm                                  | 68.06              | 0.20 | 66.09 | 0.31 | 69.21 | 0.26 |
| <b>Education</b>                               |                    |      |       |      |       |      |
| Elementary School or less                      | 70.76              | 0.26 | 68.15 | 0.40 | 72.07 | 0.33 |
| Middle / high School                           | 67.53              | 0.23 | 65.50 | 0.36 | 68.68 | 0.30 |
| College                                        | 66.36              | 0.37 | 64.32 | 0.61 | 67.50 | 0.46 |
| Post graduate                                  | 60.69              | 1.58 | 59.17 | 2.54 | 61.45 | 1.99 |
| <b>Self-reported health</b>                    |                    |      |       |      |       |      |
| Very bad                                       | 66.39              | 1.14 | 65.68 | 1.76 | 66.79 | 1.48 |
| Bad                                            | 68.28              | 0.43 | 65.61 | 0.70 | 69.59 | 0.55 |
| Average                                        | 68.18              | 0.34 | 65.43 | 0.55 | 69.48 | 0.42 |
| Good                                           | 68.62              | 0.24 | 66.31 | 0.38 | 69.85 | 0.31 |
| Very good                                      | 69.07              | 0.32 | 67.09 | 0.50 | 70.36 | 0.42 |
| <b>Self-reported household economic status</b> |                    |      |       |      |       |      |
| Far below average                              | 65.26              | 0.86 | 62.69 | 1.56 | 66.51 | 1.03 |
| Below average                                  | 67.16              | 0.29 | 65.19 | 0.47 | 68.12 | 0.37 |
| Average                                        | 69.37              | 0.20 | 66.88 | 0.30 | 70.84 | 0.26 |
| Above average                                  | 70.44              | 0.52 | 67.87 | 0.86 | 71.61 | 0.64 |
| <b>Insurance status</b>                        |                    |      |       |      |       |      |
| Without any health Insurance                   | 65.90              | 0.53 | 64.36 | 0.77 | 66.86 | 0.72 |
| With any health insurance                      | 68.79              | 0.16 | 66.44 | 0.26 | 70.04 | 0.21 |
| <b>Residence status</b>                        |                    |      |       |      |       |      |
| Urban                                          | 67.48              | 0.20 | 67.12 | 0.31 | 67.67 | 0.26 |

|                                  |       |      |       |      |       |      |
|----------------------------------|-------|------|-------|------|-------|------|
| Rural                            | 70.03 | 0.24 | 64.85 | 0.40 | 72.85 | 0.30 |
| <b>Internal migrant</b>          |       |      |       |      |       |      |
| No                               | 68.99 | 0.16 | 66.52 | 0.26 | 70.31 | 0.21 |
| Yes                              | 64.50 | 0.50 | 63.76 | 0.77 | 64.92 | 0.65 |
| <b>Regions or municipalities</b> |       |      |       |      |       |      |
| East china (without Shanghai)    | 68.32 | 0.30 | 67.26 | 0.49 | 68.91 | 0.38 |
| Middle china                     | 70.53 | 0.28 | 66.73 | 0.45 | 72.35 | 0.35 |
| West china (without Chongqin)    | 70.49 | 0.33 | 67.01 | 0.55 | 72.29 | 0.40 |
| NEast china                      | 63.88 | 0.48 | 62.88 | 0.69 | 64.46 | 0.65 |
| Beijing                          | 66.10 | 0.77 | 63.75 | 1.05 | 67.22 | 1.01 |
| Shanghai                         | 64.33 | 0.72 | 62.61 | 1.13 | 65.45 | 0.93 |
| Tianjin                          | 68.84 | 0.78 | 70.60 | 0.79 | 67.66 | 1.18 |
| Chongqin                         | 73.94 | 0.75 | 71.67 | 1.34 | 75.45 | 0.88 |

**Table 2 Descriptive Statistics of satisfaction about the health system in China (2013-2015)**

**Panel B**

|                                | % of being satisfied |       |        |       |        |       |
|--------------------------------|----------------------|-------|--------|-------|--------|-------|
|                                | Total                |       | 2013   |       | 2015   |       |
|                                | mean                 | s.d.  | mean   | s.d.  | mean   | s.d.  |
| <b>Satisfaction</b>            | 60.08%               | 0.44% | 52.91% | 0.78% | 63.93% | 0.52% |
| <b>Age</b>                     |                      |       |        |       |        |       |
| Age<60                         | 57.58%               | 0.54% | 51.41% | 0.93% | 61.13% | 0.66% |
| Age>=60                        | 64.41%               | 0.77% | 55.86% | 1.47% | 68.46% | 0.89% |
| <b>Gender</b>                  |                      |       |        |       |        |       |
| Male                           | 59.56%               | 0.64% | 53.09% | 1.11% | 63.04% | 0.78% |
| Female                         | 60.61%               | 0.61% | 52.72% | 1.12% | 64.83% | 0.72% |
| <b>Ethnic group</b>            |                      |       |        |       |        |       |
| Han                            | 59.70%               | 0.46% | 52.37% | 0.82% | 63.60% | 0.55% |
| Ethnic minority                | 65.00%               | 1.58% | 59.46% | 2.84% | 68.25% | 1.87% |
| <b>Marital status</b>          |                      |       |        |       |        |       |
| Single/separated/widow/widower | 60.02%               | 0.97% | 52.19% | 1.73% | 64.10% | 1.15% |
| Cohabitation/Married           | 60.10%               | 0.48% | 53.20% | 0.86% | 63.85% | 0.58% |
| <b>Employment status</b>       |                      |       |        |       |        |       |
| Not working                    | 61.26%               | 0.69% | 53.10% | 1.29% | 65.14% | 0.80% |
| Employed/Farm                  | 59.18%               | 0.58% | 52.78% | 0.99% | 62.94% | 0.70% |
| <b>Education</b>               |                      |       |        |       |        |       |
| Elementary School or less      | 65.71%               | 0.71% | 56.77% | 1.32% | 70.19% | 0.83% |
| Middle / high School           | 57.56%               | 0.65% | 51.27% | 1.13% | 61.10% | 0.79% |
| College                        | 54.58%               | 1.15% | 49.45% | 2.01% | 57.43% | 1.40% |
| Post graduate                  | 47.99%               | 4.63% | 45.15% | 8.14% | 49.41% | 5.62% |
| <b>Self-reported health</b>    |                      |       |        |       |        |       |
| Very bad                       | 55.10%               | 2.63% | 50.43% | 4.74% | 57.69% | 3.13% |
| Bad                            | 58.02%               | 1.19% | 48.76% | 2.17% | 62.56% | 1.40% |

|                                                |        |       |        |       |        |       |
|------------------------------------------------|--------|-------|--------|-------|--------|-------|
| Average                                        | 58.19% | 0.98% | 50.13% | 1.83% | 61.98% | 1.15% |
| Good                                           | 61.59% | 0.70% | 53.78% | 1.26% | 65.75% | 0.84% |
| Very good                                      | 61.52% | 0.93% | 56.57% | 1.54% | 64.75% | 1.15% |
| <b>Self-reported household economic status</b> |        |       |        |       |        |       |
| Far below average                              | 53.21% | 2.02% | 46.27% | 3.70% | 56.59% | 2.40% |
| Below average                                  | 56.57% | 0.80% | 48.96% | 1.46% | 60.26% | 0.96% |
| Average                                        | 61.97% | 0.59% | 54.62% | 1.03% | 66.30% | 0.71% |
| Above average                                  | 66.66% | 1.47% | 61.12% | 2.72% | 69.19% | 1.74% |
| <b>Insurance status</b>                        |        |       |        |       |        |       |
| Without any health Insurance                   | 52.90% | 1.50% | 46.92% | 2.49% | 56.66% | 1.86% |
| With any health insurance                      | 60.90% | 0.46% | 53.67% | 0.83% | 64.70% | 0.55% |
| <b>Residence status</b>                        |        |       |        |       |        |       |
| Urban                                          | 57.67% | 0.57% | 54.84% | 0.99% | 59.18% | 0.70% |
| Rural                                          | 63.69% | 0.69% | 50.05% | 1.28% | 71.10% | 0.78% |
| <b>Internal migrant</b>                        |        |       |        |       |        |       |
| No                                             | 61.43% | 0.46% | 53.60% | 0.82% | 65.62% | 0.55% |
| Yes                                            | 49.10% | 1.47% | 47.54% | 2.60% | 49.98% | 1.78% |
| <b>Regions or municipalities</b>               |        |       |        |       |        |       |
| East china (without Shanghai)                  | 58.66% | 0.91% | 54.51% | 1.65% | 60.94% | 1.09% |
| Middle china                                   | 66.38% | 0.84% | 55.28% | 1.58% | 71.70% | 0.98% |
| West china (without Chongqin)                  | 64.20% | 0.92% | 53.64% | 1.65% | 69.64% | 1.08% |
| NEast china                                    | 47.22% | 1.22% | 43.13% | 2.10% | 49.59% | 1.50% |
| Beijing                                        | 53.34% | 2.02% | 51.63% | 3.32% | 54.15% | 2.50% |
| Shanghai                                       | 52.52% | 2.04% | 45.36% | 3.33% | 57.20% | 2.48% |
| Tianjin                                        | 65.34% | 2.37% | 66.85% | 3.47% | 64.33% | 3.18% |
| Chongqin                                       | 74.93% | 2.46% | 68.61% | 4.55% | 79.12% | 2.73% |

**Note:** "Being satisfied" is a dummy variable, taking the value of "1" if a respondent's satisfaction score is greater than 70 points.

**Table 3. Baseline analysis (logistic regression)**

Dep. Var. = "Being Satisfied"

| Variables                                      | Odds ratio | P-value | [95% Conf. Interval] |
|------------------------------------------------|------------|---------|----------------------|
| <b>Demographic</b>                             |            |         |                      |
| Age $\geq$ 60                                  | 1.19       | 0.000   | 1.08 - 1.32          |
| Female                                         | 1.03       | 0.513   | 0.95 - 1.11          |
| Cohabitation/Married                           | 0.93       | 0.108   | 0.84 - 1.02          |
| Han (Ethnic group)                             | 1.28       | 0.001   | 1.11 - 1.49          |
| Rural                                          | 1.23       | 0.009   | 1.05 - 1.44          |
| Internal migrant                               | 0.75       | 0.000   | 0.66 - 0.85          |
| Employed/Farm                                  | 0.97       | 0.452   | 0.89 - 1.06          |
| With any health insurance                      | 1.18       | 0.011   | 1.04 - 1.35          |
| <b>Education</b>                               |            |         |                      |
| Primary school / no formal edu.                | Ref.       |         |                      |
| Middle / high School                           | 0.76       | 0.000   | 0.69 - 0.83          |
| College                                        | 0.65       | 0.000   | 0.57 - 0.75          |
| Post graduate                                  | 0.55       | 0.002   | 0.37 - 0.80          |
| <b>Self-reported health</b>                    |            |         |                      |
| Very bad                                       | Ref.       |         |                      |
| Bad                                            | 1.04       | 0.721   | 0.82 - 1.32          |
| Average                                        | 1.18       | 0.163   | 0.93 - 1.49          |
| Good                                           | 1.45       | 0.002   | 1.15 - 1.83          |
| Very good                                      | 1.61       | 0.000   | 1.27 - 2.04          |
| <b>Self-reported household economic status</b> |            |         |                      |
| Far below average                              | Ref.       |         |                      |
| Below average                                  | 1.21       | 0.037   | 1.01 - 1.45          |
| Average                                        | 1.59       | 0.000   | 1.33 - 1.90          |
| Above average                                  | 2.05       | 0.000   | 1.64 - 2.55          |
| <b>Resources</b>                               |            |         |                      |
| healthcare expenditure % in GDP                | 1.13       | 0.000   | 1.05 - 1.20          |
| Government % in healthcare expenditure         | 0.97       | 0.000   | 0.95 - 0.98          |
| Out of pocket %                                | 1.00       | 0.570   | 0.99 - 1.02          |
| Hospital beds/10k population                   | 1.04       | 0.057   | 1.00 - 1.08          |
| Healthcare workforce/10k population            | 0.92       | 0.117   | 0.83 - 1.02          |
| <b>Region</b>                                  |            |         |                      |
| East china (without Shanghai)                  | Ref.       |         |                      |
| Middle china                                   | 1.36       | 0.001   | 1.14 - 1.62          |

|                                  |        |       |      |   |      |
|----------------------------------|--------|-------|------|---|------|
| West china (without<br>Chongqin) | 1.28   | 0.019 | 1.04 | - | 1.58 |
| Northeast china                  | 0.49   | 0.000 | 0.41 | - | 0.59 |
| Beijing                          | 0.83   | 0.342 | 0.56 | - | 1.22 |
| Shanghai                         | 0.71   | 0.034 | 0.52 | - | 0.98 |
| Tianjin                          | 1.48   | 0.001 | 1.17 | - | 1.86 |
| Chongqing                        | 2.03   | 0.000 | 1.50 | - | 2.76 |
| <b>Year</b>                      |        |       |      |   |      |
| Year2013                         | Ref.   |       |      |   |      |
| Year2015                         | 1.51   | 0.000 | 1.36 | - | 1.66 |
| <b>Constant</b>                  | 0.73   | 0.437 | 0.33 | - | 1.61 |
| <b>Observations</b>              | 15,969 |       |      |   |      |
| <b>R-squared</b>                 | 0.07   |       |      |   |      |

**Note:** Dep. Var. "Being satisfied" is a dummy variable, taking the value of "1" if a respondent's satisfaction score is greater than 70 points.

**Table 4 Regression of Resource, Rural & Years with Being Satisfied**

Dep. Var. = "Being Satisfied"

**Panel A**

| Variables                                   | Odds ratio | P-value | [95% Conf. Interval] |      |
|---------------------------------------------|------------|---------|----------------------|------|
| Hospital beds/10k population * Rural        | 1.26       | 0.002   | 1.09                 | 1.47 |
| Healthcare workforce/10k population * Rural | 0.96       | 0.545   | 0.84                 | 1.09 |
| Rural                                       | 1.12       | 0.243   | 0.93                 | 1.34 |
| <b>Constant</b>                             | 0.24       | 0.001   | 0.10                 | 0.54 |
| <b>Observations</b>                         | 15,969     |         |                      |      |

**Note:** The regression has controlled all other variables as listed in Table 3.**Panel B**

| Variables           | Odds ratio | P-value | [95% Conf. Interval] |      |
|---------------------|------------|---------|----------------------|------|
| Rural               | 1.00       | 0.982   | 0.83                 | 1.20 |
| Rural* Year 2015    | 1.57       | 0.000   | 1.30                 | 1.90 |
| Year 2015           | 1.24       | 0.001   | 1.09                 | 1.41 |
| <b>Constant</b>     | 0.92       | 0.845   | 0.42                 | 2.05 |
| <b>Observations</b> | 15,969     |         |                      |      |

**Note:** The regression has controlled all other variables as listed in Table 3.

**Table 5 Regression of Region & Years with Being Satisfied**

Dep.Var.= "Being Satisfied"

| Variables                               | Odds ratio | P-value | [95% Conf. Interval] |      |
|-----------------------------------------|------------|---------|----------------------|------|
| Year 2015                               | 1.23       | 0.022   | 1.03                 | 1.46 |
| East china (without Shanghai)           |            |         |                      |      |
| Middle china                            | 1.00       | 0.989   | 0.79                 | 1.27 |
| West china (without Chongqin)           | 0.99       | 0.955   | 0.76                 | 1.29 |
| NEast china                             | 0.46       | 0.000   | 0.36                 | 0.60 |
| Beijing                                 | 0.83       | 0.437   | 0.52                 | 1.32 |
| Shanghai                                | 0.62       | 0.065   | 0.38                 | 1.03 |
| Tianjin                                 | 1.72       | 0.004   | 1.20                 | 2.49 |
| Chongqing                               | 1.67       | 0.036   | 1.03                 | 2.69 |
| Year2015* East china (without Shanghai) |            |         |                      |      |
| Year2015*Middle china                   | 1.60       | 0.000   | 1.27                 | 2.02 |
| Year2015*West china (without Chongqin)  | 1.44       | 0.002   | 1.14                 | 1.82 |
| Year2015*NEast china                    | 1.07       | 0.610   | 0.82                 | 1.40 |
| Year2015* Beijing                       | 0.93       | 0.715   | 0.64                 | 1.35 |
| Year2015*Shanghai                       | 1.18       | 0.469   | 0.76                 | 1.83 |
| Year2015*Tianjin                        | 0.77       | 0.289   | 0.48                 | 1.24 |
| Year2015* Chongqin                      | 1.30       | 0.366   | 0.74                 | 2.30 |
| Constant                                | 0.93       | 0.862   | 0.42                 | 2.06 |
| Observations                            | 15,969     |         |                      |      |

**Note:** The regression has controlled the same variables as in Table 3.



# BMJ Open

## Public satisfaction with the healthcare system in China during 2013-2015: A cross-sectional survey of the associated factors

|                                 |                                                                                                                                                                                                                                                                                                                                                                           |
|---------------------------------|---------------------------------------------------------------------------------------------------------------------------------------------------------------------------------------------------------------------------------------------------------------------------------------------------------------------------------------------------------------------------|
| Journal:                        | <i>BMJ Open</i>                                                                                                                                                                                                                                                                                                                                                           |
| Manuscript ID                   | bmjopen-2019-034414.R1                                                                                                                                                                                                                                                                                                                                                    |
| Article Type:                   | Original research                                                                                                                                                                                                                                                                                                                                                         |
| Date Submitted by the Author:   | 25-Mar-2020                                                                                                                                                                                                                                                                                                                                                               |
| Complete List of Authors:       | Zhang, Jing Hua; Macau University of Science and Technology<br>peng, xinxin; Macau University of Science and Technology<br>Liu, Chengkun; Macau University of Science and Technology<br>Chen, Yijun; Macau University of Science and Technology<br>Zhang, Hongmin; Macau University of Science and Technology<br>Iwaloye, Ojo; Macau University of Science and Technology |
| <b>Primary Subject Heading</b>: | Health policy                                                                                                                                                                                                                                                                                                                                                             |
| Secondary Subject Heading:      | Health services research                                                                                                                                                                                                                                                                                                                                                  |
| Keywords:                       | public satisfaction, health system in China, rural health, Health policy < HEALTH SERVICES ADMINISTRATION & MANAGEMENT                                                                                                                                                                                                                                                    |
|                                 |                                                                                                                                                                                                                                                                                                                                                                           |

SCHOLARONE™  
Manuscripts

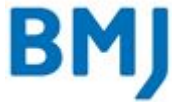

I, the Submitting Author has the right to grant and does grant on behalf of all authors of the Work (as defined in the below author licence), an exclusive licence and/or a non-exclusive licence for contributions from authors who are: i) UK Crown employees; ii) where BMJ has agreed a CC-BY licence shall apply, and/or iii) in accordance with the terms applicable for US Federal Government officers or employees acting as part of their official duties; on a worldwide, perpetual, irrevocable, royalty-free basis to BMJ Publishing Group Ltd ("BMJ") its licensees and where the relevant Journal is co-owned by BMJ to the co-owners of the Journal, to publish the Work in this journal and any other BMJ products and to exploit all rights, as set out in our [licence](#).

The Submitting Author accepts and understands that any supply made under these terms is made by BMJ to the Submitting Author unless you are acting as an employee on behalf of your employer or a postgraduate student of an affiliated institution which is paying any applicable article publishing charge ("APC") for Open Access articles. Where the Submitting Author wishes to make the Work available on an Open Access basis (and intends to pay the relevant APC), the terms of reuse of such Open Access shall be governed by a Creative Commons licence – details of these licences and which [Creative Commons](#) licence will apply to this Work are set out in our licence referred to above.

Other than as permitted in any relevant BMJ Author's Self Archiving Policies, I confirm this Work has not been accepted for publication elsewhere, is not being considered for publication elsewhere and does not duplicate material already published. I confirm all authors consent to publication of this Work and authorise the granting of this licence.

## Title Page

**Article title: Public satisfaction with the healthcare system in China during  
2013-2015: A cross-sectional survey of the associated factors**

### **Authors:**

Jing Hua Zhang\*<sup>1</sup>, Xinxin Peng<sup>1</sup>, Chengkun Liu<sup>1</sup>, Yijun Chen, Hongmin Zhang<sup>1</sup>, Ojo  
Olukayode Iwaloye<sup>1</sup>

**Affiliation:** 1 School of Business, Macau University of Science and Technology,  
Macao S.A.R., China

**\*Correspondence** to Dr. Jing Hua Zhang, [jhuzhang@must.edu.mo](mailto:jhuzhang@must.edu.mo)

School of Business

Macau University of Science and Technology

Macau S.A.R., China

Tel: (+853) 8897-2986

Fax: +853 2882-7666

**Keywords:** public satisfaction, healthcare system in China, rural health, health policy

**Word count:** 4305

1  
2  
3  
4  
5  
6  
7  
8  
9  
10  
11  
12  
13  
14  
15  
16  
17  
18  
19  
20  
21  
22  
23  
24  
25  
26  
27  
28  
29  
30  
31  
32  
33  
34  
35  
36  
37  
38  
39  
40  
41  
42  
43  
44  
45  
46  
47  
48  
49  
50  
51  
52  
53  
54  
55  
56  
57  
58  
59  
60

## Public satisfaction with the healthcare system in China during 2013-2015: A cross-sectional survey of the associated factors

### Abstract

**Objective** We explore how public satisfaction with the healthcare system in China varies with social and economic factors, especially within regional variations and changes during 2013 to 2015.

**Design** Population-based, cross-sectional survey performed between July 2013 and July 2015.

**Setting** General population of China during 2013 to 2015

**Participants** 15,969 total participants (women=49.4%, sample-weighted average age =51.9)

**Primary outcome measure** Public satisfaction with the healthcare system, defined as “being satisfied” if a respondent’s satisfaction score  $\geq 70$  points

**Results** 1) The two-year mean of the satisfaction score of the sample is 68.5 out of 100 points and the score in 2015 is higher than 2013 by 3.5 points. 2) Senior respondents (OR=1.19,  $p<0.001$ ), rural respondents (OR=1.23,  $p=0.009$ ) and those with higher socioeconomic status are more likely to report being satisfied. Internal migrants (OR=0.75,  $p<0.001$ ) and those with a higher level of education are less likely to report being satisfied. 3) Total health expenditure as percentage of GDP and density of hospital beds have a significant positive association with satisfaction (OR=1.13,  $p<0.001$ ). Meanwhile, the government’s share in total healthcare expenditures has a moderately negative association with satisfaction (OR=0.97,  $p<0.001$ ). In rural areas, the density of hospital beds has a positive association with satisfaction (OR=1.26,  $p=0.002$ ). 4) The Northeast region and Shanghai (OR =0.49,  $p<0.001$ ; OR=0.71,  $p=0.034$ ) are less likely to report being satisfied, and remained unchanged in 2015.

**Conclusion** There are considerable disparities in public satisfaction with the healthcare system in China, associated with demographic and socioeconomic characteristics, regional locations, urban-rural environment, and regional health resource abundance. Actions are recommended to improve satisfaction with the public healthcare system, especially in the Northeast region of China.

### Strengths and limitations of this study

- Public satisfaction with healthcare systems has been considered one of the most coherent indicators of the general subjective evaluation of the healthcare system and effectiveness of the reform.
- This study analyzed a national representative sample of more than 15,969 respondents from two waves of surveys during the ongoing healthcare reform.
- This study provides empirical evidence about the rural-city disparity and the regional variations in healthcare satisfaction in China, which have not yet been well studied.
- The survey dataset contains only one global satisfaction score, making it difficult to further attribute the satisfaction or dissatisfaction to specific reform actions or issues of the healthcare system.
- Public satisfaction may be biased by confounding factors such as media reports and political discussion, or the citizens' expectations.

## Public satisfaction with the healthcare system in China during 2013-2015: A cross-sectional survey of the associated factors

### INTRODUCTION

Public satisfaction with healthcare systems measures the general population's satisfaction. Unlike patient satisfaction, which focuses on those who directly utilize the healthcare services, public satisfaction has been considered one of the most coherent indicators of the general subjective evaluation of the healthcare system, as well as the acceptability and effectiveness of healthcare reform[1, 2]. A Public satisfaction indicator has several advantages. First, it gathers information on satisfaction from the whole population, including both direct users and non-users of healthcare services. Second, it represents a mixture of citizens' personal experiences with the healthcare system, beyond the provision of quality services[2]. It may also include the broader views of the social affairs in the country, social welfare culture and media portrayals of the healthcare system[3, 4]; Third, it may affect how the general population utilizes services and their trust in the system[5].

In short, public satisfaction with a healthcare system has become integral to cross-country and across-time comparisons of healthcare systems[3, 4, 6], as well as healthcare policy evaluations[4, 7]. During the past decade, studies about public satisfaction have received increasing attention, reflecting the shift towards a people-centered healthcare system and the emphasis on the responsiveness of the system[4].

For decades the priority of the healthcare system in China has been set to meet basic survival needs, such as reducing mortality[8, 9]. Public satisfaction was not included in any official measurement in China. However, since China has achieved a rapid decline in mortality and an unprecedented increase in life expectancy over the past decade, the issue of public satisfaction in China, among many other aspects of the healthcare system, has received increased attention. The phenomenally intense physician-patient relationship has further fueled interest in public satisfaction [8-10]. This has led to the goal of People-centered Integrated Care as the focus of the

1  
2  
3  
4 transition to Healthy China 2030, the new healthcare reform program.

5  
6 Currently, there is only a small body of literature studying the public satisfaction of  
7  
8 the healthcare system in China and its related factors[11, 12]. Most are only based on  
9  
10 small survey samples at the province level[13, 14]. Some studies focus on public  
11  
12 dissatisfaction with the integration reforms of health insurance schemes[15]. To our  
13  
14 knowledge, no prior studies have systematically examined the nation-wide public  
15  
16 satisfaction of the healthcare system upon the second phase of healthcare reform from  
17  
18 2013 to 2015.

19  
20 Specifically, the objectives of this study are: (1) to explore the basic factors  
21  
22 (demographic, socioeconomic and public healthcare resources) associated with public  
23  
24 satisfaction of the healthcare system in China; (2) to examine how public satisfaction  
25  
26 with the healthcare system differs between the urban and rural residents, as well as in  
27  
28 the major economic regions of China; (3) to examine changes in public satisfaction  
29  
30 with the healthcare system between 2013 and 2015.

## 31 32 **HEALTHCARE SYSTEM AND REFORM BACKGROUND FOR CHINA**

### 33 34 *Institution Background*

35  
36 The healthcare system in China is largely a public hospital-based delivery system  
37  
38 under the administration of the National Health Commission of the People's Republic  
39  
40 of China [16]. In China, public hospitals provide more than 90% of healthcare  
41  
42 services[9]. A national accreditation system classifies hospitals into primary,  
43  
44 secondary and tertiary levels according to characteristics such as numbers of beds,  
45  
46 professional healthcare force, diagnosis and treatment equipment, and operational  
47  
48 area sizes[16]. The basic health insurance coverage in China provided by three major  
49  
50 national health insurance systems has increased significantly during the past decade  
51  
52 and has reached 98% of the whole population in recent years[17].

### 53 54 *Existing Issues and challenges*

55  
56 There has been a large volume of literature produced about the reform of China's  
57  
58 healthcare system in the past decades[8, 18-23]. Due to the privatization and  
59  
60 market-oriented reform of the healthcare system in China during the 1980s and 1990s,

1  
2  
3  
4 by the first decade of the 2000s, there were widespread complaints about unaffordable  
5 basic healthcare services and difficulties with basic healthcare access[23, 24]. The  
6 disparity in healthcare status had gradually increased across the country and become a  
7 major public policy concern[25]. Meanwhile, due to the fast growth of the economy  
8 and residents' income, together with rapid urbanization in China, there has been an  
9 increasingly unmet demand for healthcare services along with higher expectations for  
10 the quality and experience of the healthcare system[26].

11  
12 The major issues with the system late in the first decade of the 2000s can be  
13 summarized as follows: (1) Rising healthcare costs and a high ratio of out-of-pocket  
14 expenditure. In 2013, the reimbursement rates for inpatient care were in the range of  
15 50% to 69%, according to a resident's health insurance type, which was based on the  
16 permanent residence registration system (rural or urban "Hukou") and/or employment  
17 status[17, 27]. (2) There are large socioeconomic disparities and geographic inequities  
18 in healthcare source allocation and utilization, especially between the urban and rural  
19 areas[9]. (3) The financial incentive in the reimbursement of and fee-for-service (FFS)  
20 payment models led to excessive treatment and over prescription[9, 28]. As  
21 a consequence, there has arisen a deep distrust of physicians by the public[8, 10, 26].  
22 (4) Difficulties in healthcare access. Despite the financial incentive of the  
23 reimbursement of health insurance, no strict referral or gate-keeping system has been  
24 enforced in China yet. Patients are still free to self-refer to preferred hospitals  
25 regardless of the severity of their sickness[26]. As a result, almost all major hospitals  
26 in China are over demanded and operate over their capacity. While a patients' clinic  
27 wait time could be as long as a full day, physicians were overloaded and could only  
28 ration a few minutes to meet with a patient for technical diagnosis assistance. This  
29 minimal physician-patient interaction was perceived by patients as poor service  
30 quality and further deteriorated the patient-physician relationship[9]. Together with  
31 the deep mistrust and frustration on the part of the public, there had been rising  
32 numbers of violent incidents against healthcare professionals in the early  
33 2000's[29-31].



### ***2009 Healthcare Reform in China***

In 2009, the Chinese government launched a new wave of healthcare reform actions as part of “the 12<sup>th</sup> Five-Year Plan”, aiming to establish a basic universal healthcare system of safe, effective and affordable service by 2020. To achieve this objective, the government set priorities for achievements in five major areas, including (a) expanding public health insurance, (b) establishment of an Essential Drug System (c) reforming public hospitals, (d) providing primary healthcare service, and (e) equity of public healthcare services[9].

The healthcare reform was implemented in two sequential phases: (1) The first phase (2009 to 2012) aimed to reallocate resources to healthcare development, to expand the coverage of basic health insurance, and to set up an Essential Drug System. (2) The second phase (2013 to 2015) focused on reforming public hospitals, including the pricing models of healthcare services and prescription drugs[23]. To remove the financial incentives of overprescribing, a Zero-Mark-up Drug Policy was implemented among provincial public hospitals (the tertiary-level hospitals) during 2013-2015, after pilot tests in county hospitals in 2012[23].

The implementation of the healthcare reform has varied across provinces and regions in China[32]. Firstly, the governments of provinces and cities had the discretion to tailor the service level according to the availability of local fiscal budgets[9]. Secondly, some reform actions were first experimented with as pilot projects in selected cities or provinces. For example, public hospitals in Beijing started diagnosis-related groups (DRGs) payment reform starting in 2011[9, 33]. 100 pilot cities ran a drug-zero-markup policy from 2012 to 2015.

## **METHOD**

### ***Data availability statement***

The survey data analyzed in this study is the Chinese General Social Survey (CGSS), a national representative continuous survey project available in China since 2003, publicly downloadable at <http://www.cnsda.org/index.php>.

The data of healthcare resources and expenditure on the provincial level were obtained from the China Public Health Statistical Yearbook 2013 and 2015, accessible through subscription-based databases

(<http://cdi.cnki.net/Titles/SingleNJ?NJCode=N2010090866>)

### ***Data source introduction***

The CGSS aims to collect dynamic information about Chinese residents' life quality. It first included a single question about public satisfaction with the healthcare system in 2013, and then in 2015 included a set of detailed questions about public satisfaction regarding various aspects of public healthcare provision. The timing of these two surveys matched well with the agenda of the 2nd phase of the 2009 Healthcare Reform, and thus has provided good opportunities to study how public satisfaction has changed after the implementation of the reform. These data are the latest available ones containing public satisfaction with the healthcare system in China. This study adopts the combined datasets from the two waves in 2013 and 2015.

Administered throughout all 31 provinces and municipalities in China, both waves of the CGSS surveys adopted the same multi-stage stratified sampling design. The Primary Sampling Unit (PSU) is a county-level unit and there are 2,762 PSUs in the sampling frame. In each wave, the CGSS sampled about 12,000 households and a KISH grid procedure was used to randomly select one adult respondent (18 years of age or older) from each household for a face-to-face in-home interview. Sampling weights were included to reflect the general population parameters of the survey year. The final sample contains 15,969 observations from the CGSS 2013 and 2015 combined, after deleting observations with important missing variables. There are only 5566 observations from the 2013 wave because the CGSS 2013 was designed to sample only about half of all respondents to answer the public healthcare satisfaction survey.

### ***Data analysis and ethical considerations***

The Chinese General Social Survey (CGSS), the main data analyzed in this study, was originally collected by the National Survey Research Center at Renmin University of China. The CGSS abides by the Statistics Law of the People's Republic of China. The publicly disclosed survey data has been anonymized, following rigorous ethical practice and academic standards. As for the public healthcare resource data used in this study, they are obtained from the China Public Health Statistical Yearbook, another government publication.

1  
2  
3 This study analyzes the above-mentioned of publicly available ethical data and did not  
4 collect any individual data directly. Therefore, this study did not require extra ethics  
5 approval.  
6  
7

### 8 ***Patient and public involvement***

9  
10 In the survey performed by the CGSS, the general population in all 31 provinces and  
11 municipalities in China were sampled to respond to administered questionnaires about  
12 their living conditions and social activities. The respondents were informed in writing  
13 about the aim of the survey and how their privacy and information rights were  
14 protected legally. Detailed information can be found in the questionnaire disclosed in  
15 the database.  
16  
17

18  
19 No patients were directly involved in this study. No experimental designs were  
20 involved.  
21  
22  
23

### 24 ***Dependent variable***

25  
26 Public satisfaction with the healthcare system. The measurement is based on the  
27 single question, ‘Taking all aspects into consideration, what is your general  
28 satisfaction with the healthcare system?’ Respondents were asked to assign a score  
29 between 0 to 100, with ‘0’ representing totally unsatisfied and ‘100’ for totally  
30 satisfied. As reported in Table 1, the average satisfaction score of the whole sample is  
31 68.5. It is observed that the satisfaction scores of most responses concentrated on four  
32 integrals such as 50, 60, 70, and 80 points. In Chinese culture, 60 points mean  
33 “Passing/neutral”, 70 points means “good, satisfied”, 80 points and above means  
34 “very good, very satisfied”. 40% of the respondents reported a satisfaction score  
35 higher than 70 points.  
36  
37

38 To be consistent with the literature[5, 34], a dummy variable of “being satisfied” was  
39 constructed, taking the value of ‘1’ if a respondent’s satisfaction score is greater than  
40 or equal to 70 points[34].  
41  
42  
43  
44

### 45 ***Independent variables***

46  
47 Demographic and socioeconomic characteristics. Control variables included gender  
48 (1= female), age group (1= those equal to or older than 60 years), minority ethnic  
49 group (1= Yes ), marital status (1= married/living together), and education level ( a  
50 category variable). General physical health condition was measured by a single item:  
51 ‘How do you evaluate your health condition overall?’ Respondents rated on a  
52  
53  
54  
55  
56  
57  
58  
59  
60

1  
2  
3 five-point Likert scale (1=very unhealthy, 2 = unhealthy, 3 = so-so, 4 = healthy, and 5  
4 = very healthy). Socioeconomic information included living area (urban or rural),  
5 internal migrant status (1=Yes), employment status (employed =1), primary health  
6 insurance status (1=Yes) and basic pension status (1=Yes). Household  
7 social-economic status was measured as ‘below the average’, ‘middle class’,  
8 ‘middle-high’, and ‘high’, according to the respondent’s answer to a single item:  
9 ‘How do you assess your relative economic condition in the society?’.

10 Healthcare resources on an aggregated level. Key indicators of the public healthcare  
11 resources included total health expenditure as a percentage of GDP, the government’s  
12 percentage of total expenditure on healthcare, out-of-pocket percentage of individuals,  
13 the densities of the health workforce and hospital beds[4] (per 1,000 population) in  
14 rural and urban areas of each province respectively.

15 Year and region dummy variables. Dummy variables were included to identify the  
16 major economic regions in China (East, Central, West, and Northeast regions)  
17 according to the official classification standard, as well as the municipalities (Beijing,  
18 Shanghai, Tianjin, and Chongqing), which have relatively abundant healthcare  
19 resources and are also the pilot cities of some healthcare reforms. A dummy variable  
20 was included to identify the survey wave of the year 2015.

### 21 *Statistical analysis*

22 The baseline model is a multivariate logistic regression model[4, 5, 35, 36], analyzing  
23 the major factors associated with China residents’ satisfaction with the healthcare  
24 system. The dependent variable was the dummy variable of “being satisfied” with the  
25 healthcare system. The independent variables included all individual and provincial  
26 level variables as introduced in the Measures section.

27 In step two, interaction terms of rural and healthcare resource variables were  
28 constructed to examine the rural disparities. An interaction term for the rural area and  
29 a year dummy for 2015 was also constructed to examine how the satisfaction in rural  
30 areas changed between the years 2013 and 2015.

31 In step three, interaction terms of region dummies and year 2015 were adopted to  
32 examine the changes in the geographic variations over time. All regressions were  
33 conducted in STATA 15, weight-adjusted, using the survey weights provided in the  
34 original datasets.

## RESULTS

### *Descriptive statistics*

Table 1 reports the demographic statistics of the participants (Panel A) and summary information of the healthcare resources in various regions of China (Panel B). The total observation numbers are weight-adjusted, using the survey weights provided in the original datasets.

As reported in Table 2, the mean satisfaction score of the sample is 68.5 out of 100 points. The scores in 2013 and 2015 are 66.2 and 69.7 respectively. Panel B of Table 2 reports the percentage of respondents who scored above 70 points and are classified as “being satisfied with the healthcare system”. This ratio was 52.9% in 2013, then 63.9% in 2015, suggesting that public satisfaction with the healthcare system in China had made general improvement during the study period.

### *Baseline analysis*

Table 3 reports the logistic regression results of the demographic characteristics of the baseline analysis. Senior respondents (older than or equal to 60 years) are significantly more likely, by 19 percentage points (OR=1.19,  $p<0.001$ ), to report being satisfied with the healthcare system.

Respondents from rural areas on average are more likely to report being satisfied (OR=1.23,  $p=0.009$ ). Those from ethnic minority groups, with basic health insurance [37, 38], with better self-reported health, or with higher self-rated social-economic status, are at greater odds of reporting being satisfied. Meanwhile, internal migrants (OR=0.75,  $p<0.001$ ) and those with a higher level of education[27] are less likely to report being satisfied.

As for the association with province-level health resources and expenditures, higher total health expenditure as a percentage of GDP and density of hospital beds are significantly associated with a higher probability of reporting as being satisfied (OR=1.13,  $p<0.001$ ). Meanwhile, the government’s share in total healthcare expenditure has a moderately negative association with satisfaction (OR=0.97,  $p<0.001$ ). Out-of-pocket percentage and the density of the healthcare workforce are insignificant.

Additionally, in the year 2015, the respondents were on average more likely than in the year 2013 by 51 percentage points to report being satisfied.

### ***Rural disparities and changes***

As reported in Panel A of Table 4, in the rural area the density of hospital beds is positively associated with higher satisfaction (OR=1.26, p= 0.002). The effect is even stronger than the main effect (OR=1.02, p= 0.057) in Table 3. The density of the healthcare workforce in rural areas or the dummy variable rural area is not significant in this specification.

Panel B reports the changes in rural areas during the period from 2013 to 2015. The coefficients of Rural\*2015 indicates that rural residents are more likely by 57 percentage points in 2015 to report being satisfied (OR=1.57, p<0.001). After including the interaction term of rural areas and year 2015, the odds ratio of the rural area is reduced to be 1.00 and totally insignificant, while the Year 2015 is still significant though its odds ratio became smaller.

### ***Regional variations***

As shown in Table 3, with East China as the baseline region, Middle and West China regions (OR=1.36, p=0.001; OR=1.28, p=0.019), together with Tianjin and Chongqing municipalities (OR=1.48, p=0.001; OR=2.03, p<0.001), are on average more likely to report being satisfied. On the other hand, the Northeast region and Shanghai (OR=0.49, p<0.001; OR=0.71, p=0.034) are less likely by about 51 to 30 percentage points respectively. Beijing is not significantly different from the East region.

After the interaction terms of Year 2015 and regions are controlled, the results reported in Table 5 indicate that the differences in Middle and West China regions are no longer significant, but the differences in Tianjin, Chongqing, Shanghai and the Northeast region of China are robust and consistent.

### ***Changes in 2015***

The dummy variable Year 2015 captures the average changes in the public satisfaction. As reported in Table 3 and Table 5, the odds ratios of Year 2015 are 1.36 and 1.23 respectively, highly significant in both specifications.

In 2015, after controlling for the average year effect and region effects, respondents from the Middle (OR=1.60, p<0.001) and the West China regions (OR=1.44, p=0.002) are significantly more likely to report being satisfied than those from the base group

of East China region. Meanwhile, there was no significant improvement in the Northeast region or Shanghai City, though respondents from these two regions tend to report being less satisfied.

## Discussion

### *Demographic and socioeconomic characteristics*

The association relationships between the various demographic characteristics and the public satisfaction with the healthcare system found in this study are all consistent with existing literature. For example, seniors[27, 39], those with better self-rated health[37], and those with higher social economic status[40] are more likely to report being satisfied[13, 14]. Those are with a lower level of education[27] and those in rural areas[27, 35] are more likely to report being satisfied too[14].

This phenomenon may be explained by the role of the respondents' expectations [3, 5, 36]. Residents with a lower level of education and in rural areas of China have had a lower level of expectation. In past decades, they only had very limited access to public healthcare resources and social welfare. Also, they are usually unaware of their citizenship entitlements or patient rights[17, 27, 41].

### *Healthcare resources*

Generally, a larger healthcare workforce and more resources are associated with a higher level of public satisfaction with the healthcare system[42, 43]. However, this study has mixed findings.

- 1) There are positive associations between public satisfaction and the expenditure on healthcare as a percentage of GDP, as well as the density of hospital beds. These findings are consistent with the general perception in the literature[4, 34, 42, 43].
- 2) A higher level of healthcare professionals in the population usually appears to increase overall patient satisfaction[34, 44, 45] , however, the estimates of this factor are not statistically significant in this study. Actually, the higher quality of public hospitals in the developed regions of China has attracted patients from all over the country and is always overcrowded and experiencing overcapacity situations[9].Hence, the nominal healthcare professional density in the population may not reflect the actual healthcare resources accessible by the permanent residents in those areas.
- 3) Generally, a lower out of pocket expense is preferred by the population [34, 44].

1  
2  
3 However, this study found no significant role from the ratio of out of pocket  
4 expenses. This study has found that there is a moderate negative association with  
5 the share of government expenditure on satisfaction with healthcare. This finding  
6 is different from those in European countries[4, 34, 45]. There could be several  
7 potential explanations about this paradox. First, the negative association may  
8 reflect the shares of government expenditures in poorer regions, which have  
9 increased as the result of healthcare reform in China. However, it takes a longer  
10 time and it is a challenging, systematic task to improve the public satisfaction with  
11 the healthcare system in those areas. Second, accessing preferred care is highly  
12 important to the satisfaction of some citizens[6], but healthcare choices are further  
13 limited when the government is taking a greater share of the expenditure. For  
14 example, with the implementation of the Essential Drug Lists and Drug  
15 Zero-mark-up policy in public hospitals in China, the availability of preferred  
16 therapies are limited[3, 23]. Third, there is also the possibility that some  
17 government expenditure on healthcare may have not been allocated appropriately  
18 or efficiently. For instance, the funding may have been allocated to sophisticated  
19 but unnecessary medical equipment. Future research should continue to explore  
20 and investigate this phenomenon.  
21  
22  
23  
24  
25  
26  
27  
28  
29  
30  
31  
32  
33  
34  
35

### 36 ***Rural disparities***

37 As reported in Panel A of Table 4, the density of hospital beds in rural areas of China  
38 has a strong positive association with the satisfaction of respondents (OR=1.26,  
39 p=0.002), whereas the odds ratio is only 1.04 (p=0.057) in the baseline model. This  
40 phenomenon may be explained as follows. First, hospitalization is often perceived in  
41 China as health care of better quality and with more experienced physicians. Second,  
42 hospitalization is often preferred by many patients in China because inpatient service  
43 has a higher reimbursement ratio than outpatient service[17, 26]. Third, in rural areas  
44 of China, hospitalization can be especially helpful assuring a patient with having  
45 access to quality medical care and alleviating the commuting needs from distantly  
46 located home places[41]. Additionally, if admitted to hospitalization, most rural  
47 residents have a lower opportunity cost in terms of time than urban residents, since  
48 they don't have an office-commuting requirement.  
49  
50  
51  
52  
53  
54  
55  
56  
57

58 While the bed occupancy rate of tertiary hospitals in China could be as high as 107.5%  
59 on average due to temporarily added beds, it may be as low as 58.0% in  
60



1  
2  
3 township-level hospitals [46]. It is often difficult to get admitted into tertiary hospitals,  
4 or for shorter lengths of stay[16]. When there is a higher density of hospital beds in  
5 rural areas, it may be easier for a patient to get admitted for hospitalization[47-49].  
6  
7 Therefore, rural residents with easy hospitalization admission may perceive having  
8 good quality healthcare with a low cost. Consequently, they may report having a high  
9 level of satisfaction.

10  
11 As shown in Panel B of Table 4, the odds ratio of Rural\*2015 is as large as 1.57  
12 (p<0.001). This finding indicates a large and significant enhancement in the  
13 satisfaction with the healthcare system in rural areas. After controlling the changes in  
14 2015, the odds ratio of the rural area becomes insignificant, while the year dummy of  
15 2015 is still large and highly significant (OR=1.24, p<0.001). Together, these results  
16 suggest that the healthcare reform actions of China from 2013 to 2015 have brought  
17 significant improvements to the healthcare satisfaction in rural areas.  
18  
19

### 20 21 22 ***Regional variations and changes in 2015***

23  
24 The regional differences in the healthcare system satisfaction may have reflected the  
25 inequality of healthcare resources and quality in China[50]. Beijing, Shanghai, Tianjin,  
26 and Chongqing City, the four municipalities, are the most important central cities in  
27 China with the most advanced and abundant healthcare resources in China. Since they  
28 have also piloted many healthcare reform plans, it is not unexpected that there are no  
29 significant changes in public satisfaction with the healthcare system during the  
30 studied period.

31  
32 South and West regions, are more likely to experience a significant and large  
33 enhancement in healthcare satisfaction during the reform period of 2013-2015,  
34 because many of the reform policies were eventually implemented in these regions  
35 after piloting in the East region of China.

36  
37 Shanghai's lower level of satisfaction may be due to the very crowded hospital  
38 environment and overstretched resources. As the most modernized city in China,  
39 Shanghai has the most skilled professionals and advanced medical equipment.  
40 However, due to the lack of a referral system, all tertiary hospitals in Shanghai are  
41 always in high demand and crowded with patients from all over the country[16].  
42 Hence, local Shanghai residents actually don't have a good experience generally. This  
43 situation has not improved during this round of healthcare reform.

44  
45 It is noted that the Northeast Region consistently reported a lower level of satisfaction

1  
2  
3 and no significant improvements during the studied period. The low satisfaction  
4 actually can be attributed to the weak economy concurrently in this region. Known as  
5 China's rustbelt, the three northeastern provinces were plagued by widespread layoffs  
6 in the 1990s and were among the regions with the weakest economic growth in  
7 2010s[51]. With a shrinking economy and fiscal deficits, the local governments had  
8 very limited resources available for healthcare and many local healthcare  
9 professionals migrated to other developed regions in the country[9, 52]. Additionally,  
10 poor economic performance may also directly affect the respondents' perception and  
11 lead to a lower rating of the public policies, including the healthcare system[4, 5].  
12 Additionally, Chen et al. (2019) report that patients in the Northeast consistently had  
13 the highest mortalities in terms of the overall stroke and each subtype of stroke[53].  
14 The researchers indicate that this may be mainly due to the differences in lifestyle and  
15 inconsistent medical development and a lower economic level.  
16  
17  
18  
19  
20  
21  
22  
23  
24  
25  
26  
27

### 28 ***Robustness check***

29 As a robustness check, "being satisfied" is redefined as scoring equal to or greater  
30 than 80 points. About 15% of the sample population scored their satisfaction equal to  
31 or greater than 80 points. Logistic regressions of the same model were performed  
32 accordingly.  
33  
34

35 Ordinary Least Square (OLS) regressions were also performed, using the original  
36 'satisfaction score' of respondents as the dependent variable.  
37  
38

39 The results of the robustness checks above are all consistent with our current findings.  
40  
41  
42

### 43 **LIMITATIONS**

44 As a type of subjective evaluation, public satisfaction has several weaknesses when  
45 being adopted to measure the healthcare system's performance. First, the data in this  
46 study, especially, the CGSS 2013, contains only one global satisfaction score.  
47 Therefore, it is difficult to attribute the satisfaction or dissatisfaction to specific  
48 reform actions or issues of the healthcare system[5]. With the advancement in  
49 research and reform of the healthcare system in China, a dataset with more detailed  
50 information may be available in more recent or future years. Grey Relational Analysis  
51 method, as a novel quantitative method, can also be applied to obtain more detailed  
52 results to better understand the fuzzy/grey concept of satisfaction with the health  
53 system [54-56].  
54  
55  
56  
57  
58  
59  
60

1  
2  
3 Second, while being related to the quality and outcome of healthcare service, public  
4 satisfaction may also be influenced by some external factors, such as media and  
5 political discussion [5, 36], or the citizens' expectations[54-57]. Since these  
6 confounding factors are not included in the original survey data and it is almost  
7 impossible to identify or recover them from other resources, the possibility of  
8 potential bias cannot be completely ruled out. While it will be interesting to study  
9 how media reports and portrayals about physicians and hospitals may influence the  
10 public's perception or satisfaction with the healthcare system in China, this topic  
11 actually is beyond our research scope and expertise. Third, self-reported health status  
12 is used as a health measurement in this study. It is generally valid, however, not as  
13 ideal as clinical health measurements.  
14  
15  
16  
17  
18  
19  
20  
21  
22  
23

## 24 **CONCLUSION**

25 Using a total sample of 15,969 observations from Chinese national representative  
26 surveys, the CGSS 2013 and 2015, this study examined various factors associated  
27 with public satisfaction of the healthcare system in China, such as demographic and  
28 individual socioeconomic characteristics, rural areas and regions across the country,  
29 as well as the changes of public satisfaction in 2015.  
30  
31  
32  
33

34 While there was a nation-wide general improvement in the satisfaction level recorded  
35 in year 2015, when the 2nd phase of the 2009 Health Reform was implemented, the  
36 low level of satisfaction among internal migrants as well as those of residents in the  
37 Northeast region of China remained unchanged. Especially, close attention and further  
38 study about the causal reason for the low level of satisfaction in the Northeast region  
39 is recommended.  
40  
41  
42  
43  
44  
45

## 46 **Ethical Statement**

47 The data used in this study is obtained from a publicly available national database.  
48  
49  
50

## 51 **Funding statement**

52 This work was supported by the Macao Higher Education Fund, Specialized Subsidy  
53 Scheme for Macao Higher Education Institutions in the Area of Research in  
54 Humanities and Social Sciences. Grant No.: DSES-19-016b-MSB.  
55  
56  
57

58 LIU Chengkun acknowledges the financial support of Faculty Research Grant from  
59 Macau University of Science and Technology. Grant No.: FRG-19-049-TISD.  
60

**Competing interests statement**

No competing financial, professional, or personal interests that might have influenced the performance or presentation of the work described in this manuscript.

**Author contributions**

JHZ, XP, CKL designed the study and developed the methods. JHZ, XP, and HZ reviewed literature. JHZ, XP, YJC sorted and analyzed the data. XP prepared the tables. JHZ and XP drafted the manuscript. CKL, HZ and OOI provided a critical review of the manuscript. All authors have reviewed and approved the final version of the manuscript for publication.

For peer review only

## Reference

- 1 Mossialos E. Citizens' views on health care systems in the 15 member states of the European Union, *Health Econ* 1997;6:109-16.
- 2 Blendon RJ, Kim M, Benson JM. The public versus the World Health Organization on health system performance, *Health Aff* 2001;20:10-20.
- 3 Papanicolas I, Cylus J, Smith PC. An analysis of survey data from eleven countries finds that 'satisfaction' with health system performance means many things, *Health Aff* 2013;32:734-42.
- 4 AlSaud AM, Taddese HB, Filippidis FT. Trends and correlates of the public's perception of healthcare systems in the European Union: a multilevel analysis of Eurobarometer survey data from 2009 to 2013, *BMJ Open* 2018;8:e018178,2017-018178.
- 5 Footman K, Roberts B, Mills A, et al. Public satisfaction as a measure of health system performance: a study of nine countries in the former Soviet Union, *Health Policy* 2013;112:62-9.
- 6 Hero JO, Blendon RJ, Zaslavsky AM, et al. Understanding what makes Americans dissatisfied with their health care system: an international comparison, *Health Aff* 2016;35:502-9.
- 7 Grosso AL, Van Ryzin GG. Public management reform and citizen perceptions of the UK health system, *International Review of Administrative Sciences* 2012;78:494-513.
- 8 Eggleston K. Health care for 1.3 billion: An overview of China's health system, 2012.
- 9 Liu GG, Vortherms SA, Hong X. China's health reform update, *Annu Rev Public Health* 2017;38:431-48.
- 10 Zhao D, Zhao H, Cleary PD. Understanding the determinants of public trust in the health care system in China: an analysis of a cross-sectional survey, *J Health Serv Res Policy* 2019;24:37-43.
- 11 Fan JB. Research on the perception structure of residents' satisfaction with public health service, *East China normal university (philosophy and social science edition)* 2018;50:163-171.

1  
2  
3 12 Wang, Z; Zhou, L; Peng, F. Fiscal expenditure, scale comparison and public  
4 service satisfaction: an analysis based on county-level medical data, *Chinese*  
5 *administration* 2018:14.  
6  
7

8 13 Cheng L. Influencing Factors of Health Service Satisfaction of Urban and Rural  
9 Residents -- An Empirical Analysis Based on 604 Questionnaires in Anhui Province,  
10 *Journal of Yichun University* 2014;36:34-37.  
11  
12

13 14 Tang J. Farmers' satisfaction with rural medical and health services and its  
14 influencing factors -- based on questionnaire survey data of 375 farmers, *Journal of*  
15 *hunan agricultural university: social science edition* 2016;17:2-48.  
16  
17

18 15 Shan L, Zhao M, Ning N, et al. Dissatisfaction with current integration reforms of  
19 health insurance schemes in China: are they a success and what matters? *Health*  
20 *Policy Plan* 2018;33:345-54.  
21  
22

23 16 Zhang JH, Yuan J, Wang T. Direct cost of dengue hospitalization in Zhongshan,  
24 China: Associations with demographics, virus types and hospital accreditation, *PLoS*  
25 *neglected tropical diseases* 2017;11:e0005784.  
26  
27

28 17 Yinzi Jin, Hou Z, Zhang D. Determinants of Health Insurance Coverage among  
29 People Aged 45 and over in China: Who Buys Public, Private and Multiple Insurance,  
30 *PLoS One* 2016;11:e0161774.  
31  
32

33 18 Brixi H, Mu Y, Targa B, et al. Engaging sub-national governments in addressing  
34 health equities: challenges and opportunities in China's health system reform, *Health*  
35 *Policy Plan* 2012;28:809-24.  
36  
37

38 19 Ramesh M, Wu X, He AJ. Health governance and healthcare reforms in China,  
39 *Health Policy Plan* 2013;29:663-72.  
40  
41

42 20 Zhang L, Liu N. Health reform and out-of-pocket payments: lessons from China,  
43 *Health Policy Plan* 2013;29:217-26.  
44  
45

46 21 Penm J, Li Y, Zhai S, et al. The impact of clinical pharmacy services in China on  
47 the quality use of medicines: a systematic review in context of China's current  
48 healthcare reform, *Health Policy Plan* 2013;29:849-72.  
49  
50

51 22 Wu D, Lam TP, Lam KF, et al. Challenges to healthcare reform in China:  
52 profit-oriented medical practices, patients' choice of care and guanxi culture in  
53 Zhejiang province, *Health Policy Plan* 2017;32:1241-7.  
54  
55

56 23 Li L, Fu H. China's health care system reform: Progress and prospects, *Int J Health*  
57 *Plann Manage* 2017;32:240-53.  
58  
59  
60

- 1  
2  
3 24 Eggleston K, Ling L, Qingyue M, et al. Health service delivery in China: a  
4 literature review, *Health Econ* 2008;17:149-65.  
5  
6  
7 25 Liu J, Zhang Y. Health status and health disparity in China: a demographic and  
8 socioeconomic perspective, *China Population and Development Studies*  
9 2019;2:301-22.  
10  
11  
12 26 Li X, Lu J, Hu S, et al. The primary health-care system in China, *The Lancet*  
13 2017;390:2584-94.  
14  
15  
16 27 Munro N, Duckett J. Explaining public satisfaction with health-care systems:  
17 findings from a nationwide survey in China, *Health Expectations* 2016;19:654-66.  
18  
19  
20 28 Yu H. Universal health insurance coverage for 1.3 billion people: what accounts  
21 for China's success? *Health Policy* 2015;119:1145-52.  
22  
23  
24 29 Hesketh T, Wu D, Mao L, et al. Violence against doctors in China, *BMJ*  
25 2012;345:e5730.  
26  
27  
28 30 Wang X, Wang X, Zheng J. How to end violence against doctors in China, *The*  
29 *Lancet* 2012;380:647-8.  
30  
31  
32 31 Shi L, Zhang D, Zhou C, et al. A cross-sectional study on the prevalence and  
33 associated risk factors for workplace violence against Chinese nurses, *BMJ Open*  
34 2017;7:e013105,2016-013105.  
35  
36  
37 32 Burns LR, Liu GG. China's Healthcare System and Reform: Cambridge University  
38 Press 2017.  
39  
40  
41 33 Jiao WP. Diagnosis-Related Groups' Payment Reform in Beijing, *Chin Med J*  
42 *(Engl)* 2018;131:1763-4.  
43  
44  
45 34 Xesfingi S, Vozikis A. Patient satisfaction with the healthcare system: Assessing  
46 the impact of socio-economic and healthcare provision factors, *BMC health services*  
47 *research* 2016;16:94.  
48  
49  
50 35 Stokes J, Gurol-Urganci I, Hone T, et al. Effect of health system reforms in Turkey  
51 on user satisfaction, *J Glob Health* 2015;5:020403.  
52  
53  
54 36 Bleich SN, Özaltın E, Murray CJ. How does satisfaction with the health-care  
55 system relate to patient experience? *Bull World Health Organ* 2009;87:271-8.  
56  
57  
58 37 Vuong Q, Vuong T, Ho T, et al. Psychological and socio-economic factors  
59 affecting social sustainability through impacts on perceived health care quality and  
60 public health: The case of Vietnam, *Sustainability* 2017;9:1456.

- 1  
2  
3 38 Lee S, Suh NK, Song J. Determinants of public satisfaction with the National  
4 Health Insurance in South Korea, *Int J Health Plann Manage* 2009;24:131-46.  
5  
6  
7 39 Dong W, Zhang Q, Yan C, et al. Residents' satisfaction with primary medical and  
8 health services in Western China, *BMC health services research* 2017;17:298.  
9  
10  
11 40 He AJ. Public satisfaction with the health system and popular support for state  
12 involvement in an East Asian welfare regime: health policy legitimacy of Hong Kong,  
13 *Social Policy & Administration* 2018;52:750-70.  
14  
15  
16 41 Liu Y, Yuan Z, Liu Y, et al. Changing community health service delivery in  
17 economically less-developed rural areas in China: impact on service use and  
18 satisfaction, *BMJ Open* 2014;4:e004148,2013-004148.  
19  
20  
21 42 Kohl J, Wendt C. Satisfaction with health care systems. In: Anonymous .  
22 Challenges for quality of life in the contemporary world: Springer 2004:311-31.  
23  
24  
25 43 Missinne S, Meuleman B, Bracke P. The popular legitimacy of European  
26 healthcare systems: a multilevel analysis of 24 countries, *Journal of European Social*  
27 *Policy* 2013;23:231-47.  
28  
29  
30 44 Hockenberry JM, Becker ER. How do hospital nurse staffing strategies affect  
31 patient satisfaction? *ILR Review* 2016;69:890-910.  
32  
33  
34 45 Kringos DS, Boerma W, van der Zee J, et al. Europe's strong primary care systems  
35 are linked to better population health but also to higher health spending, *Health Aff*  
36 2013;32:686-94.  
37  
38  
39 46 Liu YF, Wang S, Qiao HM. Correlation analysis between the average length of  
40 stay of discharged patients and the utilization rate of hospital beds, *China Health*  
41 *Care&Nutrition* 2012;9:4205-6.  
42  
43  
44 47 Folland S, Goodman AC, Stano M. The economics of health and health care:  
45 Taylor & Francis 2017.  
46  
47  
48 48 Wennberg JE, Barnes BA, Zubkoff M. Professional uncertainty and the problem of  
49 supplier-induced demand, *Soc Sci Med* 1982;16:811-24.  
50  
51  
52 49 Watts BV, Shiner B, Klauss G, et al. Supplier-induced demand for psychiatric  
53 admissions in Northern New England, *BMC Psychiatry* 2011;11:146.  
54  
55  
56 50 Meng Q, Fang H, Liu X, et al. Consolidating the social health insurance schemes  
57 in China: towards an equitable and efficient health system, *The Lancet*  
58 2015;386:1484-92.  
59  
60



1  
2  
3 51 Li XP. Is the economic decline in northeast China really the fault of the system?  
4 *Resource Recycling* 2016;7:74-77.  
5

6  
7 52 Zhang S, Zhang W, Zhou H, et al. How China's new health reform influences  
8 village doctors' income structure: evidence from a qualitative study in six counties in  
9 China, *Human resources for health* 2015;13:26.  
10

11  
12 53 Chen H, Shi L, Wang N, et al. Analysis on geographic variations in hospital deaths  
13 and endovascular therapy in ischaemic stroke patients: an observational  
14 cross-sectional study in China, *BMJ Open* 2019;9:e029079,2019-029079.  
15

16  
17 54 Javed SA, Liu S, Mahmoudi A, et al. Patients' satisfaction and public and private  
18 sectors' health care service quality in Pakistan: Application of grey decision analysis  
19 approaches, *Int J Health Plann Manage* 2019;34:e168-82.  
20

21  
22 55 Javed SA, Liu S. Evaluation of outpatient satisfaction and service quality of  
23 Pakistani healthcare projects: Application of a novel synthetic Grey Incidence  
24 Analysis model, *Grey Systems: Theory and Application* 2018.  
25

26  
27 56 Javed SA, Ilyas F. Service quality and satisfaction in healthcare sector of  
28 Pakistan—the patients' expectations, *Int J Health Care Qual Assur* 2018.  
29

30  
31 57 Tavares AI, Ferreira PL. Public satisfaction with health system coverage, empirical  
32 evidence from SHARE data, *International Journal of Health Economics and*  
33 *Management* 2020:1-21.  
34  
35  
36  
37  
38  
39  
40  
41  
42  
43  
44  
45  
46  
47  
48  
49  
50  
51  
52  
53  
54  
55  
56  
57  
58  
59  
60

1  
2  
3  
4  
5  
6  
7  
8  
9  
10  
11  
12  
13  
14  
15  
16  
17  
18  
19  
20  
21  
22  
23  
24  
25  
26  
27  
28  
29  
30  
31  
32  
33  
34  
35  
36  
37  
38  
39  
40  
41  
42  
43  
44  
45  
46  
47  
48  
49  
50  
51  
52  
53  
54  
55  
56  
57  
58  
59  
60

**Appendix**

**Table 1 Descriptive statistics of the respondents in CGSS 2013-2015**

Panel A: Respondents

|                                                | Total  | 2013   | 2015   | Chi2  |
|------------------------------------------------|--------|--------|--------|-------|
| N                                              | 15969* | 5566   | 10403  | /     |
| <b>Satisfaction</b>                            | 68.50  | 66.21  | 69.73  | /     |
| <b>Being satisfied</b>                         | 60.08% | 52.91% | 63.93% | /     |
| <b>Age</b>                                     |        |        |        |       |
| Age(average years)                             | 51.9   | 50.8   | 52.5   | /     |
| Age<60                                         | 63.4%  | 66.4%  | 61.8%  | 32.34 |
| Age>=60                                        | 36.6%  | 33.6%  | 38.2%  |       |
| <b>Gender</b>                                  |        |        |        |       |
| Male                                           | 50.6%  | 50.8%  | 50.5%  | 0.07  |
| Female                                         | 49.4%  | 49.2%  | 49.5%  |       |
| <b>Ethnic group</b>                            |        |        |        |       |
| Han                                            | 92.8%  | 92.4%  | 93.1%  | 2.30  |
| Ethnic minority                                | 7.2%   | 7.6%   | 7.0%   |       |
| <b>Marital status</b>                          |        |        |        |       |
| Single/separated/widow/widower                 | 29.3%  | 28.8%  | 29.6%  | 1.10  |
| Cohabitation& Married                          | 70.7%  | 71.2%  | 70.4%  |       |
| <b>Employment status</b>                       |        |        |        |       |
| Not working                                    | 43.1%  | 39.8%  | 44.9%  | 38.86 |
| Employed/Farm                                  | 56.9%  | 60.3%  | 55.1%  |       |
| <b>Education</b>                               |        |        |        |       |
| Elementary School or less                      | 37.8%  | 36.2%  | 38.7%  | 10.71 |
| Middle / high School                           | 45.6%  | 47.0%  | 44.9%  |       |
| College                                        | 15.5%  | 15.8%  | 15.3%  |       |
| Postgraduate                                   | 1.1%   | 1.1%   | 1.1%   |       |
| <b>Self-reported health</b>                    |        |        |        |       |
| Very bad                                       | 3.3%   | 3.4%   | 3.3%   | 49.54 |
| Bad                                            | 15.3%  | 14.4%  | 15.8%  |       |
| Average                                        | 21.6%  | 19.8%  | 22.6%  |       |
| Good                                           | 38.0%  | 37.7%  | 38.1%  |       |
| Very good                                      | 21.8%  | 24.7%  | 20.3%  |       |
| <b>Self-reported household economic status</b> |        |        |        |       |
| Far below average                              | 6.0%   | 5.7%   | 6.2%   | 37.26 |
| Below average                                  | 32.2%  | 30.2%  | 33.3%  |       |
| Average                                        | 53.7%  | 57.0%  | 52.0%  |       |
| Above average                                  | 8.1%   | 7.3%   | 8.2%   |       |
| <b>Insurance status</b>                        |        |        |        |       |
| Without any health Insurance                   | 10.2%  | 11.3%  | 9.6%   | 10.90 |
| With any health insurance                      | 89.8%  | 88.7%  | 90.4%  |       |
| <b>Residence status</b>                        |        |        |        |       |
| Urban                                          | 60.0%  | 59.7%  | 60.2%  | 0.28  |

|    |                                  |       |       |       |       |
|----|----------------------------------|-------|-------|-------|-------|
| 1  |                                  |       |       |       |       |
| 2  |                                  |       |       |       |       |
| 3  | Rural                            | 40.0% | 40.3% | 39.8% |       |
| 4  | <b>Internal migrant</b>          |       |       |       |       |
| 5  |                                  |       |       |       |       |
| 6  | No                               | 89.0% | 88.7% | 89.2% | 1.09  |
| 7  | Yes                              | 11.0% | 11.3% | 10.8% |       |
| 8  |                                  |       |       |       |       |
| 9  | <b>Regions or municipalities</b> |       |       |       |       |
| 10 | East china (without Shanghai)    | 23.2% | 23.6% | 23.1% |       |
| 11 | Middle china                     | 23.9% | 22.2% | 24.8% |       |
| 12 | West china (without Chongqin)    | 21.7% | 21.1% | 22.0% |       |
| 13 | NEast china                      | 14.2% | 14.9% | 13.8% | 37.28 |
| 14 | Beijing                          | 5.1%  | 4.7%  | 5.3%  |       |
| 15 | Shanghai                         | 6.2%  | 7.0%  | 5.7%  |       |
| 16 | Tianjin                          | 3.2%  | 3.7%  | 3.0%  |       |
| 17 | Chongqin                         | 2.6%  | 3.0%  | 2.4%  |       |
| 18 |                                  |       |       |       |       |
| 19 |                                  |       |       |       |       |
| 20 |                                  |       |       |       |       |

**Note:** the total observation number is sample-weighted adjusted.

peer review only

Panel B ( 1/2 )

|                                   | % of healthcare expenditure in GDP |           |                     | Government % in healthcare expenditure |       |                     | Out of pocket (%) |           |                     |
|-----------------------------------|------------------------------------|-----------|---------------------|----------------------------------------|-------|---------------------|-------------------|-----------|---------------------|
|                                   | Mean                               | Std. Err. | [95% Conf.Interval] | Mean                                   | SE    | [95% Conf.Interval] | Mean              | Std. Err. | [95% Conf.Interval] |
| Total                             | 5.48                               | 0.005     | ( 5.47 - 5.49 )     | 29.45                                  | 0.029 | ( 29.40 - 29.51 )   | 33.12             | 0.031     | ( 33.06 - 33.19 )   |
| East china<br>( without Shanghai) | 4.24                               | 0.006     | ( 4.23 - 4.26 )     | 25.83                                  | 0.034 | ( 25.77 - 25.90 )   | 31.89             | 0.041     | ( 31.81 - 31.97 )   |
| Middle china                      | 5.45                               | 0.005     | ( 5.44 - 5.46 )     | 32.84                                  | 0.040 | ( 32.77 - 32.92 )   | 36.87             | 0.044     | ( 36.78 - 36.96 )   |
| West china<br>( without Chongqin) | 6.57                               | 0.008     | ( 6.55 - 6.59 )     | 36.54                                  | 0.062 | ( 36.42 - 36.67 )   | 32.13             | 0.040     | ( 32.05 - 32.20 )   |
| NEast china                       | 5.53                               | 0.011     | ( 5.51 - 5.55 )     | 24.51                                  | 0.026 | ( 24.46 - 24.56 )   | 40.41             | 0.054     | ( 40.30 - 40.51 )   |
| Beijing                           | 7.21                               | 0.015     | ( 7.19 - 7.24 )     | 25.43                                  | 0.040 | ( 25.35 - 25.51 )   | 20.45             | 0.058     | ( 20.34 - 20.56 )   |
| Shanghai                          | 5.59                               | 0.006     | ( 5.58 - 5.60 )     | 20.79                                  | 0.017 | ( 20.76 - 20.83 )   | 20.22             | 0.024     | ( 20.17 - 20.27 )   |
| Tianjin                           | 3.97                               | 0.010     | ( 3.95 - 3.99 )     | 25.86                                  | 0.027 | ( 25.81 - 25.91 )   | 34.20             | 0.089     | ( 34.03 - 34.37 )   |
| Chongqin                          | 5.64                               | 0.009     | ( 5.62 - 5.65 )     | 31.23                                  | 0.013 | ( 31.20 - 31.26 )   | 32.22             | 0.164     | ( 31.90 - 32.54 )   |

(To be continued on next page. )

Panel B ( 2/2 )

|                                   | hospital beds/1k population |              |                     | healthcare workforce/1k population |              |                     |
|-----------------------------------|-----------------------------|--------------|---------------------|------------------------------------|--------------|---------------------|
|                                   | Mean                        | Std.<br>Err. | [95% Conf.Interval] | Mean                               | Std.<br>Err. | [95% Conf.Interval] |
| Total                             | 6.05                        | 0.019        | ( 6.01 - 6.08 )     | 2.84                               | 0.008        | ( 2.82 - 2.85 )     |
| East china ( without<br>Shanghai) | 5.96                        | 0.035        | ( 5.90 - 6.03 )     | 2.97                               | 0.017        | ( 2.94 - 3.01 )     |
| Middle china                      | 5.82                        | 0.038        | ( 5.75 - 5.89 )     | 2.36                               | 0.015        | ( 2.33 - 2.39 )     |
| West china (without<br>Chongqin)  | 5.87                        | 0.043        | ( 5.79 - 5.96 )     | 2.38                               | 0.018        | ( 2.34 - 2.41 )     |
| NEast china                       | 6.44                        | 0.056        | ( 6.33 - 6.55 )     | 2.67                               | 0.019        | ( 2.63 - 2.70 )     |
| Beijing                           | 7.48                        | 0.065        | ( 7.36 - 7.61 )     | 5.60                               | 0.034        | ( 5.53 - 5.66 )     |
| Shanghai                          | 6.89                        | 0.077        | ( 6.74 - 7.04 )     | 4.27                               | 0.003        | ( 4.26 - 4.27 )     |
| Tianjin                           | 5.36                        | 0.064        | ( 5.23 - 5.48 )     | 3.15                               | 0.015        | ( 3.12 - 3.18 )     |
| Chongqin                          | 4.26                        | 0.026        | ( 4.21 - 4.31 )     | 1.58                               | 0.012        | ( 1.55 - 1.60 )     |

**Table 2 Descriptive Statistics of satisfaction about the health system in China (2013-2015)**  
**Panel A (1/2)**

|                                                | Satisfaction score |           |                     |
|------------------------------------------------|--------------------|-----------|---------------------|
|                                                | Mean               | Std. Err. | [95% Conf.Interval] |
| <b>total</b>                                   |                    |           |                     |
| <b>Satisfaction score</b>                      | 68.50              | 0.15      | ( 68.20 - 68.80 )   |
| <b>Age</b>                                     |                    |           |                     |
| Age<60                                         | 67.43              | 0.19      | ( 67.06 - 67.80 )   |
| Age>=60                                        | 70.35              | 0.27      | ( 69.83 - 70.88 )   |
| <b>Gender</b>                                  |                    |           |                     |
| Male                                           | 68.16              | 0.23      | ( 67.72 - 68.61 )   |
| Female                                         | 68.84              | 0.21      | ( 68.42 - 69.26 )   |
| <b>Ethnic group</b>                            |                    |           |                     |
| Han                                            | 68.28              | 0.16      | ( 67.97 - 68.60 )   |
| Ethnic minority                                | 71.26              | 0.55      | ( 70.19 - 72.34 )   |
| <b>Marital status</b>                          |                    |           |                     |
| Single/separated/widow/widower                 | 68.07              | 0.34      | ( 67.40 - 68.74 )   |
| Cohabitation& Married                          | 68.67              | 0.17      | ( 68.34 - 69.00 )   |
| <b>Employment status</b>                       |                    |           |                     |
| Not working                                    | 69.08              | 0.25      | ( 68.60 - 69.56 )   |
| Employed/Farm                                  | 68.06              | 0.20      | ( 67.66 - 68.45 )   |
| <b>Education</b>                               |                    |           |                     |
| Elementary School or less                      | 70.76              | 0.26      | ( 70.26 - 71.26 )   |
| Middle / high School                           | 67.53              | 0.23      | ( 67.08 - 67.99 )   |
| College                                        | 66.36              | 0.37      | ( 65.64 - 67.09 )   |
| Postgraduate                                   | 60.69              | 1.58      | ( 57.59 - 63.78 )   |
| <b>Self-reported health</b>                    |                    |           |                     |
| Very bad                                       | 66.39              | 1.14      | ( 64.15 - 68.63 )   |
| Bad                                            | 68.28              | 0.43      | ( 67.43 - 69.13 )   |
| Average                                        | 68.18              | 0.34      | ( 67.52 - 68.85 )   |
| Good                                           | 68.62              | 0.24      | ( 68.15 - 69.10 )   |
| Very good                                      | 69.07              | 0.32      | ( 68.43 - 69.70 )   |
| <b>Self-reported household economic status</b> |                    |           |                     |
| Far below average                              | 65.26              | 0.86      | ( 63.57 - 66.95 )   |
| Below average                                  | 67.16              | 0.29      | ( 66.59 - 67.73 )   |
| Average                                        | 69.37              | 0.20      | ( 68.99 - 69.76 )   |
| Above average                                  | 70.44              | 0.52      | ( 69.42 - 71.46 )   |
| <b>Insurance status</b>                        |                    |           |                     |
| Without any health Insurance                   | 65.90              | 0.53      | ( 64.85 - 66.94 )   |
| With any health insurance                      | 68.79              | 0.16      | ( 68.48 - 69.11 )   |
| <b>Residence status</b>                        |                    |           |                     |
| Urban                                          | 67.48              | 0.20      | ( 67.08 - 67.87 )   |
| Rural                                          | 70.03              | 0.24      | ( 69.56 - 70.51 )   |
| <b>Internal migrant</b>                        |                    |           |                     |
| No                                             | 68.99              | 0.16      | ( 68.67 - 69.31 )   |
| Yes                                            | 64.50              | 0.50      | ( 63.53 - 65.48 )   |
| <b>Regions or municipalities</b>               |                    |           |                     |
| East china ( without Shanghai)                 | 68.32              | 0.30      | ( 67.74 - 68.91 )   |

|                               |       |      |                   |
|-------------------------------|-------|------|-------------------|
| Middle china                  | 70.53 | 0.28 | ( 69.98 - 71.08 ) |
| West china (without Chongqin) | 70.49 | 0.33 | ( 69.86 - 71.13 ) |
| NEast china                   | 63.88 | 0.48 | ( 62.94 - 64.82 ) |
| Beijing                       | 66.10 | 0.77 | ( 64.58 - 67.62 ) |
| Shanghai                      | 64.33 | 0.72 | ( 62.91 - 65.75 ) |
| Tianjin                       | 68.84 | 0.78 | ( 67.31 - 70.36 ) |
| Chongqin                      | 73.94 | 0.75 | ( 72.46 - 75.41 ) |

( To be continued )

For peer review only

1  
2  
3  
4  
5  
6  
7  
8  
9  
10  
11  
12  
13  
14  
15  
16  
17  
18  
19  
20  
21  
22  
23  
24  
25  
26  
27  
28  
29  
30  
31  
32  
33  
34  
35  
36  
37  
38  
39  
40  
41  
42  
43  
44  
45  
46

**Panel A (2/2)**

| <b>Satisfaction score</b>      |       |           |                     |       |           |                     |
|--------------------------------|-------|-----------|---------------------|-------|-----------|---------------------|
|                                | 2013  |           |                     | 2015  |           |                     |
|                                | Mean  | Std. Err. | [95% Conf.Interval] | Mean  | Std. Err. | [95% Conf.Interval] |
| <b>Satisfaction</b>            | 66.21 | 0.24      | ( 65.73 - 66.68 )   | 69.73 | 0.20      | ( 69.34 - 70.12 )   |
| <b>Age</b>                     |       |           |                     |       |           |                     |
| Age<60                         | 65.40 | 0.29      | ( 64.82 - 65.97 )   | 68.60 | 0.25      | ( 68.11 - 69.08 )   |
| Age>=60                        | 67.81 | 0.45      | ( 66.93 - 68.68 )   | 71.56 | 0.33      | ( 70.91 - 72.21 )   |
| <b>Gender</b>                  |       |           |                     |       |           |                     |
| Male                           | 66.07 | 0.35      | ( 65.38 - 66.76 )   | 69.29 | 0.29      | ( 68.72 - 69.86 )   |
| Female                         | 66.35 | 0.34      | ( 65.67 - 67.02 )   | 70.17 | 0.27      | ( 69.64 - 70.71 )   |
| <b>Ethnic group</b>            |       |           |                     |       |           |                     |
| Han                            | 65.94 | 0.25      | ( 65.44 - 66.44 )   | 69.53 | 0.21      | ( 69.13 - 69.94 )   |
| Ethnic minority                | 69.42 | 0.89      | ( 67.69 - 71.16 )   | 72.35 | 0.70      | ( 70.97 - 73.72 )   |
| <b>Marital status</b>          |       |           |                     |       |           |                     |
| Single/separated/widow/widower | 65.73 | 0.54      | ( 64.68 - 66.79 )   | 69.30 | 0.44      | ( 68.44 - 70.15 )   |
| Cohabitation& Married          | 66.40 | 0.27      | ( 65.87 - 66.92 )   | 69.91 | 0.22      | ( 69.49 - 70.34 )   |
| <b>Employment status</b>       |       |           |                     |       |           |                     |
| Not working                    | 66.38 | 0.41      | ( 65.58 - 67.18 )   | 70.37 | 0.31      | ( 69.77 - 70.97 )   |
| Employed/Farm                  | 66.09 | 0.31      | ( 65.49 - 66.69 )   | 69.21 | 0.26      | ( 68.69 - 69.72 )   |
| <b>Education</b>               |       |           |                     |       |           |                     |
| Elementary School or less      | 68.15 | 0.40      | ( 67.36 - 68.94 )   | 72.07 | 0.33      | ( 71.42 - 72.71 )   |
| Middle / high School           | 65.50 | 0.36      | ( 64.80 - 66.20 )   | 68.68 | 0.30      | ( 68.09 - 69.27 )   |
| College                        | 64.32 | 0.61      | ( 63.12 - 65.52 )   | 67.50 | 0.46      | ( 66.60 - 68.39 )   |
| Postgraduate                   | 59.17 | 2.54      | ( 54.19 - 64.15 )   | 61.45 | 1.99      | ( 57.55 - 65.35 )   |
| <b>Self-reported health</b>    |       |           |                     |       |           |                     |
| Very bad                       | 65.68 | 1.76      | ( 62.24 - 69.12 )   | 66.79 | 1.48      | ( 63.88 - 69.70 )   |
| Bad                            | 65.61 | 0.70      | ( 64.23 - 66.99 )   | 69.59 | 0.55      | ( 68.52 - 70.66 )   |



|    |                                  |       |      |                   |       |      |                   |
|----|----------------------------------|-------|------|-------------------|-------|------|-------------------|
| 1  |                                  |       |      |                   |       |      |                   |
| 2  |                                  |       |      |                   |       |      |                   |
| 3  |                                  |       |      |                   |       |      |                   |
| 4  |                                  |       |      |                   |       |      |                   |
| 5  | Average                          | 65.43 | 0.55 | ( 64.35 - 66.50 ) | 69.48 | 0.42 | ( 68.65 - 70.31 ) |
| 6  | Good                             | 66.31 | 0.38 | ( 65.58 - 67.05 ) | 69.85 | 0.31 | ( 69.25 - 70.46 ) |
| 7  | Very good                        | 67.09 | 0.50 | ( 66.11 - 68.06 ) | 70.36 | 0.42 | ( 69.53 - 71.19 ) |
| 8  | <b>Self-reported household</b>   |       |      |                   |       |      |                   |
| 9  | <b>economic status</b>           |       |      |                   |       |      |                   |
| 10 | Far below average                | 62.69 | 1.56 | ( 59.63 - 65.74 ) | 66.51 | 1.03 | ( 64.49 - 68.53 ) |
| 11 | Below average                    | 65.19 | 0.47 | ( 64.26 - 66.12 ) | 68.12 | 0.37 | ( 67.39 - 68.84 ) |
| 12 | Average                          | 66.88 | 0.30 | ( 66.30 - 67.46 ) | 70.84 | 0.26 | ( 70.34 - 71.34 ) |
| 13 | Above average                    | 67.87 | 0.86 | ( 66.18 - 69.56 ) | 71.61 | 0.64 | ( 70.35 - 72.87 ) |
| 14 |                                  |       |      |                   |       |      |                   |
| 15 | <b>Insurance status</b>          |       |      |                   |       |      |                   |
| 16 | Without any health insurance     | 64.36 | 0.77 | ( 62.86 - 65.87 ) | 66.86 | 0.72 | ( 65.45 - 68.27 ) |
| 17 | With any health insurance        | 66.44 | 0.26 | ( 65.93 - 66.95 ) | 70.04 | 0.21 | ( 69.63 - 70.44 ) |
| 18 |                                  |       |      |                   |       |      |                   |
| 19 | <b>Residence status</b>          |       |      |                   |       |      |                   |
| 20 | Urban                            | 67.12 | 0.31 | ( 66.52 - 67.72 ) | 67.67 | 0.26 | ( 67.15 - 68.18 ) |
| 21 | Rural                            | 64.85 | 0.40 | ( 64.06 - 65.64 ) | 72.85 | 0.30 | ( 72.26 - 73.43 ) |
| 22 |                                  |       |      |                   |       |      |                   |
| 23 | <b>Internal migrant</b>          |       |      |                   |       |      |                   |
| 24 | No                               | 66.52 | 0.26 | ( 66.01 - 67.02 ) | 70.31 | 0.21 | ( 69.91 - 70.72 ) |
| 25 | Yes                              | 63.76 | 0.77 | ( 62.26 - 65.27 ) | 64.92 | 0.65 | ( 63.65 - 66.19 ) |
| 26 |                                  |       |      |                   |       |      |                   |
| 27 | <b>Regions or municipalities</b> |       |      |                   |       |      |                   |
| 28 | East china ( without Shanghai)   | 67.26 | 0.49 | ( 66.29 - 68.23 ) | 68.91 | 0.38 | ( 68.16 - 69.66 ) |
| 29 | Middle china                     | 66.73 | 0.45 | ( 65.84 - 67.62 ) | 72.35 | 0.35 | ( 71.67 - 73.04 ) |
| 30 | West china (without Chongqin)    | 67.01 | 0.55 | ( 65.94 - 68.08 ) | 72.29 | 0.40 | ( 71.50 - 73.08 ) |
| 31 | NEast china                      | 62.88 | 0.69 | ( 61.53 - 64.23 ) | 64.46 | 0.65 | ( 63.20 - 65.73 ) |
| 32 | Beijing                          | 63.75 | 1.05 | ( 61.70 - 65.80 ) | 67.22 | 1.01 | ( 65.23 - 69.21 ) |
| 33 | Shanghai                         | 62.61 | 1.13 | ( 60.40 - 64.83 ) | 65.45 | 0.93 | ( 63.63 - 67.27 ) |
| 34 | Tianjin                          | 70.60 | 0.79 | ( 69.05 - 72.14 ) | 67.66 | 1.18 | ( 65.36 - 69.97 ) |
| 35 | Chongqin                         | 71.67 | 1.34 | ( 69.04 - 74.30 ) | 75.45 | 0.88 | ( 73.73 - 77.17 ) |
| 36 |                                  |       |      |                   |       |      |                   |
| 37 |                                  |       |      |                   |       |      |                   |
| 38 |                                  |       |      |                   |       |      |                   |
| 39 |                                  |       |      |                   |       |      |                   |
| 40 |                                  |       |      |                   |       |      |                   |
| 41 |                                  |       |      |                   |       |      |                   |
| 42 |                                  |       |      |                   |       |      |                   |
| 43 |                                  |       |      |                   |       |      |                   |
| 44 |                                  |       |      |                   |       |      |                   |
| 45 |                                  |       |      |                   |       |      |                   |
| 46 |                                  |       |      |                   |       |      |                   |

**Table 2 Descriptive Statistics of satisfaction about the health system in China (2013-2015)**  
**Panel B (1/2)**

|                                                | % of being satisfied (Full sample) |           |          |                |
|------------------------------------------------|------------------------------------|-----------|----------|----------------|
|                                                | Mean                               | Std. Err. | [95%     | Conf.Interval] |
| <b>Age</b>                                     |                                    |           |          |                |
| Age<60                                         | 57.58%                             | 0.54%     | ( 56.53% | - 58.63% )     |
| Age>=60                                        | 64.41%                             | 0.77%     | ( 62.91% | - 65.92% )     |
| <b>Gender</b>                                  |                                    |           |          |                |
| Male                                           | 59.56%                             | 0.64%     | ( 58.30% | - 60.81% )     |
| Female                                         | 60.61%                             | 0.61%     | ( 59.41% | - 61.82% )     |
| <b>Ethnic group</b>                            |                                    |           |          |                |
| Han                                            | 59.70%                             | 0.46%     | ( 58.80% | - 60.59% )     |
| Ethnic minority                                | 65.00%                             | 1.58%     | ( 61.90% | - 68.10% )     |
| <b>Marital status</b>                          |                                    |           |          |                |
| Single/separated/widow/widower                 | 60.02%                             | 0.97%     | ( 58.12% | - 61.91% )     |
| Cohabitation& Married                          | 60.10%                             | 0.48%     | ( 59.16% | - 61.05% )     |
| <b>Employment status</b>                       |                                    |           |          |                |
| Not working                                    | 61.26%                             | 0.69%     | ( 59.91% | - 62.61% )     |
| Employed/Farm                                  | 59.18%                             | 0.58%     | ( 58.05% | - 60.31% )     |
| <b>Education</b>                               |                                    |           |          |                |
| Elementary School or less                      | 65.71%                             | 0.71%     | ( 64.31% | - 67.11% )     |
| Middle / high School                           | 57.56%                             | 0.65%     | ( 56.28% | - 58.84% )     |
| College                                        | 54.58%                             | 1.15%     | ( 52.32% | - 56.84% )     |
| Postgraduate                                   | 47.99%                             | 4.63%     | ( 38.91% | - 57.06% )     |
| <b>Self-reported health</b>                    |                                    |           |          |                |
| Very bad                                       | 55.10%                             | 2.63%     | ( 49.94% | - 60.26% )     |
| Bad                                            | 58.02%                             | 1.19%     | ( 55.69% | - 60.35% )     |
| Average                                        | 58.19%                             | 0.98%     | ( 56.26% | - 60.11% )     |
| Good                                           | 61.59%                             | 0.70%     | ( 60.21% | - 62.97% )     |
| Very good                                      | 61.52%                             | 0.93%     | ( 59.70% | - 63.33% )     |
| <b>Self-reported household economic status</b> |                                    |           |          |                |
| Far below average                              | 53.21%                             | 2.02%     | ( 49.24% | - 57.18% )     |
| Below average                                  | 56.57%                             | 0.80%     | ( 54.99% | - 58.14% )     |
| Average                                        | 61.97%                             | 0.59%     | ( 60.81% | - 63.12% )     |
| Above average                                  | 66.66%                             | 1.47%     | ( 63.78% | - 69.54% )     |
| <b>Insurance status</b>                        |                                    |           |          |                |
| Without any health Insurance                   | 52.90%                             | 1.50%     | ( 49.97% | - 55.83% )     |
| With any health insurance                      | 60.90%                             | 0.46%     | ( 59.99% | - 61.80% )     |
| <b>Residence status</b>                        |                                    |           |          |                |
| Urban                                          | 57.67%                             | 0.57%     | ( 56.55% | - 58.79% )     |
| Rural                                          | 63.69%                             | 0.69%     | ( 62.35% | - 65.04% )     |
| <b>Internal migrant</b>                        |                                    |           |          |                |
| No                                             | 61.43%                             | 0.46%     | ( 60.53% | - 62.33% )     |
| Yes                                            | 49.10%                             | 1.47%     | ( 46.22% | - 51.98% )     |
| <b>Regions or municipalities</b>               |                                    |           |          |                |
| East china ( without Shanghai)                 | 58.66%                             | 0.91%     | ( 56.89% | - 60.44% )     |
| Middle china                                   | 66.38%                             | 0.84%     | ( 64.73% | - 68.03% )     |

|    |                               |        |       |                   |   |
|----|-------------------------------|--------|-------|-------------------|---|
| 1  |                               |        |       |                   |   |
| 2  |                               |        |       |                   |   |
| 3  | West china (without Chongqin) | 64.20% | 0.92% | ( 62.40% - 65.99% | ) |
| 4  | NEast china                   | 47.22% | 1.22% | ( 44.82% - 49.62% | ) |
| 5  | Beijing                       | 53.34% | 2.02% | ( 49.38% - 57.29% | ) |
| 6  | Shanghai                      | 52.52% | 2.04% | ( 48.53% - 56.52% | ) |
| 7  | Tianjin                       | 65.34% | 2.37% | ( 60.70% - 69.97% | ) |
| 8  | Chongqin                      | 74.93% | 2.46% | ( 70.11% - 79.74% | ) |
| 9  |                               |        |       |                   |   |
| 10 | <hr/>                         |        |       |                   |   |

11 ( To be continued )

12

13

14

15

16

17

18

19

20

21

22

23

24

25

26

27

28

29

30

31

32

33

34

35

36

37

38

39

40

41

42

43

44

45

46

47

48

49

50

51

52

53

54

55

56

57

58

59

60

For peer review only

1  
2  
3  
4  
5  
6  
7  
8  
9  
10  
11  
12  
13  
14  
15  
16  
17  
18  
19  
20  
21  
22  
23  
24  
25  
26  
27  
28  
29  
30  
31  
32  
33  
34  
35  
36  
37  
38  
39  
40  
41  
42  
43  
44  
45  
46

**Panel B (2/2)**

|                                | % of being satisfied |           |                     |  |        |           |                     |  |
|--------------------------------|----------------------|-----------|---------------------|--|--------|-----------|---------------------|--|
|                                | 2013                 |           |                     |  | 2015   |           |                     |  |
|                                | Mean                 | Std. Err. | [95% Conf.Interval] |  | Mean   | Std. Err. | [95% CI]            |  |
| <b>Satisfaction</b>            | 52.91%               | 0.78%     | ( 51.37% - 54.45% ) |  | 63.93% | 0.52%     | ( 62.90% - 64.95% ) |  |
| <b>Age</b>                     |                      |           |                     |  |        |           |                     |  |
| Age<60                         | 51.41%               | 0.93%     | ( 49.60% - 53.23% ) |  | 61.13% | 0.66%     | ( 59.85% - 62.42% ) |  |
| Age>=60                        | 55.86%               | 1.47%     | ( 52.99% - 58.74% ) |  | 68.46% | 0.89%     | ( 66.72% - 70.19% ) |  |
| <b>Gender</b>                  |                      |           |                     |  |        |           |                     |  |
| Male                           | 53.09%               | 1.11%     | ( 50.91% - 55.27% ) |  | 63.04% | 0.78%     | ( 61.52% - 64.56% ) |  |
| Female                         | 52.72%               | 1.12%     | ( 50.52% - 54.92% ) |  | 64.83% | 0.72%     | ( 63.42% - 66.25% ) |  |
| <b>Ethnic group</b>            |                      |           |                     |  |        |           |                     |  |
| Han                            | 52.37%               | 0.82%     | ( 50.77% - 53.97% ) |  | 63.60% | 0.55%     | ( 62.53% - 64.68% ) |  |
| Ethnic minority                | 59.46%               | 2.84%     | ( 53.89% - 65.03% ) |  | 68.25% | 1.87%     | ( 64.60% - 71.91% ) |  |
| <b>Marital status</b>          |                      |           |                     |  |        |           |                     |  |
| Single/separated/widow/widower | 52.19%               | 1.73%     | ( 48.80% - 55.59% ) |  | 64.10% | 1.15%     | ( 61.86% - 66.35% ) |  |
| Cohabitation& Married          | 53.20%               | 0.86%     | ( 51.52% - 54.88% ) |  | 63.85% | 0.58%     | ( 62.72% - 64.99% ) |  |
| <b>Employment status</b>       |                      |           |                     |  |        |           |                     |  |
| Not working                    | 53.10%               | 1.29%     | ( 50.57% - 55.64% ) |  | 65.14% | 0.80%     | ( 63.56% - 66.72% ) |  |
| Employed/Farm                  | 52.78%               | 0.99%     | ( 50.84% - 54.73% ) |  | 62.94% | 0.70%     | ( 61.56% - 64.32% ) |  |
| <b>Education</b>               |                      |           |                     |  |        |           |                     |  |
| Elementary School or less      | 56.77%               | 1.32%     | ( 54.18% - 59.37% ) |  | 70.19% | 0.83%     | ( 68.56% - 71.82% ) |  |
| Middle / high School           | 51.27%               | 1.13%     | ( 49.05% - 53.49% ) |  | 61.10% | 0.79%     | ( 59.55% - 62.65% ) |  |
| College                        | 49.45%               | 2.01%     | ( 45.51% - 53.40% ) |  | 57.43% | 1.40%     | ( 54.69% - 60.16% ) |  |
| Postgraduate                   | 45.15%               | 8.14%     | ( 29.20% - 61.10% ) |  | 49.41% | 5.62%     | ( 38.40% - 60.43% ) |  |
| <b>Self-reported health</b>    |                      |           |                     |  |        |           |                     |  |
| Very bad                       | 50.43%               | 4.74%     | ( 41.14% - 59.72% ) |  | 57.69% | 3.13%     | ( 51.56% - 63.82% ) |  |
| Bad                            | 48.76%               | 2.17%     | ( 44.51% - 53.01% ) |  | 62.56% | 1.40%     | ( 59.82% - 65.31% ) |  |

|    |                                                |        |       |                   |   |        |       |                   |   |  |
|----|------------------------------------------------|--------|-------|-------------------|---|--------|-------|-------------------|---|--|
| 1  |                                                |        |       |                   |   |        |       |                   |   |  |
| 2  |                                                |        |       |                   |   |        |       |                   |   |  |
| 3  |                                                |        |       |                   |   |        |       |                   |   |  |
| 4  |                                                |        |       |                   |   |        |       |                   |   |  |
| 5  | Average                                        | 50.13% | 1.83% | ( 46.54% - 53.72% | ) | 61.98% | 1.15% | ( 59.73% - 64.24% | ) |  |
| 6  | Good                                           | 53.78% | 1.26% | ( 51.31% - 56.25% | ) | 65.75% | 0.84% | ( 64.10% - 67.39% | ) |  |
| 7  | Very good                                      | 56.57% | 1.54% | ( 53.55% - 59.58% | ) | 64.75% | 1.15% | ( 62.50% - 67.00% | ) |  |
| 8  | <b>Self-reported household economic status</b> |        |       |                   |   |        |       |                   |   |  |
| 9  |                                                |        |       |                   |   |        |       |                   |   |  |
| 10 | Far below average                              | 46.27% | 3.70% | ( 39.02% - 53.52% | ) | 56.59% | 2.40% | ( 51.89% - 61.29% | ) |  |
| 11 | Below average                                  | 48.96% | 1.46% | ( 46.10% - 51.82% | ) | 60.26% | 0.96% | ( 58.39% - 62.14% | ) |  |
| 12 | Average                                        | 54.62% | 1.03% | ( 52.60% - 56.63% | ) | 66.30% | 0.71% | ( 64.91% - 67.68% | ) |  |
| 13 | Above average                                  | 61.12% | 2.72% | ( 55.79% - 66.46% | ) | 69.19% | 1.74% | ( 65.78% - 72.60% | ) |  |
| 14 |                                                |        |       |                   |   |        |       |                   |   |  |
| 15 | <b>Insurance status</b>                        |        |       |                   |   |        |       |                   |   |  |
| 16 | Without any health insurance                   | 46.92% | 2.49% | ( 42.05% - 51.79% | ) | 56.66% | 1.86% | ( 53.02% - 60.31% | ) |  |
| 17 | With any health insurance                      | 53.67% | 0.83% | ( 52.05% - 55.30% | ) | 64.70% | 0.55% | ( 63.63% - 65.78% | ) |  |
| 18 |                                                |        |       |                   |   |        |       |                   |   |  |
| 19 | <b>Residence status</b>                        |        |       |                   |   |        |       |                   |   |  |
| 20 | Urban                                          | 54.84% | 0.99% | ( 52.90% - 56.78% | ) | 59.18% | 0.70% | ( 57.81% - 60.55% | ) |  |
| 21 | Rural                                          | 50.05% | 1.28% | ( 47.54% - 52.55% | ) | 71.10% | 0.78% | ( 69.57% - 72.62% | ) |  |
| 22 |                                                |        |       |                   |   |        |       |                   |   |  |
| 23 | <b>Internal migrant</b>                        |        |       |                   |   |        |       |                   |   |  |
| 24 | No                                             | 53.60% | 0.82% | ( 51.99% - 55.21% | ) | 65.62% | 0.55% | ( 64.54% - 66.69% | ) |  |
| 25 | Yes                                            | 47.54% | 2.60% | ( 42.45% - 52.63% | ) | 49.98% | 1.78% | ( 46.50% - 53.46% | ) |  |
| 26 |                                                |        |       |                   |   |        |       |                   |   |  |
| 27 | <b>Regions or municipalities</b>               |        |       |                   |   |        |       |                   |   |  |
| 28 | East china ( without Shanghai)                 | 54.51% | 1.65% | ( 51.27% - 57.76% | ) | 60.94% | 1.09% | ( 58.81% - 63.07% | ) |  |
| 29 | Middle china                                   | 55.28% | 1.58% | ( 52.19% - 58.37% | ) | 71.70% | 0.98% | ( 69.78% - 73.61% | ) |  |
| 30 | West china (without Chongqin)                  | 53.64% | 1.65% | ( 50.40% - 56.88% | ) | 69.64% | 1.08% | ( 67.53% - 71.75% | ) |  |
| 31 | NEast china                                    | 43.13% | 2.10% | ( 39.01% - 47.24% | ) | 49.59% | 1.50% | ( 46.65% - 52.53% | ) |  |
| 32 | Beijing                                        | 51.63% | 3.32% | ( 45.13% - 58.14% | ) | 54.15% | 2.50% | ( 49.25% - 59.05% | ) |  |
| 33 | Shanghai                                       | 45.36% | 3.33% | ( 38.83% - 51.90% | ) | 57.20% | 2.48% | ( 52.34% - 62.07% | ) |  |
| 34 | Tianjin                                        | 66.85% | 3.47% | ( 60.04% - 73.66% | ) | 64.33% | 3.18% | ( 58.10% - 70.55% | ) |  |
| 35 | Chongqin                                       | 68.61% | 4.55% | ( 59.69% - 77.53% | ) | 79.12% | 2.73% | ( 73.77% - 84.48% | ) |  |

Note: Dep. Var. "Being satisfied" is a dummy variable, taking the value of "1" if a respondent's satisfaction score is greater than 70 points.

1  
2  
3  
4  
5  
6  
7  
8  
9  
10  
11  
12  
13  
14  
15  
16  
17  
18  
19  
20  
21  
22  
23  
24  
25  
26  
27  
28  
29  
30  
31  
32  
33  
34  
35  
36  
37  
38  
39  
40  
41  
42  
43  
44  
45  
46

For peer review only

**Table 3. Baseline analysis (logistic regression)**

Dep. Var. = "Being Satisfied"

| Variables                                      | Odds ratio | P-value | [95% Interval] | Conf. |
|------------------------------------------------|------------|---------|----------------|-------|
| <b>Demographic</b>                             |            |         |                |       |
| Age $\geq$ 60                                  | 1.19       | <0.001  | 1.08 - 1.32    |       |
| Female                                         | 1.03       | 0.513   | 0.95 - 1.11    |       |
| Cohabitation/Married                           | 0.93       | 0.108   | 0.84 - 1.02    |       |
| Han (Ethnic group)                             | 1.28       | 0.001   | 1.11 - 1.49    |       |
| Rural                                          | 1.23       | 0.009   | 1.05 - 1.44    |       |
| Internal migrant                               | 0.75       | <0.001  | 0.66 - 0.85    |       |
| Employed/Farm                                  | 0.97       | 0.452   | 0.89 - 1.06    |       |
| With any health insurance                      | 1.18       | 0.011   | 1.04 - 1.35    |       |
| <b>Education</b>                               |            |         |                |       |
| Elementary School or less                      | Ref.       |         |                |       |
| Middle / high School                           | 0.76       | <0.001  | 0.69 - 0.83    |       |
| College                                        | 0.65       | <0.001  | 0.57 - 0.75    |       |
| Postgraduate                                   | 0.55       | 0.002   | 0.37 - 0.80    |       |
| <b>Self-reported health</b>                    |            |         |                |       |
| Very bad                                       | Ref.       |         |                |       |
| Bad                                            | 1.04       | 0.721   | 0.82 - 1.32    |       |
| Average                                        | 1.18       | 0.163   | 0.93 - 1.49    |       |
| Good                                           | 1.45       | 0.002   | 1.15 - 1.83    |       |
| Very good                                      | 1.61       | <0.001  | 1.27 - 2.04    |       |
| <b>Self-reported household economic status</b> |            |         |                |       |
| Far below average                              | Ref.       |         |                |       |
| Below average                                  | 1.21       | 0.037   | 1.01 - 1.45    |       |
| Average                                        | 1.59       | <0.001  | 1.33 - 1.90    |       |
| Above average                                  | 2.05       | <0.001  | 1.64 - 2.55    |       |
| <b>Resources</b>                               |            |         |                |       |
| healthcare expenditure % in GDP                | 1.13       | <0.001  | 1.05 - 1.20    |       |
| Government % in healthcare expenditure         | 0.97       | <0.001  | 0.95 - 0.98    |       |
| Out of pocket %                                | 1.00       | 0.570   | 0.99 - 1.02    |       |
| Hospital beds/10k population                   | 1.04       | 0.057   | 1.00 - 1.08    |       |
| Healthcare workforce/10k population            | 0.92       | 0.117   | 0.83 - 1.02    |       |
| <b>Region</b>                                  |            |         |                |       |
| East china (without Shanghai)                  | Ref.       |         |                |       |
| Middle china                                   | 1.36       | 0.001   | 1.14 - 1.62    |       |
| West china (without Chongqin)                  | 1.28       | 0.019   | 1.04 - 1.58    |       |
| Northeast china                                | 0.49       | 0.000   | 0.41 - 0.59    |       |
| Beijing                                        | 0.83       | 0.342   | 0.56 - 1.22    |       |
| Shanghai                                       | 0.71       | 0.034   | 0.52 - 0.98    |       |
| Tianjin                                        | 1.48       | 0.001   | 1.17 - 1.86    |       |
| Chongqing                                      | 2.03       | <0.001  | 1.50 - 2.76    |       |
| <b>Year</b>                                    |            |         |                |       |
| Year2013                                       | Ref.       |         |                |       |
| Year2015                                       | 1.51       | 0.000   | 1.36 - 1.66    |       |

|   |                     |        |       |      |        |
|---|---------------------|--------|-------|------|--------|
| 1 |                     |        |       |      |        |
| 2 |                     |        |       |      |        |
| 3 | <b>Constant</b>     | 0.73   | 0.437 | 0.33 | - 1.61 |
| 4 | <b>Observations</b> | 15,969 |       |      |        |
| 5 | <b>R-squared</b>    | 0.07   |       |      |        |
| 6 |                     |        |       |      |        |
| 7 |                     |        |       |      |        |

8 **Note:** Dep. Var. "Being satisfied" is a dummy variable, taking the value of "1" if a  
9 respondent's satisfaction score is greater than 70 points.  
10  
11  
12  
13  
14  
15  
16  
17  
18  
19  
20  
21  
22  
23  
24  
25  
26  
27  
28  
29  
30  
31  
32  
33  
34  
35  
36  
37  
38  
39  
40  
41  
42  
43  
44  
45  
46  
47  
48  
49  
50  
51  
52  
53  
54  
55  
56  
57  
58  
59  
60

For peer review only



**Table 4 Regression of Resource, Rural & Years with Being Satisfied**

Dep. Var. = "Being Satisfied"

**Panel A**

| Variables                                  | Odds ratio | P-value | [95% Interval] | Conf. |
|--------------------------------------------|------------|---------|----------------|-------|
| Hospital beds/1k population * Rural        | 1.26       | 0.002   | 1.09           | 1.47  |
| Healthcare workforce/1k population * Rural | 0.96       | 0.545   | 0.84           | 1.09  |
| Rural                                      | 1.12       | 0.243   | 0.93           | 1.34  |
| <b>Constant</b>                            | 0.24       | 0.001   | 0.10           | 0.54  |
| <b>Observations</b>                        | 15,969     |         |                |       |

**Note:** The regression has controlled all other variables as listed in Table 3.**Panel B**

| Variables           | Odds ratio | P-value | [95% Interval] | Conf. |
|---------------------|------------|---------|----------------|-------|
| Rural               | 1.00       | 0.982   | 0.83           | 1.20  |
| Rural* Year 2015    | 1.57       | <0.001  | 1.30           | 1.90  |
| Year 2015           | 1.24       | 0.001   | 1.09           | 1.41  |
| <b>Constant</b>     | 0.92       | 0.845   | 0.42           | 2.05  |
| <b>Observations</b> | 15,969     |         |                |       |

**Note:** The regression has controlled all other variables as listed in Table 3.

**Table 5 Regression of Region & Years with Being Satisfied**

Dep.Var.= "Being Satisfied"

| Variables                               | Odds ratio | P-value | [95% Conf. Interval] |      |
|-----------------------------------------|------------|---------|----------------------|------|
| Year 2015                               | 1.23       | 0.022   | 1.03                 | 1.46 |
| East china (without Shanghai)           |            |         |                      |      |
| Middle china                            | 1.00       | 0.989   | 0.79                 | 1.27 |
| West china (without Chongqin)           | 0.99       | 0.955   | 0.76                 | 1.29 |
| NEast china                             | 0.46       | <0.001  | 0.36                 | 0.60 |
| Beijing                                 | 0.83       | 0.437   | 0.52                 | 1.32 |
| Shanghai                                | 0.62       | 0.065   | 0.38                 | 1.03 |
| Tianjin                                 | 1.72       | 0.004   | 1.20                 | 2.49 |
| Chongqing                               | 1.67       | 0.036   | 1.03                 | 2.69 |
| Year2015* East china (without Shanghai) |            |         |                      |      |
| Year2015*Middle china                   | 1.60       | <0.001  | 1.27                 | 2.02 |
| Year2015*West china (without Chongqin)  | 1.44       | 0.002   | 1.14                 | 1.82 |
| Year2015*NEast china                    | 1.07       | 0.610   | 0.82                 | 1.40 |
| Year2015* Beijing                       | 0.93       | 0.715   | 0.64                 | 1.35 |
| Year2015*Shanghai                       | 1.18       | 0.469   | 0.76                 | 1.83 |
| Year2015*Tianjin                        | 0.77       | 0.289   | 0.48                 | 1.24 |
| Year2015* Chongqin                      | 1.30       | 0.366   | 0.74                 | 2.30 |
| Constant                                | 0.93       | 0.862   | 0.42                 | 2.06 |
| Observations                            | 15,969     |         |                      |      |

**Note:** The regression has controlled the same variables as in Table 3.

STROBE Statement—Checklist of items that should be included in reports of *cross-sectional studies*

|                              | Item No | Recommendation                                                                                                                                                                                                                                                                                                                                                                                                                                                             |
|------------------------------|---------|----------------------------------------------------------------------------------------------------------------------------------------------------------------------------------------------------------------------------------------------------------------------------------------------------------------------------------------------------------------------------------------------------------------------------------------------------------------------------|
| <b>Title and abstract</b>    | 1       | (a) Indicate the study's design with a commonly used term in the title or the abstract: <a href="#">[Page1]</a><br>(b) Provide in the abstract an informative and balanced summary of what was done and what was found: <a href="#">[Page1]</a>                                                                                                                                                                                                                            |
| <b>Introduction</b>          |         |                                                                                                                                                                                                                                                                                                                                                                                                                                                                            |
| Background/rationale         | 2       | Explain the scientific background and rationale for the investigation being reported: <a href="#">[Page4-7]</a>                                                                                                                                                                                                                                                                                                                                                            |
| Objectives                   | 3       | State specific objectives, including any prespecified hypotheses: <a href="#">[Page5]</a>                                                                                                                                                                                                                                                                                                                                                                                  |
| <b>Methods</b>               |         |                                                                                                                                                                                                                                                                                                                                                                                                                                                                            |
| Study design                 | 4       | Present key elements of study design early in the paper: <a href="#">[Page10]</a>                                                                                                                                                                                                                                                                                                                                                                                          |
| Setting                      | 5       | Describe the setting, locations, and relevant dates, including periods of recruitment, exposure, follow-up, and data collection: <a href="#">[Page7-8]</a>                                                                                                                                                                                                                                                                                                                 |
| Participants                 | 6       | (a) Give the eligibility criteria, and the sources and methods of selection of participants: <a href="#">[Page9]</a>                                                                                                                                                                                                                                                                                                                                                       |
| Variables                    | 7       | Clearly define all outcomes, exposures, predictors, potential confounders, and effect modifiers. Give diagnostic criteria, if applicable: <a href="#">[Page9-10]</a>                                                                                                                                                                                                                                                                                                       |
| Data sources/<br>measurement | 8*      | For each variable of interest, give sources of data and details of methods of assessment (measurement). Describe comparability of assessment methods if there is more than one group: <a href="#">[Page12-13&amp;Page38-40]</a>                                                                                                                                                                                                                                            |
| Bias                         | 9       | Describe any efforts to address potential sources of bias: <a href="#">[Page9,16]</a>                                                                                                                                                                                                                                                                                                                                                                                      |
| Study size                   | 10      | Explain how the study size was arrived at: <a href="#">[Page7-8]</a>                                                                                                                                                                                                                                                                                                                                                                                                       |
| Quantitative variables       | 11      | Explain how quantitative variables were handled in the analyses. If applicable, describe which groupings were chosen and why: <a href="#">[Page9]</a>                                                                                                                                                                                                                                                                                                                      |
| Statistical methods          | 12      | (a) Describe all statistical methods, including those used to control for confounding: <a href="#">[Page10]</a><br>(b) Describe any methods used to examine subgroups and interactions: <a href="#">[Page10]</a><br>(c) Explain how missing data were addressed: <a href="#">[Page8]</a><br>(d) If applicable, describe analytical methods taking account of sampling strategy: <a href="#">[N/A]</a><br>(e) Describe any sensitivity analyses: <a href="#">[Page9,16]</a> |
| <b>Results</b>               |         |                                                                                                                                                                                                                                                                                                                                                                                                                                                                            |
| Participants                 | 13*     | (a) Report numbers of individuals at each stage of study—eg numbers potentially eligible, examined for eligibility, confirmed eligible, included in the study, completing follow-up, and analysed: <a href="#">[Page8,10-11]</a><br>(b) Give reasons for non-participation at each stage: <a href="#">[N/A]</a><br>(c) Consider use of a flow diagram: <a href="#">[N/A]</a>                                                                                               |
| Descriptive data             | 14*     | (a) Give characteristics of study participants (eg demographic, clinical, social) and information on exposures and potential confounders: <a href="#">[Page 11,24-25]</a><br>(b) Indicate number of participants with missing data for each variable of interest: <a href="#">[N/A]</a>                                                                                                                                                                                    |
| Outcome data                 | 15*     | Report numbers of outcome events or summary measures: <a href="#">[Page11-13,24-40]</a>                                                                                                                                                                                                                                                                                                                                                                                    |
| Main results                 | 16      | (a) Give unadjusted estimates and, if applicable, confounder-adjusted estimates and their precision (eg, 95% confidence interval). Make clear which confounders were adjusted for and why they were included: <a href="#">[Page13-16,26-40]</a>                                                                                                                                                                                                                            |

1  
2  
3  
4  
5  
6  
7  
8  
9  
10  
11  
12  
13  
14  
15  
16  
17  
18  
19  
20  
21  
22  
23  
24  
25  
26  
27  
28  
29  
30  
31  
32  
33  
34  
35  
36  
37  
38  
39  
40  
41  
42  
43  
44  
45  
46  
47  
48  
49  
50  
51  
52  
53  
54  
55  
56  
57  
58  
59  
60

(b) Report category boundaries when continuous variables were categorized:[Page9]

(c) If relevant, consider translating estimates of relative risk into absolute risk for a meaningful time period:[N/A]

|                          |    |                                                                                                                                                                                        |
|--------------------------|----|----------------------------------------------------------------------------------------------------------------------------------------------------------------------------------------|
| Other analyses           | 17 | Report other analyses done—eg analyses of subgroups and interactions, and sensitivity analyses:[Page14-16]                                                                             |
| <b>Discussion</b>        |    |                                                                                                                                                                                        |
| Key results              | 18 | Summarise key results with reference to study objectives:[Page17]                                                                                                                      |
| Limitations              | 19 | Discuss limitations of the study, taking into account sources of potential bias or imprecision. Discuss both direction and magnitude of any potential bias:[Page16-17]                 |
| Interpretation           | 20 | Give a cautious overall interpretation of results considering objectives, limitations, multiplicity of analyses, results from similar studies, and other relevant evidence:[Page13-17] |
| Generalisability         | 21 | Discuss the generalisability (external validity) of the study results:[Page16]                                                                                                         |
| <b>Other information</b> |    |                                                                                                                                                                                        |
| Funding                  | 22 | Give the source of funding and the role of the funders for the present study and, if applicable, for the original study on which the present article is based:[Page17-18]              |

\*Give information separately for exposed and unexposed groups.

**Note:** An Explanation and Elaboration article discusses each checklist item and gives methodological background and published examples of transparent reporting. The STROBE checklist is best used in conjunction with this article (freely available on the Web sites of PLoS Medicine at <http://www.plosmedicine.org/>, Annals of Internal Medicine at <http://www.annals.org/>, and Epidemiology at <http://www.epidem.com/>). Information on the STROBE Initiative is available at [www.strobe-statement.org](http://www.strobe-statement.org).

# BMJ Open

## Public satisfaction with the healthcare system in China during 2013-2015: A cross-sectional survey of the associated factors

|                                 |                                                                                                                                                                                                                                                                                                                                                                           |
|---------------------------------|---------------------------------------------------------------------------------------------------------------------------------------------------------------------------------------------------------------------------------------------------------------------------------------------------------------------------------------------------------------------------|
| Journal:                        | <i>BMJ Open</i>                                                                                                                                                                                                                                                                                                                                                           |
| Manuscript ID                   | bmjopen-2019-034414.R2                                                                                                                                                                                                                                                                                                                                                    |
| Article Type:                   | Original research                                                                                                                                                                                                                                                                                                                                                         |
| Date Submitted by the Author:   | 21-Apr-2020                                                                                                                                                                                                                                                                                                                                                               |
| Complete List of Authors:       | Zhang, Jing Hua; Macau University of Science and Technology<br>peng, xinxin; Macau University of Science and Technology<br>Liu, Chengkun; Macau University of Science and Technology<br>Chen, Yijun; Macau University of Science and Technology<br>Zhang, Hongmin; Macau University of Science and Technology<br>Iwaloye, Ojo; Macau University of Science and Technology |
| <b>Primary Subject Heading</b>: | Health policy                                                                                                                                                                                                                                                                                                                                                             |
| Secondary Subject Heading:      | Health services research                                                                                                                                                                                                                                                                                                                                                  |
| Keywords:                       | public satisfaction, health system in China, rural health, Health policy < HEALTH SERVICES ADMINISTRATION & MANAGEMENT                                                                                                                                                                                                                                                    |
|                                 |                                                                                                                                                                                                                                                                                                                                                                           |

SCHOLARONE™  
Manuscripts



I, the Submitting Author has the right to grant and does grant on behalf of all authors of the Work (as defined in the below author licence), an exclusive licence and/or a non-exclusive licence for contributions from authors who are: i) UK Crown employees; ii) where BMJ has agreed a CC-BY licence shall apply, and/or iii) in accordance with the terms applicable for US Federal Government officers or employees acting as part of their official duties; on a worldwide, perpetual, irrevocable, royalty-free basis to BMJ Publishing Group Ltd ("BMJ") its licensees and where the relevant Journal is co-owned by BMJ to the co-owners of the Journal, to publish the Work in this journal and any other BMJ products and to exploit all rights, as set out in our [licence](#).

The Submitting Author accepts and understands that any supply made under these terms is made by BMJ to the Submitting Author unless you are acting as an employee on behalf of your employer or a postgraduate student of an affiliated institution which is paying any applicable article publishing charge ("APC") for Open Access articles. Where the Submitting Author wishes to make the Work available on an Open Access basis (and intends to pay the relevant APC), the terms of reuse of such Open Access shall be governed by a Creative Commons licence – details of these licences and which [Creative Commons](#) licence will apply to this Work are set out in our licence referred to above.

Other than as permitted in any relevant BMJ Author's Self Archiving Policies, I confirm this Work has not been accepted for publication elsewhere, is not being considered for publication elsewhere and does not duplicate material already published. I confirm all authors consent to publication of this Work and authorise the granting of this licence.

## Title Page

**Article title: Public satisfaction with the healthcare system in China during  
2013-2015: A cross-sectional survey of the associated factors**

### **Authors:**

Jing Hua Zhang\*<sup>1</sup>, Xinxin Peng<sup>1</sup>, Chengkun Liu<sup>1</sup>, Yijun Chen, Hongmin Zhang<sup>1</sup>, Ojo  
Olukayode Iwaloye<sup>1</sup>

**Affiliation:** 1 School of Business, Macau University of Science and Technology,  
Macao S.A.R., China

\***Correspondence** to Dr. Jing Hua Zhang, [jhuzhang@must.edu.mo](mailto:jhuzhang@must.edu.mo)

School of Business

Macau University of Science and Technology

Macau S.A.R., China

Tel: (+853) 8897-2986

Fax: +853 2882-7666

**Keywords:** public satisfaction, healthcare system in China, rural health, health policy

**Word count:** 4305

1  
2  
3  
4  
5  
6  
7  
8  
9  
10  
11  
12  
13  
14  
15  
16  
17  
18  
19  
20  
21  
22  
23  
24  
25  
26  
27  
28  
29  
30  
31  
32  
33  
34  
35  
36  
37  
38  
39  
40  
41  
42  
43  
44  
45  
46  
47  
48  
49  
50  
51  
52  
53  
54  
55  
56  
57  
58  
59  
60

## Public satisfaction with the healthcare system in China during 2013-2015: A cross-sectional survey of the associated factors

### Abstract

**Objective** We explore how public satisfaction with the healthcare system in China varies with social and economic factors, especially within regional variations and changes during 2013 to 2015.

**Design** Population-based, cross-sectional survey performed between July 2013 and July 2015.

**Setting** General population of China during 2013 to 2015

**Participants** 15,969 total participants (women=49.4%, sample-weighted average age =51.9)

**Primary outcome measure** Public satisfaction with the healthcare system, defined as “being satisfied” if a respondent’s satisfaction score  $\geq 70$  points

**Results** 1) The two-year mean of the satisfaction score of the sample is 68.5 out of 100 points and the score in 2015 is higher than 2013 by 3.5 points. 2) Senior respondents (OR=1.19,  $p<0.001$ ), rural respondents (OR=1.23,  $p=0.009$ ) and those with higher socioeconomic status are more likely to report being satisfied. Internal migrants (OR=0.75,  $p<0.001$ ) and those with a higher level of education are less likely to report being satisfied. 3) Total health expenditure as percentage of GDP and density of hospital beds have a significant positive association with satisfaction (OR=1.13,  $p<0.001$ ). Meanwhile, the government’s share in total healthcare expenditures has a moderately negative association with satisfaction (OR=0.97,  $p<0.001$ ). In rural areas, the density of hospital beds has a positive association with satisfaction (OR=1.26,  $p=0.002$ ). 4) The Northeast region and Shanghai (OR =0.49,  $p<0.001$ ; OR=0.71,  $p=0.034$ ) are less likely to report being satisfied, and remained unchanged in 2015.

**Conclusion** There are considerable disparities in public satisfaction with the healthcare system in China, associated with demographic and socioeconomic characteristics, regional locations, urban-rural environment, and regional health resource abundance. Actions are recommended to improve satisfaction with the public healthcare system, especially in the Northeast region of China.



### Strengths and limitations of this study

- Public satisfaction with healthcare systems has been considered one of the most coherent indicators of the general subjective evaluation of the healthcare system and effectiveness of the reform.
- This study analyzed a national representative sample of more than 15,969 respondents from two waves of surveys during the ongoing healthcare reform.
- This study provides empirical evidence about the rural-city disparity and the regional variations in healthcare satisfaction in China, which have not yet been well studied.
- The survey dataset contains only one global satisfaction score, making it difficult to further attribute the satisfaction or dissatisfaction to specific reform actions or issues of the healthcare system.
- Public satisfaction may be biased by confounding factors such as media reports and political discussion, or the citizens' expectations.

## Public satisfaction with the healthcare system in China during 2013-2015: A cross-sectional survey of the associated factors

### INTRODUCTION

Public satisfaction with healthcare systems measures the general population's satisfaction. Unlike patient satisfaction, which focuses on those who directly utilize the healthcare services, public satisfaction has been considered one of the most coherent indicators of the general subjective evaluation of the healthcare system, as well as the acceptability and effectiveness of healthcare reform[1, 2]. A Public satisfaction indicator has several advantages. First, it gathers information on satisfaction from the whole population, including both direct users and non-users of healthcare services. Second, it represents a mixture of citizens' personal experiences with the healthcare system, beyond the provision of quality services[2]. It may also include the broader views of the social affairs in the country, social welfare culture and media portrayals of the healthcare system[3, 4]; Third, it may affect how the general population utilizes services and their trust in the system[5].

In short, public satisfaction with a healthcare system has become integral to cross-country and across-time comparisons of healthcare systems[3, 4, 6], as well as healthcare policy evaluations[4, 7]. During the past decade, studies about public satisfaction have received increasing attention, reflecting the shift towards a people-centered healthcare system and the emphasis on the responsiveness of the system[4].

For decades the priority of the healthcare system in China has been set to meet basic survival needs, such as reducing mortality[8, 9]. Public satisfaction was not included in any official measurement in China. However, since China has achieved a rapid decline in mortality and an unprecedented increase in life expectancy over the past decade, the issue of public satisfaction in China, among many other aspects of the healthcare system, has received increased attention. The phenomenally intense physician-patient relationship has further fueled interest in public satisfaction [8-10]. This has led to the goal of People-centered Integrated Care as the focus of the

1  
2  
3  
4 transition to Healthy China 2030, the new healthcare reform program.

5  
6 Currently, there is only a small body of literature studying the public satisfaction of  
7  
8 the healthcare system in China and its related factors[11-13]. Most are only based on  
9  
10 small survey samples at the province level[14, 15]. Some studies focus on public  
11  
12 dissatisfaction with the integration reforms of health insurance schemes[16]. To our  
13  
14 knowledge, no prior studies have systematically examined the nation-wide public  
15  
16 satisfaction of the healthcare system upon the second phase of healthcare reform from  
17  
18 2013 to 2015.

19  
20 Specifically, the objectives of this study are: (1) to explore the basic factors  
21  
22 (demographic, socioeconomic and public healthcare resources) associated with public  
23  
24 satisfaction of the healthcare system in China; (2) to examine how public satisfaction  
25  
26 with the healthcare system differs between the urban and rural residents, as well as in  
27  
28 the major economic regions of China; (3) to examine changes in public satisfaction  
29  
30 with the healthcare system between 2013 and 2015.

## 31 32 **HEALTHCARE SYSTEM AND REFORM BACKGROUND FOR CHINA**

### 33 34 *Institution Background*

35  
36 The healthcare system in China is largely a public hospital-based delivery system  
37  
38 under the administration of the National Health Commission of the People's Republic  
39  
40 of China [17]. In China, public hospitals provide more than 90% of healthcare  
41  
42 services[9]. A national accreditation system classifies hospitals into primary,  
43  
44 secondary and tertiary levels according to characteristics such as numbers of beds,  
45  
46 professional healthcare force, diagnosis and treatment equipment, and operational  
47  
48 area sizes[17]. The basic health insurance coverage in China provided by three major  
49  
50 national health insurance systems has increased significantly during the past decade  
51  
52 and has reached 98% of the whole population in recent years[18].

### 53 54 *Existing Issues and challenges*

55  
56 There has been a large volume of literature produced about the reform of China's  
57  
58 healthcare system in the past decades[8, 19-24]. Due to the privatization and  
59  
60 market-oriented reform of the healthcare system in China during the 1980s and 1990s,

1  
2  
3  
4 by the first decade of the 2000s, there were widespread complaints about unaffordable  
5 basic healthcare services and difficulties with basic healthcare access[24, 25]. The  
6 disparity in healthcare status had gradually increased across the country and become a  
7 major public policy concern[26]. Meanwhile, due to the fast growth of the economy  
8 and residents' income, together with rapid urbanization in China, there has been an  
9 increasingly unmet demand for healthcare services along with higher expectations for  
10 the quality and experience of the healthcare system[27].

11  
12 The major issues with the system late in the first decade of the 2000s can be  
13 summarized as follows: (1) Rising healthcare costs and a high ratio of out-of-pocket  
14 expenditure. In 2013, the reimbursement rates for inpatient care were in the range of  
15 50% to 69%, according to a resident's health insurance type, which was based on the  
16 permanent residence registration system (rural or urban "Hukou") and/or employment  
17 status[13, 18]. (2) There are large socioeconomic disparities and geographic inequities  
18 in healthcare source allocation and utilization, especially between the urban and rural  
19 areas[9]. (3) The financial incentive in the reimbursement of and fee-for-service (FFS)  
20 payment models led to excessive treatment and over prescription[9, 28]. As  
21 a consequence, there has arisen a deep distrust of physicians by the public[8, 10, 27].  
22 (4) Difficulties in healthcare access. Despite the financial incentive of the  
23 reimbursement of health insurance, no strict referral or gate-keeping system has been  
24 enforced in China yet. Patients are still free to self-refer to preferred hospitals  
25 regardless of the severity of their sickness[27]. As a result, almost all major hospitals  
26 in China are over demanded and operate over their capacity. While a patients' clinic  
27 wait time could be as long as a full day, physicians were overloaded and could only  
28 ration a few minutes to meet with a patient for technical diagnosis assistance. This  
29 minimal physician-patient interaction was perceived by patients as poor service  
30 quality and further deteriorated the patient-physician relationship[9]. Together with  
31 the deep mistrust and frustration on the part of the public, there had been rising  
32 numbers of violent incidents against healthcare professionals in the early  
33 2000's[29-31].

## ***2009 Healthcare Reform in China***

In 2009, the Chinese government launched a new wave of healthcare reform actions as part of “the 12<sup>th</sup> Five-Year Plan”, aiming to establish a basic universal healthcare system of safe, effective and affordable service by 2020. To achieve this objective, the government set priorities for achievements in five major areas, including (a) expanding public health insurance, (b) establishment of an Essential Drug System (c) reforming public hospitals, (d) providing primary healthcare service, and (e) equity of public healthcare services[9].

The healthcare reform was implemented in two sequential phases: (1) The first phase (2009 to 2012) aimed to reallocate resources to healthcare development, to expand the coverage of basic health insurance, and to set up an Essential Drug System. (2) The second phase (2013 to 2015) focused on reforming public hospitals, including the pricing models of healthcare services and prescription drugs[24]. To remove the financial incentives of overprescribing, a Zero-Mark-up Drug Policy was implemented among provincial public hospitals (the tertiary-level hospitals) during 2013-2015, after pilot tests in county hospitals in 2012[24].

The implementation of the healthcare reform has varied across provinces and regions in China[32]. Firstly, the governments of provinces and cities had the discretion to tailor the service level according to the availability of local fiscal budgets[9]. Secondly, some reform actions were first experimented with as pilot projects in selected cities or provinces. For example, public hospitals in Beijing started diagnosis-related groups (DRGs) payment reform starting in 2011[9, 33]. 100 pilot cities ran a drug-zero-markup policy from 2012 to 2015.

## **METHOD**

### ***Data availability statement***

The survey data analyzed in this study is the Chinese General Social Survey (CGSS), a national representative continuous survey project available in China since 2003, publicly downloadable at <http://www.cnsda.org/index.php>.

The data of healthcare resources and expenditure on the provincial level were

1  
2  
3 obtained from the China Public Health Statistical Yearbook 2013 and 2015, accessible  
4 through subscription-based databases  
5  
6 (<http://cdi.cnki.net/Titles/SingleNJ?NJCode=N2010090866> )  
7  
8  
9

### 10 ***Data source introduction***

11 The CGSS aims to collect dynamic information about Chinese residents' life quality.  
12 It first included a single question about public satisfaction with the healthcare system  
13 in 2013, and then in 2015 included a set of detailed questions about public satisfaction  
14 regarding various aspects of public healthcare provision. The timing of these two  
15 surveys matched well with the agenda of the 2nd phase of the 2009 Healthcare  
16 Reform, and thus has provided good opportunities to study how public satisfaction  
17 has changed after the implementation of the reform. These data are the latest available  
18 ones containing public satisfaction with the healthc are system in China. This study  
19 adopts the combined datasets from the two waves in 2013 and 2015.  
20  
21

22 Administered throughout all 31 provinces and municipalities in China, both waves of  
23 the CGSS surveys adopted the same multi-stage stratified sampling design. The  
24 Primary Sampling Unit (PSU) is a county-level unit and there are 2,762 PSUs in the  
25 sampling frame. In each wave, the CGSS sampled about 12,000 households and a  
26 KISH grid procedure was used to randomly select one adult respondent (18 years of  
27 age or older) from each household for a face-to-face in-home interview. Sampling  
28 weights were included to reflect the general population parameters of the survey year.  
29 The final sample contains 15,969 observations from the CGSS 2013 and 2015  
30 combined, after deleting observations with important missing variables. There are  
31 only 5566 observations from the 2013 wave because the CGSS 2013 was designed to  
32 sample only about half of all respondents to answer the public healthcare satisfaction  
33 survey.  
34  
35  
36  
37  
38  
39  
40  
41  
42  
43  
44  
45  
46  
47  
48  
49

### 50 ***Data analysis and ethical considerations***

51 The Chinese General Social Survey (CGSS), the main data analyzed in this study, was  
52 originally collected by the National Survey Research Center at Renmin University  
53 of China. The CGSS abides by the Statistics Law of the People's Republic of China.  
54 The publicly disclosed survey data has been anonymized, following rigorous ethical  
55 practice and academic standards. As for the public healthcare resource data used in  
56  
57  
58  
59  
60

1  
2  
3 this study, they are obtained from the China Public Health Statistical Yearbook,  
4 another government publication.

5  
6 This study analyzes the above-mentioned of publicly available ethical data and did not  
7 collect any individual data directly. Therefore, this study did not require extra ethics  
8 approval.  
9

### 10 11 ***Patient and public involvement***

12 We discussed with physicians and government officials of public healthcare  
13 administration in China about their viewpoint of the public satisfaction about the  
14 health care system. We also discussed with them about the analysis results in this  
15 study.  
16  
17

18 No patients were directly involved in this study. No experimental designs were  
19 involved.  
20  
21  
22  
23  
24  
25  
26

### 27 ***Dependent variable***

28 Public satisfaction with the healthcare system. The measurement is based on the  
29 single question, ‘Taking all aspects into consideration, what is your general  
30 satisfaction with the healthcare system?’ Respondents were asked to assign a score  
31 between 0 to 100, with ‘0’ representing totally unsatisfied and ‘100’ for totally  
32 satisfied. As reported in Table 1, the average satisfaction score of the whole sample is  
33 68.5. It is observed that the satisfaction scores of most responses concentrated on four  
34 integrals such as 50, 60, 70, and 80 points. In Chinese culture, 60 points mean  
35 “Passing/neutral”, 70 points means “good, satisfied”, 80 points and above means  
36 “very good, very satisfied”. 40% of the respondents reported a satisfaction score  
37 higher than 70 points.  
38  
39  
40  
41  
42  
43  
44  
45

46 To be consistent with the literature[5, 34], a dummy variable of “being satisfied” was  
47 constructed, taking the value of ‘1’ if a respondent’s satisfaction score is greater than  
48 or equal to 70 points[34].  
49  
50  
51  
52

### 53 ***Independent variables***

54 Demographic and socioeconomic characteristics. Control variables included gender  
55 (1= female), age group (1= those equal to or older than 60 years), minority ethnic  
56 group (1= Yes ), marital status (1= married/living together), and education level ( a  
57  
58  
59  
60

category variable). General physical health condition was measured by a single item: ‘How do you evaluate your health condition overall?’ Respondents rated on a five-point Likert scale (1=very unhealthy, 2 = unhealthy, 3 = so-so, 4 = healthy, and 5 = very healthy). Socioeconomic information included living area (urban or rural), internal migrant status (1=Yes), employment status (employed =1), primary health insurance status (1=Yes) and basic pension status (1=Yes). Household social-economic status was measured as ‘below the average’, ‘middle class’, ‘middle-high’, and ‘high’, according to the respondent’s answer to a single item: ‘How do you assess your relative economic condition in the society?’.

Healthcare resources on an aggregated level. Key indicators of the public healthcare resources included total health expenditure as a percentage of GDP, the government’s percentage of total expenditure on healthcare, out-of-pocket percentage of individuals, the densities of the health workforce and hospital beds[4] (per 1,000 population) in rural and urban areas of each province respectively.

Year and region dummy variables. Dummy variables were included to identify the major economic regions in China (East, Central, West, and Northeast regions) according to the official classification standard, as well as the municipalities (Beijing, Shanghai, Tianjin, and Chongqing), which have relatively abundant healthcare resources and are also the pilot cities of some healthcare reforms. A dummy variable was included to identify the survey wave of the year 2015.

### ***Statistical analysis***

The baseline model is a multivariate logistic regression model[4, 5, 35, 36], analyzing the major factors associated with China residents’ satisfaction with the healthcare system. The dependent variable was the dummy variable of “being satisfied” with the healthcare system. The independent variables included all individual and provincial level variables as introduced in the Measures section.

In step two, interaction terms of rural and healthcare resource variables were constructed to examine the rural disparities. An interaction term for the rural area and a year dummy for 2015 was also constructed to examine how the satisfaction in rural areas changed between the years 2013 and 2015.

In step three, interaction terms of region dummies and year 2015 were adopted to examine the changes in the geographic variations over time. All regressions were



1  
2  
3 conducted in STATA 15, weight-adjusted, using the survey weights provided in the  
4 original datasets.  
5  
6  
7

## 8 **RESULTS**

### 9 *Descriptive statistics*

10  
11 Table 1 and Table 2 reports the demographic statistics of the participants Table 1 and  
12 summary information of the healthcare resources in various regions of China (Table  
13 2). The total observation numbers are weight-adjusted, using the survey weights  
14 provided in the original datasets.  
15  
16

17  
18 As reported in Table 3, the mean satisfaction score of the sample is 68.5 out of 100  
19 points. The scores in 2013 and 2015 are 66.2 and 69.7 respectively. Panel B of Table  
20 3 reports the percentage of respondents who scored above 70 points and are classified  
21 as “being satisfied with the healthcare system”. This ratio was 52.9% in 2013, then  
22 63.9% in 2015, suggesting that public satisfaction with the healthcare system in China  
23 had made general improvement during the study period.  
24  
25  
26  
27  
28  
29

### 30 *Baseline analysis*

31  
32 Table 4 reports the logistic regression results of the demographic characteristics of the  
33 baseline analysis. Senior respondents (older than or equal to 60 years) are  
34 significantly more likely, by 19 percentage points (OR=1.19,  $p<0.001$ ), to report  
35 being satisfied with the healthcare system.  
36  
37

38  
39 Respondents from rural areas on average are more likely to report being satisfied  
40 (OR=1.23,  $p=0.009$ ). Those from ethnic minority groups, with basic health insurance  
41 [37, 38], with better self-reported health, or with higher self-rated social-economic  
42 status, are at greater odds of reporting being satisfied. Meanwhile, internal migrants  
43 (OR=0.75,  $p<0.001$ ) and those with a higher level of education[13] are less likely to  
44 report being satisfied.  
45  
46  
47  
48  
49

50  
51 As for the association with province-level health resources and expenditures, higher  
52 total health expenditure as a percentage of GDP and density of hospital beds are  
53 significantly associated with a higher probability of reporting as being satisfied  
54 (OR=1.13,  $p<0.001$ ). Meanwhile, the government’s share in total healthcare  
55 expenditure has a moderately negative association with satisfaction (OR=0.97,  
56  $p<0.001$ ). Out-of-pocket percentage and the density of the healthcare workforce are  
57  
58  
59  
60

1  
2  
3 insignificant.

4  
5 Additionally, in the year 2015, the respondents were on average more likely than in  
6 the year 2013 by 51 percentage points to report being satisfied.  
7  
8  
9

### 10 ***Rural disparities and changes***

11 As reported in Table 5, in the rural area the density of hospital beds is positively  
12 associated with higher satisfaction (OR=1.26, p= 0.002). The effect is even stronger  
13 than the main effect (OR=1.02, p= 0.057) in Table 4. The density of the healthcare  
14 workforce in rural areas or the dummy variable rural area is not significant in this  
15 specification.  
16  
17  
18  
19

20 Table 6 reports the changes in rural China during the period from 2013 to 2015. The  
21 coefficients of Rural\*2015 indicates that rural residents are more likely by 57  
22 percentage points in 2015 to report being satisfied (OR=1.57, p<0.001). After  
23 including the interaction term of rural area and Year 2015, the odds ratio of the rural  
24 area is reduced to be 1.00 and totally insignificant, while Year 2015 is still significant  
25 though the absolute value of its coefficient became smaller.  
26  
27  
28  
29  
30  
31

### 32 ***Regional variations***

33 As shown in Table 4, with East China as the baseline region, Middle and West China  
34 regions (OR=1.36, p=0.001; OR=1.28, p=0.019), together with Tianjin and  
35 Chongqing municipalities (OR=1.48, p=0.001; OR=2.03, p<0.001), are on average  
36 more likely to report being satisfied. On the other hand, the Northeast region and  
37 Shanghai (OR=0.49, p<0.001; OR=0.71, p=0.034) are less likely by about 51 to 30  
38 percentage points respectively. Beijing is not significantly different from the East  
39 region.  
40  
41  
42  
43  
44  
45

46 After the interaction terms of Year 2015 and regions are controlled, the results  
47 reported in Table 7 indicate that the differences in Middle and West China regions are  
48 no longer significant, but the differences in Tianjin, Chongqing, Shanghai and the  
49 Northeast region of China are robust and consistent.  
50  
51  
52  
53  
54

### 55 ***Changes in 2015***

56 The dummy variable Year 2015 captures the average changes in the public  
57 satisfaction. As reported in Table 4 and Table 7, the odds ratios of Year 2015 are 1.36  
58  
59  
60

1  
2  
3 and 1.23 respectively, highly significant in both specifications.  
4

5 In 2015, after controlling for the average year effect and region effects, respondents  
6 from the Middle (OR=1.60,  $p<0.001$ ) and the West China regions (OR=1.44,  $p=0.002$ )  
7 are significantly more likely to report being satisfied than those from the base group  
8 of East China region. Meanwhile, there was no significant improvement in the  
9 Northeast region or Shanghai City, though respondents from these two regions tend to  
10 report being less satisfied.  
11  
12  
13  
14  
15

## 16 **Discussion**

### 17 *Demographic and socioeconomic characteristics*

18  
19 The association relationships between the various demographic characteristics and the  
20 public satisfaction with the healthcare system found in this study are all consistent  
21 with existing literature. For example, seniors[13, 39], those with better self-rated  
22 health[37], and those with higher social economic status[40] are more likely to report  
23 being satisfied[14, 15]. Those are with a lower level of education[13] and those in  
24 rural areas[13, 35] are more likely to report being satisfied too[15].  
25  
26  
27  
28  
29  
30

31 This phenomenon may be explained by the role of the respondents' expectations [3, 5,  
32 36]. Residents with a lower level of education and in rural areas of China have had a  
33 lower level of expectation. In past decades, they only had very limited access to  
34 public healthcare resources and social welfare. Also, they are usually unaware of their  
35 citizenship entitlements or patient rights[13, 18, 41].  
36  
37  
38  
39  
40

### 41 *Healthcare resources*

42  
43 Generally, a larger healthcare workforce and more resources are associated with a  
44 higher level of public satisfaction with the healthcare system[42, 43]. However, this  
45 study has mixed findings.  
46  
47

- 48 1) There are positive associations between public satisfaction and the expenditure on  
49 healthcare as a percentage of GDP, as well as the density of hospital beds. These  
50 findings are consistent with the general perception in the literature[4, 34, 42, 43].
- 51 2) A higher level of healthcare professionals in the population usually appears to  
52 increase overall patient satisfaction[34, 44, 45] , however, the estimates of this  
53 factor are not statistically significant in this study. Actually, the higher quality of  
54 public hospitals in the developed regions of China has attracted patients from all  
55  
56  
57  
58  
59  
60

1  
2  
3 over the country and is always overcrowded and experiencing overcapacity  
4 situations[9].Hence, the nominal healthcare professional density in the population  
5 may not reflect the actual healthcare resources accessible by the permanent  
6 residents in those areas.  
7  
8  
9

- 10 3) Generally, a lower out of pocket expense is preferred by the population [34, 44].  
11 However, this study found no significant role from the ratio of out of pocket  
12 expenses. This study has found that there is a moderate negative association with  
13 the share of government expenditure on satisfaction with healthcare. This finding  
14 is different from those in European countries[4, 34, 45]. There could be several  
15 potential explanations about this paradox. First, the negative association may  
16 reflect the shares of government expenditures in poorer regions, which have  
17 increased as the result of healthcare reform in China. However, it takes a longer  
18 time and it is a challenging, systematic task to improve the public satisfaction with  
19 the healthcare system in those areas. Second, accessing preferred care is highly  
20 important to the satisfaction of some citizens[6], but healthcare choices are further  
21 limited when the government is taking a greater share of the expenditure. For  
22 example, with the implementation of the Essential Drug Lists and Drug  
23 Zero-mark-up policy in public hospitals in China, the availability of preferred  
24 therapies are limited[3, 24]. Third, there is also the possibility that some  
25 government expenditure on healthcare may have not been allocated appropriately  
26 or efficiently. For instance, the funding may have been allocated to sophisticated  
27 but unnecessary medical equipment. Future research should continue to explore  
28 and investigate this phenomenon.  
29  
30  
31  
32  
33  
34  
35  
36  
37  
38  
39  
40  
41  
42  
43  
44

### 45 ***Rural disparities***

46 As reported in Table 5, the density of hospital beds in rural areas of China has a  
47 strong positive association with the satisfaction of respondents (OR=1.26, p=0.002),  
48 whereas the odds ratio is only 1.04 (p=0.057) in the baseline model. This  
49 phenomenon may be explained as follows. First, hospitalization is often perceived in  
50 China as health care of better quality and with more experienced physicians. Second,  
51 hospitalization is often preferred by many patients in China because inpatient service  
52 has a higher reimbursement ratio than outpatient service[18, 27]. Third, in rural areas  
53 of China, hospitalization can be especially helpful assuring a patient with having  
54  
55  
56  
57  
58  
59  
60

1  
2  
3 access to quality medical care and alleviating the commuting needs from distantly  
4 located home places[41]. Additionally, if admitted to hospitalization, most rural  
5 residents have a lower opportunity cost in terms of time than urban residents, since  
6 they don't have an office-commuting requirement.  
7  
8

9  
10 While the bed occupancy rate of tertiary hospitals in China could be as high as 107.5%  
11 on average due to temporarily added beds, it may be as low as 58.0% in  
12 township-level hospitals [46]. It is often difficult to get admitted into tertiary hospitals,  
13 or for shorter lengths of stay[17]. When there is a higher density of hospital beds in  
14 rural areas, it may be easier for a patient to get admitted for hospitalization[47-49].  
15 Therefore, rural residents with easy hospitalization admission may perceive having  
16 good quality healthcare with a low cost. Consequently, they may report having a high  
17 level of satisfaction.  
18

19  
20 As shown in Table 6, the odds ratio of Rural\*2015 is as large as 1.57 ( $p<0.001$ ). This  
21 finding indicates a large and significant enhancement in the satisfaction with the  
22 healthcare system in rural areas. After controlling the changes in 2015, the odds ratio  
23 of the rural area becomes insignificant, while the year dummy of 2015 is still large  
24 and highly significant ( $OR=1.24$ ,  $p<0.001$ ). Together, these results suggest that the  
25 healthcare reform actions of China from 2013 to 2015 have brought significant  
26 improvements to the healthcare satisfaction in rural areas.  
27  
28  
29  
30  
31  
32  
33  
34  
35  
36

### 37 ***Regional variations and changes in 2015***

38  
39 The regional differences in the healthcare system satisfaction may have reflected the  
40 inequality of healthcare resources and quality in China[50]. Beijing, Shanghai, Tianjin,  
41 and Chongqing City, the four municipalities, are the most important central cities in  
42 China with the most advanced and abundant healthcare resources in China. Since they  
43 have also piloted many healthcare reform plans, it is not unexpected that there are no  
44 significant changes in public satisfaction with the healthcare system during the  
45 studied period.  
46  
47  
48  
49  
50

51 Middle and West regions, are more likely to experience a significant and large  
52 enhancement in healthcare satisfaction during the reform period of 2013-2015,  
53 because many of the reform policies were eventually implemented in these regions  
54 after piloting in the East region of China.  
55  
56  
57

58 Shanghai's lower level of satisfaction may be due to the very crowded hospital  
59  
60

1  
2  
3 environment and overstretched resources. As the most modernized city in China,  
4 Shanghai has the most skilled professionals and advanced medical equipment.  
5 However, due to the lack of a referral system, all tertiary hospitals in Shanghai are  
6 always in high demand and crowded with patients from all over the country[17].  
7 Hence, local Shanghai residents actually don't have a good experience generally. This  
8 situation has not improved during this round of healthcare reform.  
9

10  
11 It is noted that the Northeast Region consistently reported a lower level of satisfaction  
12 and no significant improvements during the studied period. The low satisfaction  
13 actually can be attributed to the weak economy concurrently in this region. Known as  
14 China's rustbelt, the three northeastern provinces were plagued by widespread layoffs  
15 in the 1990s and were among the regions with the weakest economic growth in  
16 2010s[51]. With a shrinking economy and fiscal deficits, the local governments had  
17 very limited resources available for healthcare and many local healthcare  
18 professionals migrated to other developed regions in the country[9, 52]. Additionally,  
19 poor economic performance may also directly affect the respondents' perception and  
20 lead to a lower rating of the public policies, including the healthcare system[4, 5].  
21 Additionally, Chen et al. (2019) report that patients in the Northeast consistently had  
22 the highest mortalities in terms of the overall stroke and each subtype of stroke[53].  
23 The researchers indicate that this may be mainly due to the differences in lifestyle and  
24 inconsistent medical development and a lower economic level.  
25  
26  
27  
28  
29  
30  
31  
32  
33  
34  
35  
36  
37  
38

### 39 ***Robustness check***

40  
41 As a robustness check, "being satisfied" is redefined as scoring equal to or greater  
42 than 80 points. About 15% of the sample population scored their satisfaction equal to  
43 or greater than 80 points. Logistic regressions of the same model were performed  
44 accordingly.  
45  
46

47  
48 Ordinary Least Square (OLS) regressions were also performed, using the original  
49 'satisfaction score' of respondents as the dependent variable.  
50

51 The results of the robustness checks above are all consistent with our current findings.  
52  
53

### 54 **LIMITATIONS**

55  
56 As a type of subjective evaluation, public satisfaction has several weaknesses when  
57 being adopted to measure the healthcare system's performance. First, the data in this  
58  
59  
60

1  
2  
3 study, especially, the CGSS 2013, contains only one global satisfaction score.  
4 Therefore, it is difficult to attribute the satisfaction or dissatisfaction to specific  
5 reform actions or issues of the healthcare system[5]. With the advancement in  
6 research and reform of the healthcare system in China, a dataset with more detailed  
7 information may be available in more recent or future years. Grey Relational Analysis  
8 method, as a novel quantitative method, can also be applied to obtain more detailed  
9 results to better understand the fuzzy/grey concept of satisfaction with the health  
10 system [54-56].

11  
12  
13  
14  
15  
16  
17 Second, while being related to the quality and outcome of healthcare service, public  
18 satisfaction may also be influenced by some external factors, such as media and  
19 political discussion [5, 36], or the citizens' expectations[54-57]. Since these  
20 confounding factors are not included in the original survey data and it is almost  
21 impossible to identify or recover them from other resources, the possibility of  
22 potential bias cannot be completely ruled out. While it will be interesting to study  
23 how media reports and portrayals about physicians and hospitals may influence the  
24 public's perception or satisfaction with the healthcare system in China, this topic  
25 actually is beyond our research scope and expertise. Third, self-reported health status  
26 is used as a health measurement in this study. It is generally valid, however, not as  
27 ideal as clinical health measurements.  
28  
29  
30  
31  
32  
33  
34  
35  
36

## 37 **CONCLUSION**

38  
39 Using a total sample of 15,969 observations from Chinese national representative  
40 surveys, the CGSS 2013 and 2015, this study examined various factors associated  
41 with public satisfaction of the healthcare system in China, such as demographic and  
42 individual socioeconomic characteristics, rural areas and regions across the country,  
43 as well as the changes of public satisfaction in 2015.  
44  
45  
46  
47

48 While there was a nation-wide general improvement in the satisfaction level recorded  
49 in year 2015, when the 2nd phase of the 2009 Health Reform was implemented, the  
50 low level of satisfaction among internal migrants as well as those of residents in the  
51 Northeast region of China remained unchanged. Especially, close attention and further  
52 study about the causal reason for the low level of satisfaction in the Northeast region  
53 is recommended.  
54  
55  
56  
57  
58  
59  
60

**Ethical Statement**

The data used in this study is obtained from a publicly available national database.

**Funding statement**

This work was supported by the Macao Higher Education Fund, Specialized Subsidy Scheme for Macao Higher Education Institutions in the Area of Research in Humanities and Social Sciences. Grant No.: DSES-19-016b-MSB.

LIU Chengkun acknowledges the financial support of Faculty Research Grant from Macau University of Science and Technology. Grant No.: FRG-19-049-TISD.

**Competing interests statement**

No competing financial, professional, or personal interests that might have influenced the performance or presentation of the work described in this manuscript.

**Author contributions**

JHZ, XP, CKL designed the study and developed the methods. JHZ, XP, and HZ reviewed literature. JHZ, XP, YJC sorted and analyzed the data. XP prepared the tables. JHZ and XP drafted the manuscript. CKL, HZ and OOI provided a critical review of the manuscript. All authors have reviewed and approved the final version of the manuscript for publication.



## Reference

- 1 Mossialos E. Citizens' views on health care systems in the 15 member states of the European Union, *Health Econ* 1997;6:109-16.
- 2 Blendon RJ, Kim M, Benson JM. The public versus the World Health Organization on health system performance, *Health Aff* 2001;20:10-20.
- 3 Papanicolas I, Cylus J, Smith PC. An analysis of survey data from eleven countries finds that 'satisfaction' with health system performance means many things, *Health Aff* 2013;32:734-42.
- 4 AlSaud AM, Taddese HB, Filippidis FT. Trends and correlates of the public's perception of healthcare systems in the European Union: a multilevel analysis of Eurobarometer survey data from 2009 to 2013, *BMJ Open* 2018;8:e018178,2017-018178.
- 5 Footman K, Roberts B, Mills A, et al. Public satisfaction as a measure of health system performance: a study of nine countries in the former Soviet Union, *Health Policy* 2013;112:62-9.
- 6 Hero JO, Blendon RJ, Zaslavsky AM, et al. Understanding what makes Americans dissatisfied with their health care system: an international comparison, *Health Aff* 2016;35:502-9.
- 7 Grosso AL, Van Ryzin GG. Public management reform and citizen perceptions of the UK health system, *International Review of Administrative Sciences* 2012;78:494-513.
- 8 Eggleston K. Health care for 1.3 billion: An overview of China's health system, 2012.
- 9 Liu GG, Vortherms SA, Hong X. China's health reform update, *Annu Rev Public Health* 2017;38:431-48.
- 10 Zhao D, Zhao H, Cleary PD. Understanding the determinants of public trust in the health care system in China: an analysis of a cross-sectional survey, *J Health Serv Res Policy* 2019;24:37-43.
- 11 Fan JB. Research on the perception structure of residents' satisfaction with public health service, *East China normal university (philosophy and social science edition)* 2018;50:163-171.

- 1  
2  
3 12 Wang, Z; Zhou, L; Peng, F. Fiscal expenditure, scale comparison and public  
4 service satisfaction: an analysis based on county-level medical data, *Chinese*  
5 *administration* 2018:14.  
6  
7  
8 13 Munro N, Duckett J. Explaining public satisfaction with health-care systems:  
9 findings from a nationwide survey in China, *Health Expectations* 2016;19:654-66.  
10  
11  
12 14 Cheng L. Influencing Factors of Health Service Satisfaction of Urban and Rural  
13 Residents -- An Empirical Analysis Based on 604 Questionnaires in Anhui Province,  
14 *Journal of Yichun University* 2014;36:34-37.  
15  
16  
17 15 Tang J. Farmers' satisfaction with rural medical and health services and its  
18 influencing factors -- based on questionnaire survey data of 375 farmers, *Journal of*  
19 *hunan agricultural university: social science edition* 2016;17:2-48.  
20  
21  
22 16 Shan L, Zhao M, Ning N, et al. Dissatisfaction with current integration reforms of  
23 health insurance schemes in China: are they a success and what matters? *Health*  
24 *Policy Plan* 2018;33:345-54.  
25  
26  
27 17 Zhang JH, Yuan J, Wang T. Direct cost of dengue hospitalization in Zhongshan,  
28 China: Associations with demographics, virus types and hospital accreditation, *PLoS*  
29 *neglected tropical diseases* 2017;11:e0005784.  
30  
31  
32 18 Yinzi Jin, Hou Z, Zhang D. Determinants of Health Insurance Coverage among  
33 People Aged 45 and over in China: Who Buys Public, Private and Multiple Insurance,  
34 *PLoS One* 2016;11:e0161774.  
35  
36  
37 19 Brixi H, Mu Y, Targa B, et al. Engaging sub-national governments in addressing  
38 health equities: challenges and opportunities in China's health system reform, *Health*  
39 *Policy Plan* 2012;28:809-24.  
40  
41  
42 20 Ramesh M, Wu X, He AJ. Health governance and healthcare reforms in China,  
43 *Health Policy Plan* 2013;29:663-72.  
44  
45  
46 21 Zhang L, Liu N. Health reform and out-of-pocket payments: lessons from China,  
47 *Health Policy Plan* 2013;29:217-26.  
48  
49  
50 22 Penm J, Li Y, Zhai S, et al. The impact of clinical pharmacy services in China on  
51 the quality use of medicines: a systematic review in context of China's current  
52 healthcare reform, *Health Policy Plan* 2013;29:849-72.  
53  
54  
55 23 Wu D, Lam TP, Lam KF, et al. Challenges to healthcare reform in China:  
56 profit-oriented medical practices, patients' choice of care and guanxi culture in  
57 Zhejiang province, *Health Policy Plan* 2017;32:1241-7.  
58  
59  
60

1  
2  
3 24 Li L, Fu H. China's health care system reform: Progress and prospects, *Int J Health*  
4 *Plann Manage* 2017;32:240-53.

5  
6  
7 25 Eggleston K, Ling L, Qingyue M, et al. Health service delivery in China: a  
8 literature review, *Health Econ* 2008;17:149-65.

9  
10  
11 26 Liu J, Zhang Y. Health status and health disparity in China: a demographic and  
12 socioeconomic perspective, *China Population and Development Studies*  
13 2019;2:301-22.

14  
15  
16 27 Li X, Lu J, Hu S, et al. The primary health-care system in China, *The Lancet*  
17 2017;390:2584-94.

18  
19  
20 28 Yu H. Universal health insurance coverage for 1.3 billion people: what accounts  
21 for China's success? *Health Policy* 2015;119:1145-52.

22  
23  
24 29 Hesketh T, Wu D, Mao L, et al. Violence against doctors in China, *BMJ*  
25 2012;345:e5730.

26  
27  
28 30 Wang X, Wang X, Zheng J. How to end violence against doctors in China, *The*  
29 *Lancet* 2012;380:647-8.

30  
31  
32 31 Shi L, Zhang D, Zhou C, et al. A cross-sectional study on the prevalence and  
33 associated risk factors for workplace violence against Chinese nurses, *BMJ Open*  
34 2017;7:e013105,2016-013105.

35  
36  
37 32 Burns LR, Liu GG. China's Healthcare System and Reform: Cambridge University  
38 Press 2017.

39  
40  
41 33 Jiao WP. Diagnosis-Related Groups' Payment Reform in Beijing, *Chin Med J*  
42 *(Engl)* 2018;131:1763-4.

43  
44  
45 34 Xesfingi S, Vozikis A. Patient satisfaction with the healthcare system: Assessing  
46 the impact of socio-economic and healthcare provision factors, *BMC health services*  
47 *research* 2016;16:94.

48  
49  
50 35 Stokes J, Gurol-Urganci I, Hone T, et al. Effect of health system reforms in Turkey  
51 on user satisfaction, *J Glob Health* 2015;5:020403.

52  
53  
54 36 Bleich SN, Özaltın E, Murray CJ. How does satisfaction with the health-care  
55 system relate to patient experience? *Bull World Health Organ* 2009;87:271-8.

56  
57  
58 37 Vuong Q, Vuong T, Ho T, et al. Psychological and socio-economic factors  
59 affecting social sustainability through impacts on perceived health care quality and  
60 public health: The case of Vietnam, *Sustainability* 2017;9:1456.

- 1  
2  
3 38 Lee S, Suh NK, Song J. Determinants of public satisfaction with the National  
4 Health Insurance in South Korea, *Int J Health Plann Manage* 2009;24:131-46.  
5  
6  
7 39 Dong W, Zhang Q, Yan C, et al. Residents' satisfaction with primary medical and  
8 health services in Western China, *BMC health services research* 2017;17:298.  
9  
10  
11 40 He AJ. Public satisfaction with the health system and popular support for state  
12 involvement in an East Asian welfare regime: health policy legitimacy of Hong Kong,  
13 *Social Policy & Administration* 2018;52:750-70.  
14  
15  
16 41 Liu Y, Yuan Z, Liu Y, et al. Changing community health service delivery in  
17 economically less-developed rural areas in China: impact on service use and  
18 satisfaction, *BMJ Open* 2014;4:e004148,2013-004148.  
19  
20  
21 42 Kohl J, Wendt C. Satisfaction with health care systems. In: Anonymous .  
22 Challenges for quality of life in the contemporary world: Springer 2004:311-31.  
23  
24  
25 43 Missinne S, Meuleman B, Bracke P. The popular legitimacy of European  
26 healthcare systems: a multilevel analysis of 24 countries, *Journal of European Social*  
27 *Policy* 2013;23:231-47.  
28  
29  
30 44 Hockenberry JM, Becker ER. How do hospital nurse staffing strategies affect  
31 patient satisfaction? *ILR Review* 2016;69:890-910.  
32  
33  
34 45 Kringos DS, Boerma W, van der Zee J, et al. Europe's strong primary care systems  
35 are linked to better population health but also to higher health spending, *Health Aff*  
36 2013;32:686-94.  
37  
38  
39 46 Liu YF, Wang S, Qiao HM. Correlation analysis between the average length of  
40 stay of discharged patients and the utilization rate of hospital beds, *China Health*  
41 *Care&Nutrition* 2012;9:4205-6.  
42  
43  
44 47 Folland S, Goodman AC, Stano M. The economics of health and health care:  
45 Taylor & Francis 2017.  
46  
47  
48 48 Wennberg JE, Barnes BA, Zubkoff M. Professional uncertainty and the problem of  
49 supplier-induced demand, *Soc Sci Med* 1982;16:811-24.  
50  
51  
52 49 Watts BV, Shiner B, Klauss G, et al. Supplier-induced demand for psychiatric  
53 admissions in Northern New England, *BMC Psychiatry* 2011;11:146.  
54  
55  
56 50 Meng Q, Fang H, Liu X, et al. Consolidating the social health insurance schemes  
57 in China: towards an equitable and efficient health system, *The Lancet*  
58 2015;386:1484-92.  
59  
60

1  
2  
3 51 Li XP. Is the economic decline in northeast China really the fault of the system?  
4 *Resource Recycling* 2016;7:74-77.  
5

6  
7 52 Zhang S, Zhang W, Zhou H, et al. How China's new health reform influences  
8 village doctors' income structure: evidence from a qualitative study in six counties in  
9 China, *Human resources for health* 2015;13:26.  
10

11  
12 53 Chen H, Shi L, Wang N, et al. Analysis on geographic variations in hospital deaths  
13 and endovascular therapy in ischaemic stroke patients: an observational  
14 cross-sectional study in China, *BMJ Open* 2019;9:e029079,2019-029079.  
15

16  
17 54 Javed SA, Liu S, Mahmoudi A, et al. Patients' satisfaction and public and private  
18 sectors' health care service quality in Pakistan: Application of grey decision analysis  
19 approaches, *Int J Health Plann Manage* 2019;34:e168-82.  
20

21  
22 55 Javed SA, Liu S. Evaluation of outpatient satisfaction and service quality of  
23 Pakistani healthcare projects: Application of a novel synthetic Grey Incidence  
24 Analysis model, *Grey Systems: Theory and Application* 2018.  
25

26  
27 56 Javed SA, Ilyas F. Service quality and satisfaction in healthcare sector of  
28 Pakistan—the patients' expectations, *Int J Health Care Qual Assur* 2018.  
29

30  
31 57 Tavares AI, Ferreira PL. Public satisfaction with health system coverage, empirical  
32 evidence from SHARE data, *International Journal of Health Economics and*  
33 *Management* 2020:1-21.  
34  
35  
36  
37  
38  
39  
40  
41  
42  
43  
44  
45  
46  
47  
48  
49  
50  
51  
52  
53  
54  
55  
56  
57  
58  
59  
60

**Table 1 Descriptive statistics of the respondents in CGSS 2013-2015**

|                                                | Total  | 2013   | 2015   | Chi2  |
|------------------------------------------------|--------|--------|--------|-------|
| N                                              | 15969* | 5566   | 10403  | /     |
| <b>Satisfaction</b>                            | 68.50  | 66.21  | 69.73  | /     |
| <b>Being satisfied</b>                         | 60.08% | 52.91% | 63.93% | /     |
| <b>Age</b>                                     |        |        |        |       |
| Age(average years)                             | 51.9   | 50.8   | 52.5   | /     |
| Age<60                                         | 63.4%  | 66.4%  | 61.8%  | 32.34 |
| Age>=60                                        | 36.6%  | 33.6%  | 38.2%  |       |
| <b>Gender</b>                                  |        |        |        |       |
| Male                                           | 50.6%  | 50.8%  | 50.5%  | 0.07  |
| Female                                         | 49.4%  | 49.2%  | 49.5%  |       |
| <b>Ethnic group</b>                            |        |        |        |       |
| Han                                            | 92.8%  | 92.4%  | 93.1%  | 2.30  |
| Ethnic minority                                | 7.2%   | 7.6%   | 7.0%   |       |
| <b>Marital status</b>                          |        |        |        |       |
| Single/separated/widow/widower                 | 29.3%  | 28.8%  | 29.6%  | 1.10  |
| Cohabitation& Married                          | 70.7%  | 71.2%  | 70.4%  |       |
| <b>Employment status</b>                       |        |        |        |       |
| Not working                                    | 43.1%  | 39.8%  | 44.9%  | 38.86 |
| Employed/Farm                                  | 56.9%  | 60.3%  | 55.1%  |       |
| <b>Education</b>                               |        |        |        |       |
| Elementary School or less                      | 37.8%  | 36.2%  | 38.7%  | 10.71 |
| Middle / high School                           | 45.6%  | 47.0%  | 44.9%  |       |
| College                                        | 15.5%  | 15.8%  | 15.3%  |       |
| Postgraduate                                   | 1.1%   | 1.1%   | 1.1%   |       |
| <b>Self-reported health</b>                    |        |        |        |       |
| Very bad                                       | 3.3%   | 3.4%   | 3.3%   | 49.54 |
| Bad                                            | 15.3%  | 14.4%  | 15.8%  |       |
| Average                                        | 21.6%  | 19.8%  | 22.6%  |       |
| Good                                           | 38.0%  | 37.7%  | 38.1%  |       |
| Very good                                      | 21.8%  | 24.7%  | 20.3%  |       |
| <b>Self-reported household economic status</b> |        |        |        |       |
| Far below average                              | 6.0%   | 5.7%   | 6.2%   | 37.26 |
| Below average                                  | 32.2%  | 30.2%  | 33.3%  |       |
| Average                                        | 53.7%  | 57.0%  | 52.0%  |       |
| Above average                                  | 8.1%   | 7.3%   | 8.2%   |       |
| <b>Insurance status</b>                        |        |        |        |       |
| Without any health Insurance                   | 10.2%  | 11.3%  | 9.6%   | 10.90 |
| With any health insurance                      | 89.8%  | 88.7%  | 90.4%  |       |
| <b>Residence status</b>                        |        |        |        |       |
| Urban                                          | 60.0%  | 59.7%  | 60.2%  | 0.28  |
| Rural                                          | 40.0%  | 40.3%  | 39.8%  |       |
| <b>Internal migrant</b>                        |        |        |        |       |

|    |                                  |       |       |       |       |
|----|----------------------------------|-------|-------|-------|-------|
| 1  |                                  |       |       |       |       |
| 2  |                                  |       |       |       |       |
| 3  | No                               | 89.0% | 88.7% | 89.2% |       |
| 4  | Yes                              | 11.0% | 11.3% | 10.8% | 1.09  |
| 5  |                                  |       |       |       |       |
| 6  | <b>Regions or municipalities</b> |       |       |       |       |
| 7  | East China(without Shanghai)     | 23.2% | 23.6% | 23.1% |       |
| 8  | Middle China                     | 23.9% | 22.2% | 24.8% |       |
| 9  | West China (without Chongqing)   | 21.7% | 21.1% | 22.0% |       |
| 10 | Northeast China                  | 14.2% | 14.9% | 13.8% |       |
| 11 | Beijing                          | 5.1%  | 4.7%  | 5.3%  | 37.28 |
| 12 | Shanghai                         | 6.2%  | 7.0%  | 5.7%  |       |
| 13 | Tianjin                          | 3.2%  | 3.7%  | 3.0%  |       |
| 14 | Chongqing                        | 2.6%  | 3.0%  | 2.4%  |       |
| 15 |                                  |       |       |       |       |
| 16 |                                  |       |       |       |       |
| 17 |                                  |       |       |       |       |
| 18 |                                  |       |       |       |       |
| 19 |                                  |       |       |       |       |
| 20 |                                  |       |       |       |       |
| 21 |                                  |       |       |       |       |
| 22 |                                  |       |       |       |       |
| 23 |                                  |       |       |       |       |
| 24 |                                  |       |       |       |       |
| 25 |                                  |       |       |       |       |
| 26 |                                  |       |       |       |       |
| 27 |                                  |       |       |       |       |
| 28 |                                  |       |       |       |       |
| 29 |                                  |       |       |       |       |
| 30 |                                  |       |       |       |       |
| 31 |                                  |       |       |       |       |
| 32 |                                  |       |       |       |       |
| 33 |                                  |       |       |       |       |
| 34 |                                  |       |       |       |       |
| 35 |                                  |       |       |       |       |
| 36 |                                  |       |       |       |       |
| 37 |                                  |       |       |       |       |
| 38 |                                  |       |       |       |       |
| 39 |                                  |       |       |       |       |
| 40 |                                  |       |       |       |       |
| 41 |                                  |       |       |       |       |
| 42 |                                  |       |       |       |       |
| 43 |                                  |       |       |       |       |
| 44 |                                  |       |       |       |       |
| 45 |                                  |       |       |       |       |
| 46 |                                  |       |       |       |       |
| 47 |                                  |       |       |       |       |
| 48 |                                  |       |       |       |       |
| 49 |                                  |       |       |       |       |
| 50 |                                  |       |       |       |       |
| 51 |                                  |       |       |       |       |
| 52 |                                  |       |       |       |       |
| 53 |                                  |       |       |       |       |
| 54 |                                  |       |       |       |       |
| 55 |                                  |       |       |       |       |
| 56 |                                  |       |       |       |       |
| 57 |                                  |       |       |       |       |
| 58 |                                  |       |       |       |       |
| 59 |                                  |       |       |       |       |
| 60 |                                  |       |       |       |       |

**Note:**\* the total observation number is sample-weight adjusted.

1  
2  
3  
4  
5  
6  
7  
8  
9  
10  
11  
12  
13  
14  
15  
16  
17  
18  
19  
20  
21  
22  
23  
24  
25  
26  
27  
28  
29  
30  
31  
32  
33  
34  
35  
36  
37  
38  
39  
40  
41  
42  
43  
44  
45  
46

**Table 2 Descriptive statistics of the medical resource in CGSS 2013-2015**

|                                | Healthcare expenditure percent in GDP(%) |        |         | Government percent in healthcare expenditure(%) |        |          |       | Out of pocket(%) |          |      |      | Hospital beds/1k population |        |      | Healthcare workforce/1k population |        |  |
|--------------------------------|------------------------------------------|--------|---------|-------------------------------------------------|--------|----------|-------|------------------|----------|------|------|-----------------------------|--------|------|------------------------------------|--------|--|
|                                | Mean                                     | 95% CI |         | Mean                                            | 95% CI |          |       | Mean             | 95% CI   |      |      | Mean                        | 95% CI |      | Mean                               | 95% CI |  |
| Total                          | 5.48                                     | 5.47   | to 5.49 | 29.45                                           | 29.40  | to 29.51 | 33.12 | 33.06            | to 33.19 | 6.05 | 6.01 | to 6.08                     | 2.84   | 2.82 | to 2.85                            |        |  |
| East China(without Shanghai)   | 4.24                                     | 4.23   | to 4.26 | 25.83                                           | 25.77  | to 25.90 | 31.89 | 31.81            | to 31.97 | 5.96 | 5.90 | to 6.03                     | 2.97   | 2.94 | to 3.01                            |        |  |
| Middle China                   | 5.45                                     | 5.44   | to 5.46 | 32.84                                           | 32.77  | to 32.92 | 36.87 | 36.78            | to 36.96 | 5.82 | 5.75 | to 5.89                     | 2.36   | 2.33 | to 2.39                            |        |  |
| West China (without Chongqing) | 6.57                                     | 6.55   | to 6.59 | 36.54                                           | 36.42  | to 36.67 | 32.13 | 32.05            | to 32.20 | 5.87 | 5.79 | to 5.96                     | 2.38   | 2.34 | to 2.41                            |        |  |
| Northeast China                | 5.53                                     | 5.51   | to 5.55 | 24.51                                           | 24.46  | to 24.56 | 40.41 | 40.30            | to 40.51 | 6.44 | 6.33 | to 6.55                     | 2.67   | 2.63 | to 2.70                            |        |  |
| Beijing                        | 7.21                                     | 7.19   | to 7.24 | 25.43                                           | 25.35  | to 25.51 | 20.45 | 20.34            | to 20.56 | 7.48 | 7.36 | to 7.61                     | 5.60   | 5.53 | to 5.66                            |        |  |
| Shanghai                       | 5.59                                     | 5.58   | to 5.60 | 20.79                                           | 20.76  | to 20.83 | 20.22 | 20.17            | to 20.27 | 6.89 | 6.74 | to 7.04                     | 4.27   | 4.26 | to 4.27                            |        |  |
| Tianjin                        | 3.97                                     | 3.95   | to 3.99 | 25.86                                           | 25.81  | to 25.91 | 34.20 | 34.03            | to 34.37 | 5.36 | 5.23 | to 5.48                     | 3.15   | 3.12 | to 3.18                            |        |  |
| Chongqing                      | 5.64                                     | 5.62   | to 5.65 | 31.23                                           | 31.20  | to 31.26 | 32.22 | 31.90            | to 32.54 | 4.26 | 4.21 | to 4.31                     | 1.58   | 1.55 | to 1.60                            |        |  |



**Table 3 Descriptive statistics of satisfaction about the healthcare system in China (2013-2015)**  
**Panel A: Satisfaction Score about the healthcare system in China (2013-2015)**

|                                                | Full sample |                |  | Subsample of Year 2013 |                |  | Subsample of Year 2015 |                |  |
|------------------------------------------------|-------------|----------------|--|------------------------|----------------|--|------------------------|----------------|--|
|                                                | Mean        | 95% CI         |  | Mean                   | 95% CI         |  | Mean                   | 95% CI         |  |
| <b>Satisfaction</b>                            | 68.50       | 68.20 to 68.80 |  | 66.21                  | 65.73 to 66.68 |  | 69.73                  | 69.34 to 70.12 |  |
| <b>Age</b>                                     |             |                |  |                        |                |  |                        |                |  |
| Age<60                                         | 67.43       | 67.06 to 67.80 |  | 65.40                  | 64.82 to 65.97 |  | 68.60                  | 68.11 to 69.08 |  |
| Age>=60                                        | 70.35       | 69.83 to 70.88 |  | 67.81                  | 66.93 to 68.68 |  | 71.56                  | 70.91 to 72.21 |  |
| <b>Gender</b>                                  |             |                |  |                        |                |  |                        |                |  |
| Male                                           | 68.16       | 67.72 to 68.61 |  | 66.07                  | 65.38 to 66.76 |  | 69.29                  | 68.72 to 69.86 |  |
| Female                                         | 68.84       | 68.42 to 69.26 |  | 66.35                  | 65.67 to 67.02 |  | 70.17                  | 69.64 to 70.71 |  |
| <b>Ethnic group</b>                            |             |                |  |                        |                |  |                        |                |  |
| Han                                            | 68.28       | 67.97 to 68.60 |  | 65.94                  | 65.44 to 66.44 |  | 69.53                  | 69.13 to 69.94 |  |
| Ethnic minority                                | 71.26       | 70.19 to 72.34 |  | 69.42                  | 67.69 to 71.16 |  | 72.35                  | 70.97 to 73.72 |  |
| <b>Marital status</b>                          |             |                |  |                        |                |  |                        |                |  |
| Single/separated/widow/widower                 | 68.07       | 67.40 to 68.74 |  | 65.73                  | 64.68 to 66.79 |  | 69.30                  | 68.44 to 70.15 |  |
| Cohabitation/Married                           | 68.67       | 68.34 to 69.00 |  | 66.40                  | 65.87 to 66.92 |  | 69.91                  | 69.49 to 70.34 |  |
| <b>Employment status</b>                       |             |                |  |                        |                |  |                        |                |  |
| Not working                                    | 69.08       | 68.60 to 69.56 |  | 66.38                  | 65.58 to 67.18 |  | 70.37                  | 69.77 to 70.97 |  |
| Employed/Farm                                  | 68.06       | 67.66 to 68.45 |  | 66.09                  | 65.49 to 66.69 |  | 69.21                  | 68.69 to 69.72 |  |
| <b>Education</b>                               |             |                |  |                        |                |  |                        |                |  |
| Elementary School or less                      | 70.76       | 70.26 to 71.26 |  | 68.15                  | 67.36 to 68.94 |  | 72.07                  | 71.42 to 72.71 |  |
| Middle / high School                           | 67.53       | 67.08 to 67.99 |  | 65.50                  | 64.80 to 66.20 |  | 68.68                  | 68.09 to 69.27 |  |
| College                                        | 66.36       | 65.64 to 67.09 |  | 64.32                  | 63.12 to 65.52 |  | 67.50                  | 66.60 to 68.39 |  |
| Post graduate                                  | 60.69       | 57.59 to 63.78 |  | 59.17                  | 54.19 to 64.15 |  | 61.45                  | 57.55 to 65.35 |  |
| <b>Self-reported health</b>                    |             |                |  |                        |                |  |                        |                |  |
| Very bad                                       | 66.39       | 64.15 to 68.63 |  | 65.68                  | 62.24 to 69.12 |  | 66.79                  | 63.88 to 69.70 |  |
| Bad                                            | 68.28       | 67.43 to 69.13 |  | 65.61                  | 64.23 to 66.99 |  | 69.59                  | 68.52 to 70.66 |  |
| Average                                        | 68.18       | 67.52 to 68.85 |  | 65.43                  | 64.35 to 66.50 |  | 69.48                  | 68.65 to 70.31 |  |
| Good                                           | 68.62       | 68.15 to 69.10 |  | 66.31                  | 65.58 to 67.05 |  | 69.85                  | 69.25 to 70.46 |  |
| Very good                                      | 69.07       | 68.43 to 69.70 |  | 67.09                  | 66.11 to 68.06 |  | 70.36                  | 69.53 to 71.19 |  |
| <b>Self-reported household economic status</b> |             |                |  |                        |                |  |                        |                |  |
| Far below average                              | 65.26       | 63.57 to 66.95 |  | 62.69                  | 59.63 to 65.74 |  | 66.51                  | 64.49 to 68.53 |  |
| Below average                                  | 67.16       | 66.59 to 67.73 |  | 65.19                  | 64.26 to 66.12 |  | 68.12                  | 67.39 to 68.84 |  |
| Average                                        | 69.37       | 68.99 to 69.76 |  | 66.88                  | 66.30 to 67.46 |  | 70.84                  | 70.34 to 71.34 |  |
| Above average                                  | 70.44       | 69.42 to 71.46 |  | 67.87                  | 66.18 to 69.56 |  | 71.61                  | 70.35 to 72.87 |  |
| <b>Insurance status</b>                        |             |                |  |                        |                |  |                        |                |  |
| Without any health Insurance                   | 65.90       | 64.85 to 66.94 |  | 64.36                  | 62.86 to 65.87 |  | 66.86                  | 65.45 to 68.27 |  |
| With any health insurance                      | 68.79       | 68.48 to 69.11 |  | 66.44                  | 65.93 to 66.95 |  | 70.04                  | 69.63 to 70.44 |  |
| <b>Residence status</b>                        |             |                |  |                        |                |  |                        |                |  |
| Urban                                          | 67.48       | 67.08 to 67.87 |  | 67.12                  | 66.52 to 67.72 |  | 67.67                  | 67.15 to 68.18 |  |
| Rural                                          | 70.03       | 69.56 to 70.51 |  | 64.85                  | 64.06 to 65.64 |  | 72.85                  | 72.26 to 73.43 |  |
| <b>Internal migrant</b>                        |             |                |  |                        |                |  |                        |                |  |
| No                                             | 68.99       | 68.67 to 69.31 |  | 66.52                  | 66.01 to 67.02 |  | 70.31                  | 69.91 to 70.72 |  |
| Yes                                            | 64.50       | 63.53 to 65.48 |  | 63.76                  | 62.26 to 65.27 |  | 64.92                  | 63.65 to 66.19 |  |
| <b>Regions or municipalities</b>               |             |                |  |                        |                |  |                        |                |  |
| East China (without Shanghai)                  | 68.32       | 67.74 to 68.91 |  | 67.26                  | 66.29 to 68.23 |  | 68.91                  | 68.16 to 69.66 |  |
| Middle China                                   | 70.53       | 69.98 to 71.08 |  | 66.73                  | 65.84 to 67.62 |  | 72.35                  | 71.67 to 73.04 |  |
| West China (without Chongqing)                 | 70.49       | 69.86 to 71.13 |  | 67.01                  | 65.94 to 68.08 |  | 72.29                  | 71.50 to 73.08 |  |
| Northeast China                                | 63.88       | 62.94 to 64.82 |  | 62.88                  | 61.53 to 64.23 |  | 64.46                  | 63.20 to 65.73 |  |
| Beijing                                        | 66.10       | 64.58 to 67.62 |  | 63.75                  | 61.70 to 65.80 |  | 67.22                  | 65.23 to 69.21 |  |
| Shanghai                                       | 64.33       | 62.91 to 65.75 |  | 62.61                  | 60.40 to 64.83 |  | 65.45                  | 63.63 to 67.27 |  |
| Tianjin                                        | 68.84       | 67.31 to 70.36 |  | 70.60                  | 69.05 to 72.14 |  | 67.66                  | 65.36 to 69.97 |  |
| Chongqing                                      | 73.94       | 72.46 to 75.41 |  | 71.67                  | 69.04 to 74.30 |  | 75.45                  | 73.73 to 77.17 |  |

**Panel B: Being satisfied with the healthcare system in China (%)\***

|                                                | Full sample |        |    |       | Subsample of Year 2013 |        |    |       | Subsample of Year 2015 |        |    |       |
|------------------------------------------------|-------------|--------|----|-------|------------------------|--------|----|-------|------------------------|--------|----|-------|
|                                                | Mean        | 95% CI | to |       | Mean                   | 95% CI | to |       | Mean                   | 95% CI | to |       |
| <b>Satisfaction</b>                            | 60.08       | 59.22  | to | 60.94 | 52.91                  | 51.37  | to | 54.45 | 63.93                  | 62.90  | to | 64.95 |
| <b>Age</b>                                     |             |        |    |       |                        |        |    |       |                        |        |    |       |
| Age<60                                         | 57.58       | 56.53  | to | 58.63 | 51.41                  | 49.60  | to | 53.23 | 61.13                  | 59.85  | to | 62.42 |
| Age>=60                                        | 64.41       | 62.91  | to | 65.92 | 55.86                  | 52.99  | to | 58.74 | 68.46                  | 66.72  | to | 70.19 |
| <b>Gender</b>                                  |             |        |    |       |                        |        |    |       |                        |        |    |       |
| Male                                           | 59.56       | 58.30  | to | 60.81 | 53.09                  | 50.91  | to | 55.27 | 63.04                  | 61.52  | to | 64.56 |
| Female                                         | 60.61       | 59.41  | to | 61.82 | 52.72                  | 50.52  | to | 54.92 | 64.83                  | 63.42  | to | 66.25 |
| <b>Ethnic group</b>                            |             |        |    |       |                        |        |    |       |                        |        |    |       |
| Han                                            | 59.70       | 58.80  | to | 60.59 | 52.37                  | 50.77  | to | 53.97 | 63.60                  | 62.53  | to | 64.68 |
| Ethnic minority                                | 65.00       | 61.90  | to | 68.10 | 52.37                  | 53.89  | to | 65.03 | 68.25                  | 64.60  | to | 71.91 |
| <b>Marital status</b>                          |             |        |    |       |                        |        |    |       |                        |        |    |       |
| Single/separated/widow/widower                 | 60.02       | 58.12  | to | 61.91 | 52.19                  | 48.80  | to | 55.59 | 64.10                  | 61.86  | to | 66.35 |
| Cohabitation / Married                         | 60.10       | 59.16  | to | 61.05 | 53.20                  | 51.52  | to | 54.88 | 63.85                  | 62.72  | to | 64.99 |
| <b>Employment status</b>                       |             |        |    |       |                        |        |    |       |                        |        |    |       |
| Not working                                    | 61.26       | 59.91  | to | 62.61 | 53.10                  | 50.57  | to | 55.64 | 65.14                  | 63.56  | to | 66.72 |
| Employed / Farmer                              | 59.18       | 58.05  | to | 60.31 | 52.78                  | 50.84  | to | 54.73 | 62.94                  | 61.56  | to | 64.32 |
| <b>Education</b>                               |             |        |    |       |                        |        |    |       |                        |        |    |       |
| Elementary School or less                      | 65.71       | 64.31  | to | 67.11 | 56.77                  | 54.18  | to | 59.37 | 70.19                  | 68.56  | to | 71.82 |
| Middle / high School                           | 57.56       | 56.28  | to | 58.84 | 51.27                  | 49.05  | to | 53.49 | 61.10                  | 59.55  | to | 62.65 |
| College                                        | 54.58       | 52.32  | to | 56.84 | 49.45                  | 45.51  | to | 53.40 | 57.43                  | 54.69  | to | 60.16 |
| Post graduate                                  | 47.99       | 38.91  | to | 57.06 | 45.15                  | 29.20  | to | 61.10 | 49.41                  | 38.40  | to | 60.43 |
| <b>Self-reported health</b>                    |             |        |    |       |                        |        |    |       |                        |        |    |       |
| Very bad                                       | 55.10       | 49.94  | to | 60.26 | 50.43                  | 41.14  | to | 59.72 | 57.69                  | 51.56  | to | 63.82 |
| Bad                                            | 58.02       | 55.69  | to | 60.35 | 48.76                  | 44.51  | to | 53.01 | 62.56                  | 59.82  | to | 65.31 |
| Average                                        | 58.19       | 56.26  | to | 60.11 | 50.13                  | 46.54  | to | 53.72 | 61.98                  | 59.73  | to | 64.24 |
| Good                                           | 61.59       | 60.21  | to | 62.97 | 53.78                  | 51.31  | to | 56.25 | 65.75                  | 64.10  | to | 67.39 |
| Very good                                      | 61.52       | 59.70  | to | 63.33 | 56.57                  | 53.55  | to | 59.58 | 64.75                  | 62.50  | to | 67.00 |
| <b>Self-reported household economic status</b> |             |        |    |       |                        |        |    |       |                        |        |    |       |
| Far below average                              | 53.21       | 49.24  | to | 57.18 | 46.27                  | 39.02  | to | 53.52 | 56.59                  | 51.89  | to | 61.29 |
| Below average                                  | 56.57       | 54.99  | to | 58.14 | 48.96                  | 46.10  | to | 51.82 | 60.26                  | 58.39  | to | 62.14 |
| Average                                        | 61.97       | 60.81  | to | 63.12 | 54.62                  | 52.60  | to | 56.63 | 66.30                  | 64.91  | to | 67.68 |
| Above average                                  | 66.66       | 63.78  | to | 69.54 | 61.12                  | 55.79  | to | 66.46 | 69.19                  | 65.78  | to | 72.60 |
| <b>Insurance status</b>                        |             |        |    |       |                        |        |    |       |                        |        |    |       |
| Without any health insurance                   | 52.90       | 49.97  | to | 55.83 | 46.92                  | 42.05  | to | 51.79 | 56.66                  | 53.02  | to | 60.31 |
| With any health insurance                      | 60.90       | 59.99  | to | 61.80 | 53.67                  | 52.05  | to | 55.30 | 64.70                  | 63.63  | to | 65.78 |
| <b>Residence status</b>                        |             |        |    |       |                        |        |    |       |                        |        |    |       |
| Urban                                          | 57.67       | 56.55  | to | 58.79 | 54.84                  | 52.90  | to | 56.78 | 59.18                  | 57.81  | to | 60.55 |
| Rural                                          | 63.69       | 62.35  | to | 65.04 | 50.05                  | 47.54  | to | 52.55 | 71.10                  | 69.57  | to | 72.62 |
| <b>Internal migrant</b>                        |             |        |    |       |                        |        |    |       |                        |        |    |       |
| No                                             | 61.43       | 60.53  | to | 62.33 | 53.60                  | 51.99  | to | 55.21 | 65.62                  | 64.54  | to | 66.69 |
| Yes                                            | 49.10       | 46.22  | to | 51.98 | 47.54                  | 42.45  | to | 52.63 | 49.98                  | 46.50  | to | 53.46 |
| <b>Regions or municipalities</b>               |             |        |    |       |                        |        |    |       |                        |        |    |       |
| East China (without Shanghai)                  | 58.66       | 56.89  | to | 60.44 | 54.51                  | 51.27  | to | 57.76 | 60.94                  | 58.81  | to | 63.07 |
| Middle China                                   | 66.38       | 64.73  | to | 68.03 | 55.28                  | 52.19  | to | 58.37 | 71.70                  | 69.78  | to | 73.61 |
| West China(without Chongqing)                  | 64.20       | 62.40  | to | 65.99 | 53.64                  | 50.40  | to | 56.88 | 69.64                  | 67.53  | to | 71.75 |
| Northeast China                                | 47.22       | 44.82  | to | 49.62 | 43.13                  | 39.01  | to | 47.24 | 49.59                  | 46.65  | to | 52.53 |
| Beijing                                        | 53.34       | 49.38  | to | 57.29 | 51.63                  | 45.13  | to | 58.14 | 54.15                  | 49.25  | to | 59.05 |
| Shanghai                                       | 52.52       | 48.53  | to | 56.52 | 45.36                  | 38.83  | to | 51.90 | 57.20                  | 52.34  | to | 62.07 |
| Tianjin                                        | 65.34       | 60.70  | to | 69.97 | 66.85                  | 60.04  | to | 73.66 | 64.33                  | 58.10  | to | 70.55 |
| Chongqing                                      | 74.93       | 70.11  | to | 79.74 | 68.61                  | 59.69  | to | 77.53 | 79.12                  | 73.77  | to | 84.48 |

Note: "Being satisfied" is a dummy variable, taking the value of "1" if a respondent's satisfaction score is greater than 70 points.

**Table 4 Baseline analysis of public satisfaction with the healthcare system in China (Logistic Regression)**

Dep. Var. = "Being Satisfied"

| Variables                                        | Odds Ratio | P-value | 95% CI |    |      |
|--------------------------------------------------|------------|---------|--------|----|------|
| <b>Demographic</b>                               |            |         |        |    |      |
| Age $\geq$ 60                                    | 1.19       | <0.001  | 1.08   | to | 1.32 |
| Female                                           | 1.03       | 0.513   | 0.95   | to | 1.11 |
| Cohabitation & Married                           | 0.93       | 0.108   | 0.84   | to | 1.02 |
| Han (Ethnic minority)                            | 1.28       | 0.001   | 1.11   | to | 1.49 |
| Rural                                            | 1.23       | 0.009   | 1.05   | to | 1.44 |
| Internal migrant                                 | 0.75       | <0.001  | 0.66   | to | 0.85 |
| Employed/Farm                                    | 0.97       | 0.452   | 0.89   | to | 1.06 |
| With any health insurance                        | 1.18       | 0.011   | 1.04   | to | 1.35 |
| <b>Education</b>                                 |            |         |        |    |      |
| Elementary School or less                        | Ref.       |         |        |    |      |
| Middle / high School                             | 0.76       | <0.001  | 0.69   | to | 0.83 |
| College                                          | 0.65       | <0.001  | 0.57   | to | 0.75 |
| Post graduate                                    | 0.55       | 0.002   | 0.37   | to | 0.80 |
| <b>Self-reported health</b>                      |            |         |        |    |      |
| Very bad                                         | Ref.       |         |        |    |      |
| Bad                                              | 1.04       | 0.721   | 0.82   | to | 1.32 |
| Average                                          | 1.18       | 0.163   | 0.93   | to | 1.49 |
| Good                                             | 1.45       | 0.002   | 1.15   | to | 1.83 |
| Very good                                        | 1.61       | 0.000   | 1.27   | to | 2.04 |
| <b>Self-reported household economic status</b>   |            |         |        |    |      |
| Far below average                                | Ref.       |         |        |    |      |
| Below average                                    | 1.21       | 0.037   | 1.01   | to | 1.45 |
| Average                                          | 1.59       | <0.001  | 1.33   | to | 1.90 |
| Above average                                    | 2.05       | <0.001  | 1.64   | to | 2.55 |
| <b>Healthcare resource</b>                       |            |         |        |    |      |
| Healthcare expenditure percent in GDP (%)        | 1.13       | <0.001  | 1.05   | to | 1.20 |
| Government percent in healthcare expenditure (%) | 0.97       | <0.001  | 0.95   | to | 0.98 |
| Out of pocket (%)                                | 1.00       | 0.570   | 0.99   | to | 1.02 |
| Hospital beds /1k population                     | 1.04       | 0.057   | 1.00   | to | 1.08 |
| Healthcare workforce /1k population              | 0.92       | 0.117   | 0.83   | to | 1.02 |
| <b>Region</b>                                    |            |         |        |    |      |
| East China (without Shanghai)                    | Ref.       |         |        |    |      |
| Middle China                                     | 1.36       | 0.001   | 1.14   | to | 1.62 |
| West China (without Chongqing)                   | 1.28       | 0.019   | 1.04   | to | 1.58 |
| Northeast China                                  | 0.49       | 0.000   | 0.41   | to | 0.59 |
| Beijing                                          | 0.83       | 0.342   | 0.56   | to | 1.22 |
| Shanghai                                         | 0.71       | 0.034   | 0.52   | to | 0.98 |
| Tianjin                                          | 1.48       | 0.001   | 1.17   | to | 1.86 |
| Chongqing                                        | 2.03       | <0.001  | 1.50   | to | 2.76 |
| <b>Year</b>                                      |            |         |        |    |      |
| Year2013                                         | Ref.       |         |        |    |      |
| Year2015                                         | 1.51       | <0.001  | 1.36   | to | 1.66 |
| <b>Constant</b>                                  |            |         |        |    |      |
|                                                  | 0.73       | 0.437   | 0.33   | to | 1.61 |
| <b>Observations</b>                              |            |         |        |    |      |
|                                                  | 15,969     |         |        |    |      |

1  
2  
3  
4  
5  
6  
7  
8  
9  
10  
11  
12  
13  
14  
15  
16  
17  
18  
19  
20  
21  
22  
23  
24  
25  
26  
27  
28  
29  
30  
31  
32  
33  
34  
35  
36  
37  
38  
39  
40  
41  
42  
43  
44  
45  
46  
47  
48  
49  
50  
51  
52  
53  
54  
55  
56  
57  
58  
59  
60

**R-squared**

0.07

---

**Note:** Dep. Var. "Being satisfied" is a dummy variable, taking the value of "1" if a respondent's satisfaction score is greater than 70 points.

For peer review only

**Table 5 Association between public satisfaction with the healthcare system and healthcare resources in rural China during 2013 to 2015 (Logistic Regression)**

Dep. Var. = "Being Satisfied"

| Variables                                  | Odds Ratio | P-value | 95% CI       |
|--------------------------------------------|------------|---------|--------------|
| Hospital beds/1k population * Rural        | 1.26       | 0.002   | 1.09 to 1.47 |
| Healthcare workforce/1k population * Rural | 0.96       | 0.545   | 0.84 to 1.09 |
| Rural                                      | 1.12       | 0.243   | 0.93 to 1.34 |
| <b>Constant</b>                            | 0.24       | 0.001   | 0.10 to 0.54 |
| <b>Observations</b>                        | 15,969     |         |              |

Note: The regression has controlled all other variables (including demographic, education, self-reported health, self-reported household economic status, healthcare resource, region, and year) as listed in Table 4.

**Table 6 The changes of public satisfaction with the healthcare system in rural China during 2013 to 2015 (Logistic Regression)**

Dep. Var. = "Being Satisfied"

| Variables           | Odds Ratio | P-value | 95% CI       |
|---------------------|------------|---------|--------------|
| Rural               | 1.00       | 0.982   | 0.83 to 1.20 |
| Rural* Year 2015    | 1.57       | <0.001  | 1.30 to 1.90 |
| Year 2015           | 1.24       | 0.001   | 1.09 to 1.41 |
| <b>Constant</b>     | 0.92       | 0.845   | 0.42 to 2.05 |
| <b>Observations</b> | 15,969     |         |              |

Note: The regression has controlled all other variables (including demographic, education, self-reported health, self-reported household economic status, healthcare resource, region, and year) as listed in Table 4.

**Table 7 Association between public satisfaction with the healthcare system and regions of China during 2013 to 2015 (Logistic Regression)**

Dep. Var.= "Being Satisfied"

| Variables                               | Odds Ratio | P-value | 95% CI |         |
|-----------------------------------------|------------|---------|--------|---------|
| Year 2015                               | 1.23       | 0.022   | 1.03   | to 1.46 |
| East China (without Shanghai)           | Ref.       |         |        |         |
| Middle China                            | 1.00       | 0.989   | 0.79   | to 1.27 |
| West China (without Chongqing)          | 0.99       | 0.955   | 0.76   | to 1.29 |
| Northeast China                         | 0.46       | <0.001  | 0.36   | to 0.60 |
| Beijing                                 | 0.83       | 0.437   | 0.52   | to 1.32 |
| Shanghai                                | 0.62       | 0.065   | 0.38   | to 1.03 |
| Tianjin                                 | 1.72       | 0.004   | 1.20   | to 2.49 |
| Chongqing                               | 1.67       | 0.036   | 1.03   | to 2.69 |
| Year2015*East China (without Shanghai)  | Ref.       |         |        |         |
| Year2015*Middle China                   | 1.60       | <0.001  | 1.27   | to 2.02 |
| Year2015*West China (without Chongqing) | 1.44       | 0.002   | 1.14   | to 1.82 |
| Year2015*Northeast China                | 1.07       | 0.610   | 0.82   | to 1.40 |
| Year2015*Beijing                        | 0.93       | 0.715   | 0.64   | to 1.35 |
| Year2015*Shanghai                       | 1.18       | 0.469   | 0.76   | to 1.83 |
| Year2015*Tianjin                        | 0.77       | 0.289   | 0.48   | to 1.24 |
| Year2015*Chongqing                      | 1.30       | 0.366   | 0.74   | to 2.30 |
| <b>Constant</b>                         | 0.93       | 0.862   | 0.42   | to 2.06 |
| <b>Observations</b>                     | 15,969     |         |        |         |

Note: The regression has controlled all other variables (including demographic, education, self-reported health, self-reported household economic status, healthcare resource, region, and year) as listed in Table 4.

STROBE Statement—Checklist of items that should be included in reports of *cross-sectional studies*

|                              | Item No | Recommendation                                                                                                                                                                                                                                                                                                                                                                        |
|------------------------------|---------|---------------------------------------------------------------------------------------------------------------------------------------------------------------------------------------------------------------------------------------------------------------------------------------------------------------------------------------------------------------------------------------|
| <b>Title and abstract</b>    | 1       | (a) Indicate the study's design with a commonly used term in the title or the abstract:[Page1]<br>(b) Provide in the abstract an informative and balanced summary of what was done and what was found:[Page1]                                                                                                                                                                         |
| <b>Introduction</b>          |         |                                                                                                                                                                                                                                                                                                                                                                                       |
| Background/rationale         | 2       | Explain the scientific background and rationale for the investigation being reported:[Page4-7]                                                                                                                                                                                                                                                                                        |
| Objectives                   | 3       | State specific objectives, including any prespecified hypotheses:[Page5]                                                                                                                                                                                                                                                                                                              |
| <b>Methods</b>               |         |                                                                                                                                                                                                                                                                                                                                                                                       |
| Study design                 | 4       | Present key elements of study design early in the paper:[Page10]                                                                                                                                                                                                                                                                                                                      |
| Setting                      | 5       | Describe the setting, locations, and relevant dates, including periods of recruitment, exposure, follow-up, and data collection:[Page7-8]                                                                                                                                                                                                                                             |
| Participants                 | 6       | (a) Give the eligibility criteria, and the sources and methods of selection of participants:[Page9]                                                                                                                                                                                                                                                                                   |
| Variables                    | 7       | Clearly define all outcomes, exposures, predictors, potential confounders, and effect modifiers. Give diagnostic criteria, if applicable:[Page9-10]                                                                                                                                                                                                                                   |
| Data sources/<br>measurement | 8*      | For each variable of interest, give sources of data and details of methods of assessment (measurement). Describe comparability of assessment methods if there is more than one group:[Page12-13&Page38-40]                                                                                                                                                                            |
| Bias                         | 9       | Describe any efforts to address potential sources of bias:[Page9,16]                                                                                                                                                                                                                                                                                                                  |
| Study size                   | 10      | Explain how the study size was arrived at:[Page7-8]                                                                                                                                                                                                                                                                                                                                   |
| Quantitative variables       | 11      | Explain how quantitative variables were handled in the analyses. If applicable, describe which groupings were chosen and why:[Page9]                                                                                                                                                                                                                                                  |
| Statistical methods          | 12      | (a) Describe all statistical methods, including those used to control for confounding:[Page10]<br>(b) Describe any methods used to examine subgroups and interactions:[Page10]<br>(c) Explain how missing data were addressed:[Page8]<br>(d) If applicable, describe analytical methods taking account of sampling strategy:[N/A]<br>(e) Describe any sensitivity analyses:[Page9,16] |
| <b>Results</b>               |         |                                                                                                                                                                                                                                                                                                                                                                                       |
| Participants                 | 13*     | (a) Report numbers of individuals at each stage of study—eg numbers potentially eligible, examined for eligibility, confirmed eligible, included in the study, completing follow-up, and analysed:[Page8,10-11]<br>(b) Give reasons for non-participation at each stage:[N/A]<br>(c) Consider use of a flow diagram:[N/A]                                                             |
| Descriptive data             | 14*     | (a) Give characteristics of study participants (eg demographic, clinical, social) and information on exposures and potential confounders:[Page 11,24-25]<br>(b) Indicate number of participants with missing data for each variable of interest:[N/A]                                                                                                                                 |
| Outcome data                 | 15*     | Report numbers of outcome events or summary measures:[Page11-13,24-40]                                                                                                                                                                                                                                                                                                                |
| Main results                 | 16      | (a) Give unadjusted estimates and, if applicable, confounder-adjusted estimates and their precision (eg, 95% confidence interval). Make clear which confounders were adjusted for and why they were included:[Page13-16,26-40]                                                                                                                                                        |

1  
2  
3  
4  
5  
6  
7  
8  
9  
10  
11  
12  
13  
14  
15  
16  
17  
18  
19  
20  
21  
22  
23  
24  
25  
26  
27  
28  
29  
30  
31  
32  
33  
34  
35  
36  
37  
38  
39  
40  
41  
42  
43  
44  
45  
46  
47  
48  
49  
50  
51  
52  
53  
54  
55  
56  
57  
58  
59  
60

(b) Report category boundaries when continuous variables were categorized:[Page9]

(c) If relevant, consider translating estimates of relative risk into absolute risk for a meaningful time period:[N/A]

|                          |    |                                                                                                                                                                                        |
|--------------------------|----|----------------------------------------------------------------------------------------------------------------------------------------------------------------------------------------|
| Other analyses           | 17 | Report other analyses done—eg analyses of subgroups and interactions, and sensitivity analyses:[Page14-16]                                                                             |
| <b>Discussion</b>        |    |                                                                                                                                                                                        |
| Key results              | 18 | Summarise key results with reference to study objectives:[Page17]                                                                                                                      |
| Limitations              | 19 | Discuss limitations of the study, taking into account sources of potential bias or imprecision. Discuss both direction and magnitude of any potential bias:[Page16-17]                 |
| Interpretation           | 20 | Give a cautious overall interpretation of results considering objectives, limitations, multiplicity of analyses, results from similar studies, and other relevant evidence:[Page13-17] |
| Generalisability         | 21 | Discuss the generalisability (external validity) of the study results:[Page16]                                                                                                         |
| <b>Other information</b> |    |                                                                                                                                                                                        |
| Funding                  | 22 | Give the source of funding and the role of the funders for the present study and, if applicable, for the original study on which the present article is based:[Page17-18]              |

\*Give information separately for exposed and unexposed groups.

**Note:** An Explanation and Elaboration article discusses each checklist item and gives methodological background and published examples of transparent reporting. The STROBE checklist is best used in conjunction with this article (freely available on the Web sites of PLoS Medicine at <http://www.plosmedicine.org/>, Annals of Internal Medicine at <http://www.annals.org/>, and Epidemiology at <http://www.epidem.com/>). Information on the STROBE Initiative is available at [www.strobe-statement.org](http://www.strobe-statement.org).
